# Supplementary material for: Mutually antagonistic molecular clips: symmetry-breaking non-covalent bonds at the chiral–nonchiral interface
Source: Royal Society of Chemistry journal article supplement (doi:10.1039/d4sc07655a), 2025-01-01
Supplement: d4sc07655a1.pdf [file d4sc07655a1.pdf]

# Electronic Supplementary Information

## **Mutually antagonistic molecular clips: symmetry-breaking non-covalent bonds at the chiral–nonchiral interface**

Sungryul Bae, Younjae Jeong, and Dongwhan Lee\*

*Department of Chemistry, Seoul National University, 1 Gwanak-ro, Gwanak-gu, Seoul 08826, Korea*

## Experimental Section

**General Considerations.** Unless otherwise noted, all reagents were purchased from commercial suppliers and used as received. All air-sensitive manipulations were carried out under inert atmosphere by Schlenk-line techniques. All microwave-assisted synthesis was performed in a Biotage<sup>®</sup> Initiator+ microwave synthesizer. Spectroscopic grade chloroform and acetonitrile were used for circular dichroism (CD) measurements. Chiral HPLC separation was performed with a Daicel Chiralpak IM column on a Shimadzu LC-20AR Semi-Preparative Recycle System equipped with a fraction collector. The compounds benzo[*c*]-1,2,5-thiadiazole-4-(boronic acid pinacol ester),<sup>1</sup> 2-(1-oxo-2,3,4,9-tetrahydro-1*H*-carbazol-8-yl)-1*H*-benzo[*de*]isoquinoline-1,3(2*H*)-dione,<sup>2</sup> 8-(pyren-2-yl)-2,3,4,9-tetrahydro-1*H*-carbazol-1-one,<sup>2</sup> 2-(9-methyl-1-oxo-2,3,4,9-tetrahydro-1*H*-carbazol-8-yl)-1*H*-benzo[*de*]isoquinoline-1,3(2*H*)-dione,<sup>2</sup> and 9-methyl-8-(pyren-2-yl)-2,3,4,9-tetrahydro-1*H*-carbazol-1-one<sup>2</sup> were prepared according to literature procedures.

**Physical Measurements.** <sup>1</sup>H NMR and <sup>13</sup>C NMR spectra were recorded on a 400 MHz Agilent 400-MR DD2 Magnetic Resonance System, a 500 MHz Varian/Oxford As-500 spectrometer, a 500 MHz Bruker Ascend<sup>™</sup> 500 spectrometer, or a 500 MHz Bruker Ascend Evo 500 spectrometer. Chemical shifts were referenced to internal standard of tetramethylsilane (as  $\delta = 0.00$  ppm), or referenced to the residual solvent peaks. High-resolution electrospray ionization (ESI) mass spectra were obtained on a Thermo Scientific LTQ Orbitrap XL mass spectrometer. FT-IR spectra were recorded on a PerkinElmer Spectrum Two FT-IR spectrometer. CD spectra were measured with a Jasco J-1700 Circular Dichroism Spectrophotometer.

---

<sup>1</sup>P. Sonar, E. Williams, S. Singh, and S. Manzhos, *Phys. Chem. Chem. Phys.*, 2013, **15**, 17064–17069.

<sup>2</sup>H. Lee and D. Lee, *Commun. Chem.*, 2022, **5**, 180.

Scheme S1 Synthetic routes to *rac-C\*-NI* and *rac-C\*-P2*.

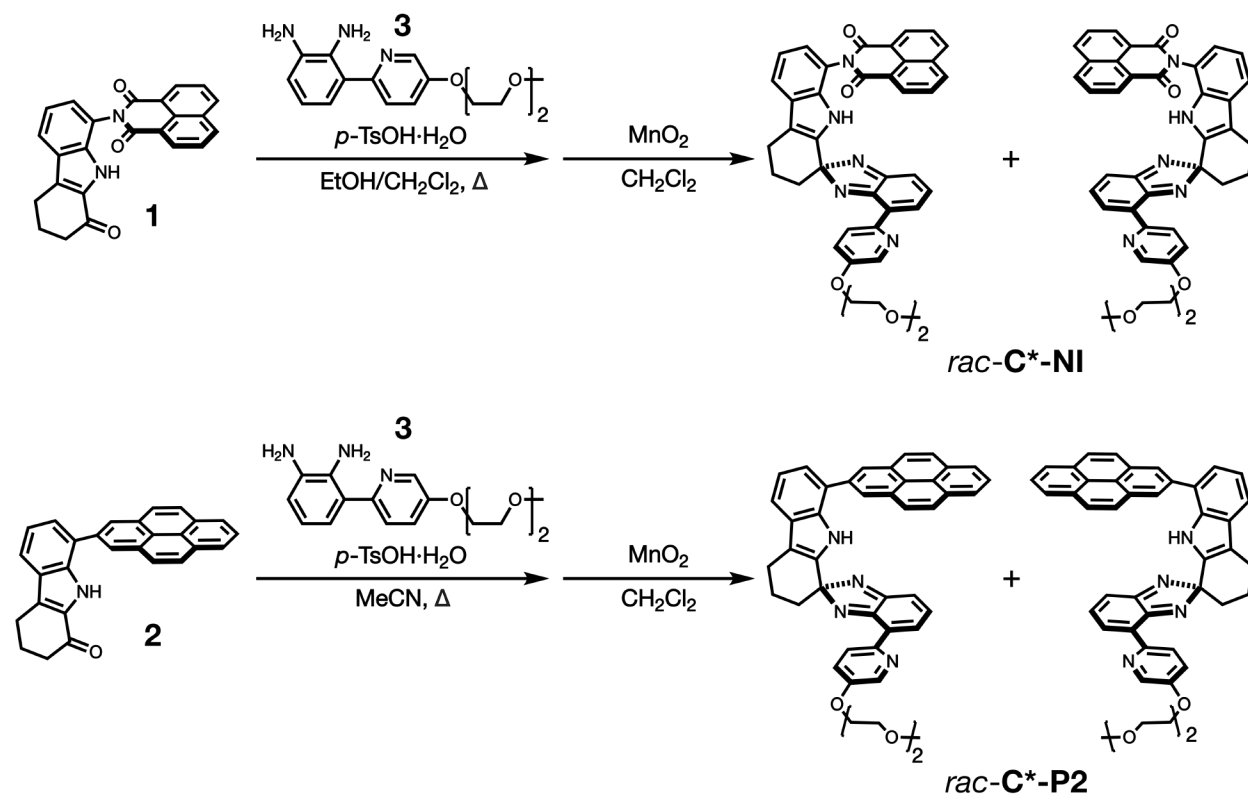

*rac*-2-(4-(5-(2-(2-Methoxyethoxy)ethoxy)pyridin-2-yl)-2',3',4',9'-tetrahydrospiro[benzo[*d*]imidazole-2,1'-carbazol]-8'-yl)-1*H*-benzo[*de*]isoquinoline-1,3(2*H*)-dione (*rac-C\*-NI*). An oven-dried 10–20 mL Biotage<sup>®</sup> Microwave Reaction Vial was loaded with **1** (0.441 g, 1.16 mmol), **3** (0.424 g, 1.40 mmol), *p*-toluenesulfonic acid monohydrate (27.5 mg, 145  $\mu$ mol), anhyd EtOH (15 mL), and anhyd CH<sub>2</sub>Cl<sub>2</sub> (6 mL). The mixture was heated by microwave irradiation at 90 °C with stirring for 16 h, cooled to r.t., and concentrated under reduced pressure. The residual material was transferred into an oven-dried 250 mL round-bottom flask loaded with oven-dried MnO<sub>2</sub> (1.01 g, 11.6 mmol) and CH<sub>2</sub>Cl<sub>2</sub> (100 mL). The mixture was stirred at r.t. for 10 h, filtered through Celite, washed with water (100 mL  $\times$  3), dried over anhyd MgSO<sub>4</sub>, filtered, and concentrated under reduced pressure. Flash column chromatography on SiO<sub>2</sub> (CH<sub>2</sub>Cl<sub>2</sub>:EtOAc = 100:1 to 1:2, v/v) furnished *rac-C\*-NI* as a yellow-orange solid (0.226 g, 0.340 mmol, yield = 29%). <sup>1</sup>H NMR (400 MHz, CDCl<sub>3</sub>, 298 K):  $\delta$  10.91 (s, 1H), 8.14 (d, *J* = 7.2 Hz, 1H), 7.89–7.83 (m, 2H), 7.77–7.69 (m, 3H), 7.50–7.42 (m, 2H), 7.22 (t, *J* = 7.7 Hz, 1H), 7.10–7.06 (m, 1H), 7.02 (d, *J* = 7.4 Hz, 1H), 6.62 (s, 1H), 6.41 (d, *J* = 8.9 Hz, 1H), 6.27 (d, *J* = 8.9 Hz, 1H), 6.06 (s, 1H), 4.14–4.06 (m, 1H), 3.99–3.90 (m, 1H), 3.87–3.82 (m, 2H), 3.80–3.68 (m, 2H), 3.63 (t, *J* = 4.6 Hz, 2H), 3.41 (s, 3H), 3.14 (t, *J* = 6.1 Hz, 2H), 2.46 (s, 2H), 2.15 (s, 2H). <sup>13</sup>C NMR (125 MHz, CDCl<sub>3</sub>, 298 K):  $\delta$  164.30, 163.95, 161.56, 159.38, 154.35, 143.91, 138.01, 134.91, 134.76, 134.07, 133.62, 133.38, 131.25, 131.01, 130.01, 129.18, 128.37, 126.70, 126.49, 125.53, 125.44, 125.13, 123.14, 122.52, 122.37, 122.20, 119.81, 119.30, 119.19, 115.34, 104.48, 72.20, 70.96, 69.60, 68.09, 59.21, 31.34, 23.13, 21.84, 21.58. FT-IR (ATR, cm<sup>-1</sup>): 3150, 3119, 3069, 2923, 2851, 1708, 1675, 1627, 1589, 1565, 1533, 1500, 1483, 1468, 1436, 1378, 1354, 1299, 1269, 1237, 1198, 1188, 1137, 1112, 1071, 1055, 1027, 984, 960, 901, 846, 813, 781, 745, 699, 645, 527, 510. HRMS (ESI) calcd for

C<sub>40</sub>H<sub>34</sub>N<sub>5</sub>O<sub>5</sub> [M + H]<sup>+</sup> 664.2554, found 664.2570.

***rac*-4-(5-(2-(2-Methoxyethoxy)ethoxy)pyridin-2-yl)-8'-(pyren-2-yl)-2',3',4',9'-tetrahydrospiro[benzo[*d*]imidazole-2,1'-carbazole] (*rac*-C\*-P2).** An oven-dried 500 mL round-bottom flask was loaded with **2** (0.571 g, 1.48 mmol), **3** (0.473 g, 1.56 mmol), *p*-toluenesulfonic acid monohydrate (30.3 mg, 159 μmol), and anhyd MeCN (362 mL). The mixture was heated at reflux for 24 h, cooled to r.t., and concentrated under reduced pressure. The residual material was transferred into an oven-dried 500 mL round-bottom flask loaded with oven-dried MnO<sub>2</sub> (1.29 g, 14.8 mmol) and CH<sub>2</sub>Cl<sub>2</sub> (244 mL). The residual material was stirred at r.t. for 4 h, filtered through Celite, washed with water (200 mL × 3), dried over anhyd MgSO<sub>4</sub>, filtered, and concentrated under reduced pressure. Flash column chromatography on SiO<sub>2</sub> (hexane:CH<sub>2</sub>Cl<sub>2</sub> = 100:1 to 7:3, v/v) furnished *rac*-C\*-P2 as a yellow-orange solid (0.210 g, 0.314 mmol, yield = 21%). <sup>1</sup>H NMR (500 MHz, CDCl<sub>3</sub>, 20 mM, 298 K): δ 8.64 (s, 1H), 8.05–7.95 (m, 5H), 7.90 (t, *J* = 7.6 Hz, 1H), 7.81 (d, *J* = 8.9 Hz, 2H), 7.72–7.63 (m, 4H), 7.29–7.23 (m, 2H), 6.91 (s, 1H), 6.64 (d, *J* = 9.1 Hz, 2H), 6.42 (s, 1H), 4.00 (t, *J* = 4.7 Hz, 2H), 3.82 (t, *J* = 4.7 Hz, 2H), 3.75–3.68 (m, 2H), 3.62–3.56 (m, 2H), 3.40 (s, 3H), 3.23–3.07 (m, 2H), 2.57–2.48 (m, 2H), 2.25–2.14 (m, 1H), 2.04–1.93 (m, 1H). <sup>13</sup>C NMR (100 MHz, CDCl<sub>3</sub>, 20 mM, 298 K): δ 161.72, 160.24, 154.35, 144.02, 137.50, 137.10, 135.76, 135.29, 132.60, 131.18, 131.09, 130.84, 128.09, 127.54, 127.30, 126.37, 126.11, 125.85, 125.27, 125.16, 124.98, 124.27, 123.93, 123.61, 123.24, 119.92, 119.46, 118.15, 114.96, 104.47, 72.06, 71.02, 69.62, 67.78, 59.27, 32.69, 23.22, 21.66. FT-IR (ATR, cm<sup>-1</sup>): 3360, 3313, 3185, 3138, 3052, 2953, 2922, 2852, 1661, 1633, 1589, 1563, 1532, 1498, 1468, 1410, 1377, 1308, 1292, 1263, 1222, 1181, 1137, 1107, 1061, 1025, 969, 955, 880, 840, 811, 797, 746, 716, 644. HRMS (ESI) calcd for C<sub>44</sub>H<sub>37</sub>N<sub>4</sub>O<sub>3</sub> [M + H]<sup>+</sup> 669.2860, found 669.2878.

Scheme S2 Synthetic routes to *rac-C\**-NIMe and *rac-C\**-P2Me.

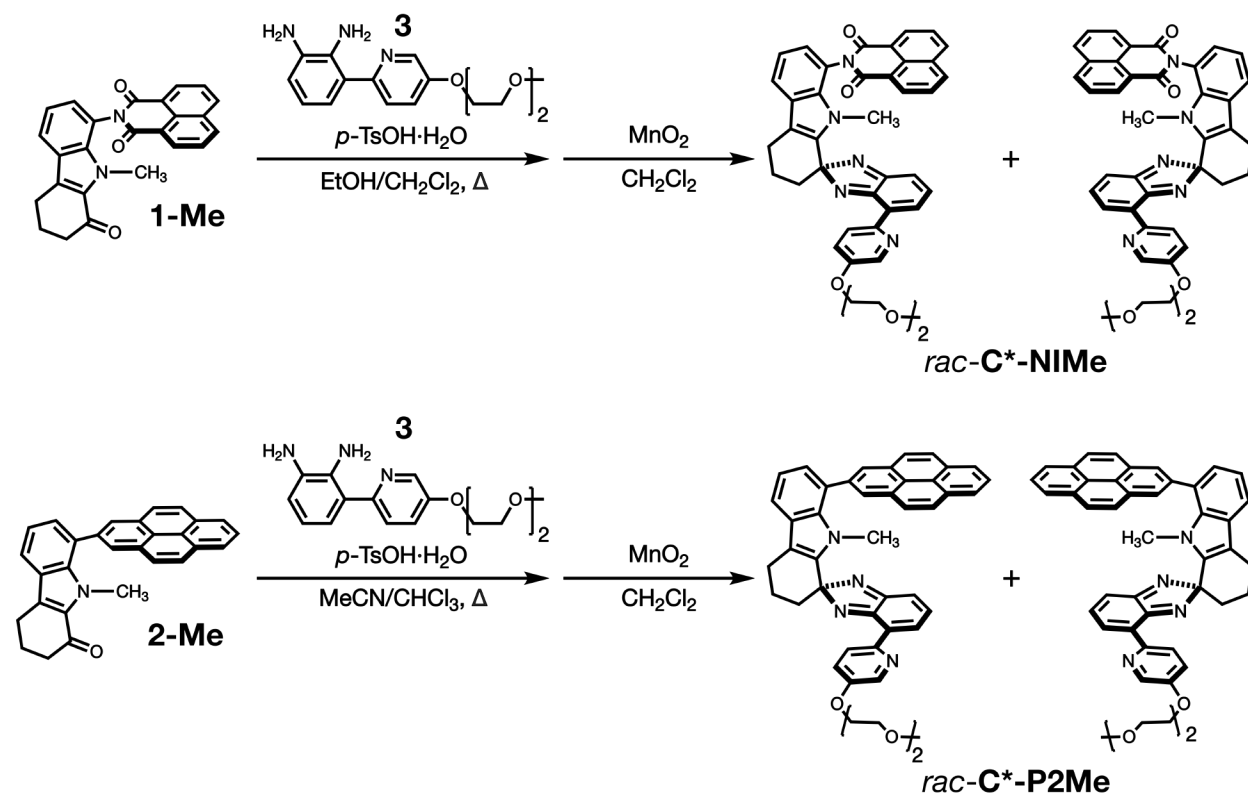

*rac*-2-(4-(5-(2-(2-Methoxyethoxy)ethoxy)pyridin-2-yl)-9'-methyl-2',3',4',9'-tetrahydrospiro[benzo[*d*]imidazole-2,1'-carbazol]-8'-yl)-1*H*-benzo[*de*]isoquinoline-1,3(2*H*)-dione (*rac-C\**-NIMe). An oven-dried 10–20 mL Biotage<sup>®</sup> Microwave Reaction Vial was loaded with **1-Me** (0.378 g, 0.960 mmol), **3** (0.350 g, 1.15 mmol), *p*-toluenesulfonic acid monohydrate (26.2 mg, 138  $\mu$ mol), anhyd EtOH (15.3 mL), and anhyd CH<sub>2</sub>Cl<sub>2</sub> (4.9 mL). The mixture was heated by microwave irradiation at 90 °C with stirring for 16 h, cooled to r.t., and concentrated under reduced pressure. The residual material was transferred into a oven-dried 250 mL round-bottom flask loaded with oven-dried MnO<sub>2</sub> (0.830 g, 9.55 mmol) and CH<sub>2</sub>Cl<sub>2</sub> (65 mL). The mixture was stirred at r.t. for 18 h, filtered through Celite, washed with water (100 mL  $\times$  3), dried over anhyd MgSO<sub>4</sub>, filtered, and concentrated under reduced pressure. Flash column chromatography on SiO<sub>2</sub> (CH<sub>2</sub>Cl<sub>2</sub>:EtOAc = 100:1 to 1:1, v/v) furnished *rac-C\**-NIMe as a yellow-orange solid (95.3 mg, 0.141 mmol, yield = 15%). <sup>1</sup>H NMR (500 MHz, CDCl<sub>3</sub>, 298 K):  $\delta$  8.76 (d, *J* = 8.8 Hz, 1H), 8.64 (d, *J* = 7.4, 1H), 8.61 (d, *J* = 7.3 Hz, 1H), 8.37 (d, *J* = 3.0 Hz, 1H), 8.27–8.22 (m, 2H), 7.96 (d, *J* = 6.6 Hz, 1H), 7.81–7.72 (m, 3H), 7.32–7.20 (m, 3H), 7.15 (dd, *J* = 9.4, 6.7 Hz, 1H), 7.05 (d, *J* = 7.4 Hz, 1H), 4.24 (t, *J* = 4.7 Hz, 2H), 3.92 (t, *J* = 4.9 Hz, 2H), 3.79–3.74 (m, 2H), 3.65–3.60 (m, 2H), 3.43 (s, 3H), 3.21–3.08 (m, 2H), 2.69 (s, 3H), 2.46–2.37 (m, 2H), 2.07–1.98 (m, 1H), 1.87–1.78 (m, 1H). <sup>13</sup>C NMR (125 MHz, CDCl<sub>3</sub>, 298 K):  $\delta$  164.65, 164.47, 161.99, 160.86, 154.98, 144.70, 138.47, 135.87, 134.32, 133.79, 133.49, 131.87, 131.85, 131.79, 131.59, 129.73, 128.57, 127.47, 127.03, 127.00, 125.79, 124.84, 123.74, 122.52, 122.50, 120.52, 119.89, 119.13, 119.01, 114.63, 105.44, 71.94, 70.86, 69.56, 67.86, 59.12, 36.45, 30.74, 23.68, 22.10. FT-IR (ATR, cm<sup>-1</sup>): 3069, 2926, 2881, 1706, 1670, 1586, 1561, 1529, 1492, 1475, 1455, 1436, 1406, 1373, 1348, 1305, 1284, 1262, 1236, 1218, 1188, 1137, 1125, 1115, 1070, 1059, 1028, 965, 918, 901, 847, 816, 781,

759, 735, 701, 645, 617, 603, 594, 534, 505. HRMS (ESI) calcd for C<sub>41</sub>H<sub>36</sub>N<sub>5</sub>O<sub>5</sub> [M + H]<sup>+</sup> 678.2711, found 678.2731.

***rac*-4-(5-(2-(2-Methoxyethoxy)ethoxy)pyridin-2-yl)-9'-methyl-8'-(pyren-2-yl)-2',3',4',9'-tetrahydrospiro[benzo[*d*]imidazole-2,1'-carbazole] (*rac*-C\*-P2Me).** An oven-dried 10–20 mL Biotage<sup>®</sup> Microwave Reaction Vial was loaded with **2-Me** (0.426 g, 1.07 mmol), **3** (0.338 g, 1.11 mmol), *p*-toluenesulfonic acid monohydrate (20.0 mg, 105 μmol), anhyd MeCN (17 mL), and CHCl<sub>3</sub> (3 mL). The mixture was heated by microwave irradiation at 90 °C with stirring for 28 h, cooled to r.t., and concentrated under reduced pressure. The residual material was transferred into an oven-dried 100 mL round-bottom flask loaded with oven-dried MnO<sub>2</sub> (4.250 g, 48.9 mmol) and CH<sub>2</sub>Cl<sub>2</sub> (30 mL). The mixture was stirred at r.t. for 36 h, filtered through Celite, washed with water (100 mL × 3), dried over anhyd MgSO<sub>4</sub>, filtered, and concentrated under reduced pressure. Flash column chromatography on SiO<sub>2</sub> (CH<sub>2</sub>Cl<sub>2</sub>:EtOAc = 100:1 to 2:3, v/v) furnished *rac*-C\*-P2Me as a yellow-orange solid (8.6 mg, 0.013 mmol, yield = 1% ). <sup>1</sup>H NMR (500 MHz, CDCl<sub>3</sub>, 298 K): δ 8.67 (d, *J* = 8.6 Hz, 1H), 8.32 (d, *J* = 2.7 Hz, 1H), 8.19–8.11 (m, 4H), 8.09–7.93 (m, 5H), 7.89 (d, *J* = 6.5 Hz, 1H), 7.70 (dd, *J* = 7.8, 1.8 Hz, 1H), 7.24–7.16 (m, 4H), 7.11 (dd, *J* = 9.2, 6.8 Hz, 1H), 4.22–4.18 (m, 2H), 3.90–3.87 (m, 2H), 3.74–3.71 (m, 2H), 3.61–3.56 (m, 2H), 3.39 (s, 3H), 3.18 (t, *J* = 6.3 Hz, 2H), 2.48–2.40 (m, 2H), 2.25 (s, 3H), 2.03–1.90 (m, 2H). <sup>13</sup>C NMR (125 MHz, CDCl<sub>3</sub>, 298 K): δ 162.32, 161.03, 155.06, 144.94, 138.75, 138.49, 136.13, 136.07, 133.89, 131.94, 131.17, 130.63, 128.00, 127.52, 127.42, 126.53, 126.43, 126.19, 125.98, 125.66, 125.25, 124.84, 124.63, 123.68, 120.71, 118.62, 118.35, 114.73, 105.68, 72.07, 71.00, 69.70, 67.98, 59.26, 36.45, 33.18, 23.91, 22.84, 22.25. FT-IR (ATR, cm<sup>-1</sup>): 3364, 3315, 3297, 3182, 3040, 3000, 2951, 2919, 2876, 2852, 1733, 1661, 1632, 1597, 1585, 1564, 1539, 1493, 1470, 1463, 1427, 1408, 1401, 1368, 1365, 1312, 1288, 1261, 1240, 1220, 1202, 1190, 1180, 1139, 1115, 1086, 1062, 1048, 1027, 998, 986, 966, 942, 913, 883, 857, 843, 819, 813, 802, 798, 781, 745, 718, 704, 696, 693, 682, 667, 664, 648, 642, 633, 612, 596. HRMS (ESI) calcd for C<sub>45</sub>H<sub>39</sub>N<sub>4</sub>O<sub>3</sub> [M + H]<sup>+</sup> 683.3017, found 683.3032.

**Scheme S3** Synthetic route to **3**

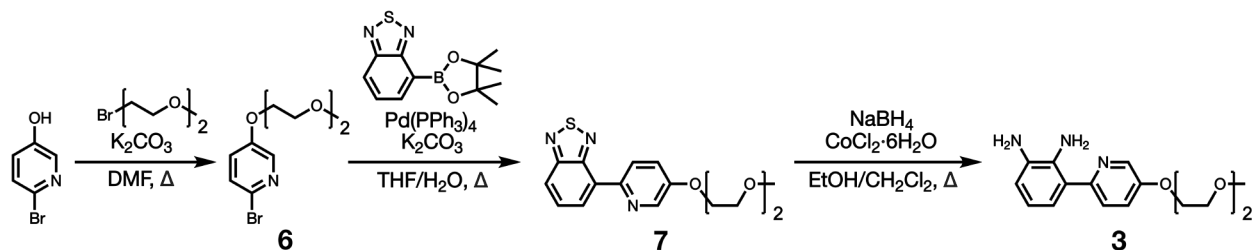

**3-(5-(2-(2-Methoxyethoxy)ethoxy)pyridin-2-yl)benzene-1,2-diamine (3).** To a solution of **7** (4.59 g, 13.8 mmol) in EtOH (280 mL) and CH<sub>2</sub>Cl<sub>2</sub> (70 mL) in a 500 mL round-bottom flask at r.t. were added NaBH<sub>4</sub> (5.24 g, 139 mmol) and CoCl<sub>2</sub>·6H<sub>2</sub>O (0.682 g, 2.87 mmol) portionwise over a period of 10 min. The reaction mixture was stirred at 50 °C for 1 h. After cooling to r.t., H<sub>2</sub>O (100 mL) was added, and the reaction mixture was stirred at r.t. for 10 min, filtered through Celite, and concentrated under reduced pressure. The residual material was taken up into CH<sub>2</sub>Cl<sub>2</sub> (250 mL), washed with water (150 mL × 3), dried over anhyd MgSO<sub>4</sub>, filtered, and concentrated under reduced pressure. Flash column chromatography on SiO<sub>2</sub> (CH<sub>2</sub>Cl<sub>2</sub>:EtOAc = 100:1 to 0:1 → EtOAc:MeOH = 1:0 to 98:2, v/v) furnished **3** as a yellow oil (3.25 g, 10.7 mmol, yield = 78%). <sup>1</sup>H NMR (500 MHz, CDCl<sub>3</sub>, 298 K): δ 8.34 (d, *J* = 3.0 Hz, 1H), 7.59 (d, *J* = 8.8 Hz, 1H), 7.33 (dd, *J* = 8.7, 3.0 Hz, 1H), 7.04 (dd, *J* = 7.2, 2.2 Hz, 1H), 6.76–6.68 (m, 2H), 5.27 (br, 2H), 4.26–4.21 (m, 3H), 3.93–3.87 (m, 2H), 3.77–3.71 (m, 2H), 3.62–3.57 (m, 2H), 3.52–3.33 (m, 3H). <sup>13</sup>C NMR (125 MHz, CDCl<sub>3</sub>, 298 K): δ 153.11, 152.32, 135.47, 135.34, 135.19, 123.62, 123.19, 122.90, 120.65, 118.36, 116.51, 71.97, 70.87, 69.70, 67.96, 59.13. FT-IR (ATR, cm<sup>-1</sup>): 3407, 3338, 3255, 3061, 3030, 2980, 2926, 2879, 2823, 1734, 1611, 1560, 1489, 1461, 1386, 1355, 1267, 1243, 1219, 1200, 1125, 1105, 1053, 1026, 940, 923, 844, 802, 788, 752, 732, 674, 644, 609, 591, 552. HRMS (ESI) calcd for C<sub>16</sub>H<sub>22</sub>N<sub>3</sub>O<sub>3</sub> [M + H]<sup>+</sup> 304.1656, found 304.1659.

**4-(5-(2-(2-Methoxyethoxy)ethoxy)pyridin-2-yl)benzo[*c*][1,2,5]thiadiazole (7).** A 250 mL round-bottom flask was loaded with benzo[*c*]-1,2,5-thiadiazole-4-(boronic acid pinacol ester) (3.41 g, 13.0 mmol), **6** (3.88 g, 14.1 mmol), Pd(PPh<sub>3</sub>)<sub>4</sub> (0.813 g, 0.704 mmol), K<sub>2</sub>CO<sub>3</sub> (5.43 g, 39.3 mmol) in THF (130 mL) and H<sub>2</sub>O (26 mL). The mixture was bubbled with Ar for 5 min, and heated at reflux for 16 h, cooled to r.t., filtrated through Celite, and concentrated under reduced pressure. The residual material was taken up into CH<sub>2</sub>Cl<sub>2</sub> (200 mL), washed with water (150 mL × 3), dried over anhyd MgSO<sub>4</sub>, filtered, and concentrated under reduced pressure. Flash column chromatography on SiO<sub>2</sub> (hexane:EtOAc = 100:1 to 1:1, v/v) furnished **7** as a yellow solid (3.03 g, 9.14 mmol, yield = 70%). <sup>1</sup>H NMR (400 MHz, CDCl<sub>3</sub>, 298 K): δ 8.63 (d, *J* = 8.8 Hz, 1H), 8.50 (d, *J* = 2.9 Hz, 1H), 8.36 (d, *J* = 6.8 Hz, 1H), 8.03 (d, *J* = 8.6 Hz, 1H), 7.73 (dd, *J* = 8.8, 7.1 Hz, 1H), 7.39 (dd, *J* = 8.7, 3.0 Hz, 1H), 4.28 (t, *J* = 4.8 Hz, 2H), 3.93 (t, *J* = 4.8 Hz, 2H), 3.77–3.70 (m, 2H), 3.64–3.57 (m, 2H), 3.39 (s, 3H). <sup>13</sup>C NMR (125 MHz, CDCl<sub>3</sub>, 298 K): δ 155.97, 154.80, 153.04, 146.92, 138.43, 132.02, 129.94, 128.44, 125.41, 121.41, 121.33, 72.10, 71.03, 69.77, 68.09, 59.27. FT-IR (ATR, cm<sup>-1</sup>): 3061, 2980, 2928, 2883, 2834, 2810, 2742, 2521, 1587, 1569, 1535, 1471, 1447, 1420, 1411, 1381, 1360, 1328, 1318, 1307, 1293, 1262, 1231, 1212, 1139, 1130, 1124, 1107, 1087, 1059, 1044, 1021, 932, 920, 912, 900, 855, 835, 819, 768, 749, 732, 647, 610, 552, 528, 505, 486, 465, 441, 415. HRMS (ESI) calcd for C<sub>16</sub>H<sub>18</sub>N<sub>3</sub>O<sub>3</sub>S [M + H]<sup>+</sup> 332.1064, found 332.1069.

**2-Bromo-5-(2-(2-methoxyethoxy)ethoxy)pyridine (6).** A mixture of 6-bromopyridin-3-ol (3.74 g, 16.3 mmol), 1-bromo-2-(2-methoxyethoxy)ethane (2.6 mL, 19 mmol), and K<sub>2</sub>CO<sub>3</sub> (8.89 g,

64.3 mmol) in DMF (50 mL) was heated at 80 °C for 16 h, cooled to r.t., and concentrated under reduced pressure. The residual material was taken up into CH<sub>2</sub>Cl<sub>2</sub> (200 mL), washed with water (150 mL × 5), dried over anhyd MgSO<sub>4</sub>, filtered, and concentrated under reduced pressure. Flash column chromatography on SiO<sub>2</sub> (hexane:EtOAc = 1:0 to 1:1, v/v) furnished **6** as a white solid (4.26 g, 15.4 mmol, yield = 72% ). <sup>1</sup>H NMR (500 MHz, CDCl<sub>3</sub>, 298 K): δ 8.07 (d, *J* = 3.2 Hz, 1H), 7.35 (d, *J* = 8.7 Hz, 1H), 7.13 (dd, *J* = 8.7, 3.2 Hz, 1H), 4.19–4.13 (m, 2H), 3.88–3.83 (m, 2H), 3.73–3.67 (m, 2H), 3.59–3.54 (m, 2H), 3.38 (s, 3H). <sup>13</sup>C NMR (125 MHz, CDCl<sub>3</sub>, 298 K): δ 154.93, 137.76, 132.49, 128.25, 125.27, 72.07, 71.01, 69.69, 68.40, 59.26. FT-IR (ATR, cm<sup>-1</sup>): 3088, 3067, 2983, 2926, 2894, 2817, 1577, 1566, 1470, 1449, 1368, 1355, 1270, 1235, 1226, 1200, 1136, 1123, 1103, 1091, 1055, 1027, 1010, 983, 946, 923, 891, 850, 839, 811, 722, 653, 620, 522, 422. HRMS (ESI) calcd for C<sub>10</sub>H<sub>15</sub>BrNO<sub>3</sub> [M + H]<sup>+</sup> 276.0230, found 276.0234.



Scheme S4 Synthetic route to **5**.

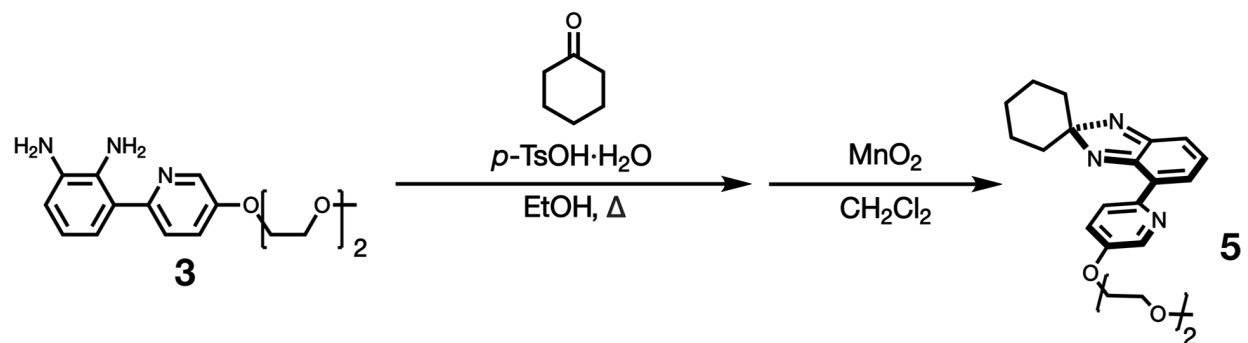

**4-(5-(2-(2-Methoxyethoxy)ethoxy)pyridin-2-yl)spiro[benzo[*d*]imidazole-2,1'-cyclohexane] (5).** An oven-dried 100 mL round-bottom flask was loaded with **3** (0.142 g, 0.468 mmol), cyclohexanone (46  $\mu$ L, 0.44 mmol), *p*-toluenesulfonic acid monohydrate (9.4 mg, 49  $\mu$ mol), and anhyd EtOH (34 mL). The mixture was heated at reflux for 19 h, cooled to r.t., and concentrated under reduced pressure. The residual material was transferred into an oven-dried 100 mL round-bottom flask loaded with oven-dried MnO<sub>2</sub> (0.390 g, 4.49 mmol) and CH<sub>2</sub>Cl<sub>2</sub> (30 mL). The mixture was stirred at r.t. for 2 h, filtered through Celite, washed with water (100 mL  $\times$  3), dried over anhyd MgSO<sub>4</sub>, filtered, and concentrated under reduced pressure. Flash column chromatography on SiO<sub>2</sub> (EtOAc isocratic flow) furnished **5** as a yellow-orange solid (54.0 mg, 0.142 mmol, yield = 32%). <sup>1</sup>H NMR (400 MHz, CDCl<sub>3</sub>, 298 K):  $\delta$  8.70 (d, *J* = 8.7 Hz, 1H), 8.38 (d, *J* = 3.0 Hz, 1H), 7.94 (d, *J* = 6.5 Hz, 1H), 7.28 (dd, *J* = 8.8, 3.0 Hz, 1H), 7.22 (d, *J* = 9.2 Hz, 1H), 7.16 (dd, *J* = 9.3, 6.5 Hz, 1H), 4.23 (t, *J* = 4.8 Hz, 2H), 3.90 (t, *J* = 4.8 Hz, 2H), 3.73 (dd, *J* = 5.8, 3.5 Hz, 2H), 3.58 (dd, *J* = 5.7, 3.6 Hz, 2H), 3.39 (s, 3H), 2.05–1.92 (m, 4H), 1.87–1.51 (m, 6H). <sup>13</sup>C NMR (125 MHz, CDCl<sub>3</sub>, 298 K):  $\delta$  160.18, 158.67, 154.92, 145.64, 138.39, 135.23, 134.25, 131.26, 125.53, 125.42, 120.79, 107.43, 72.07, 71.00, 69.74, 67.99, 59.23, 33.06, 25.86, 25.03. FT-IR (ATR, cm<sup>-1</sup>): 3068, 2931, 2890, 2878, 2855, 2823, 2527, 1737, 1588, 1575, 1562, 1531, 1491, 1477, 1448, 1407, 1394, 1356, 1333, 1307, 1285, 1264, 1215, 1201, 1170, 1136, 1111, 1060, 1033, 957, 947, 914, 848, 830, 815, 789, 749, 705, 684, 641, 628, 566, 550, 528, 493, 460, 446, 417. HRMS (ESI) calcd for C<sub>22</sub>H<sub>28</sub>N<sub>3</sub>O<sub>3</sub> [M + H]<sup>+</sup> 382.2126, found 382.2132.

**X-ray Crystallographic Studies on *meso*-[C\*-NI]<sub>2</sub>.** Single crystals of *meso*-[C\*-NI]<sub>2</sub> were obtained by slow evaporation of a CH<sub>2</sub>Cl<sub>2</sub>–toluene (1:1, v/v) solution of *rac*-C\*-NI at r.t. A yellow crystal (approximate dimensions 0.178 × 0.167 × 0.160 mm<sup>3</sup>) was placed onto a nylon loop with Paratone-N oil, and mounted on a Bruker single Crystal X-ray diffractometer. The data collection was carried out using Mo K $\alpha$  radiation, and the crystal was kept at 100.0 K. A total of 33857 reflections were measured (4.224° ≤ 2 $\theta$  ≤ 52.720°). The structure was solved with the SHELXT<sup>3</sup> structure solution program using intrinsic phasing, and refined with the SHELXL<sup>4</sup> refinement package of OLEX2.<sup>5</sup> The final refinements of *meso*-[C\*-NI]<sub>2</sub> were performed using the SQUEEZE routine of PLATON package.<sup>6</sup> A total of 7569 unique reflections were used in all calculations. The final *R*1 was 0.0787 (*I* ≥ 2 $\sigma$ (*I*)), and *wR*2 was 0.2743 (all data). C<sub>40</sub>H<sub>33</sub>N<sub>5</sub>O<sub>5</sub>·C<sub>7</sub>H<sub>8</sub>, *M* = 755.88 g/mol, monoclinic, *P*2<sub>1</sub>/*n* (no. 14), *a* = 13.0754(15) Å, *b* = 19.067(2) Å, *c* = 15.680(2) Å,  $\beta$  = 104.258(4)°, *V* = 3788.7(8) Å<sup>3</sup>, *Z* = 4, *D*<sub>c</sub> = 1.325 g/cm<sup>3</sup>. CCDC 2369723 contains the supplementary crystallographic data for this structure.

**X-ray Crystallographic Studies on *meso*-[C\*-P2]<sub>2</sub>.** Single crystals of *meso*-[C\*-P2]<sub>2</sub> were obtained by vapor diffusion of methyl *tert*-butyl ether into a CHCl<sub>3</sub> solution of the material at r.t. A yellow crystal (approximate dimensions 0.171 × 0.074 × 0.035 mm<sup>3</sup>) was coated with Immersion Oil Type NVH to mount on the micro-loop under cold nitrogen stream at *T* = 100 K. The diffraction data measured using synchrotron radiation ( $\lambda$  = 0.70000 Å) employing a PLSII-2D SMC on a Rayonix SX165 CCD area detector with high precision one-axis goniostat at Pohang Accelerator Laboratory, Korea. The PAL BL2D-SMDC program<sup>7</sup> was used for data collection, and HKL3000sm (Ver.717)<sup>8</sup> was used for cell refinement, reduction, and absorption correction. A total of 65136 reflections were measured (3.718° ≤ 2 $\theta$  ≤ 59.526°). The structure was solved with the SHELXT<sup>3</sup> structure solution program using intrinsic phasing, and refined with the SHELXL<sup>4</sup> refinement package of OLEX2.<sup>5</sup> A total of 9816 unique reflections were used in all calculations. The final *R*1 was 0.0564 (*I* ≥ 2 $\sigma$ (*I*)), and *wR*2 was 0.1562 (all data). C<sub>44</sub>H<sub>36</sub>N<sub>4</sub>O<sub>3</sub>, *M* = 668.80 g/mol, orthorhombic, *Pbca* (no. 61), *a* = 15.283(3) Å, *b* = 14.723(3) Å, *c* = 30.471(6) Å, *V* = 6856(2) Å<sup>3</sup>, *Z* = 8, *D*<sub>c</sub> = 1.296 g/cm<sup>3</sup>. CCDC 2369724 contains the supplementary crystallographic data for this structure.

**X-ray Crystallographic Studies on (*R*)-C\*-P2@(*S*)-C\*-NI.** Single crystals of (*R*)-C\*-P2@(*S*)-C\*-NI were obtained by vapor diffusion of Et<sub>2</sub>O into a CHCl<sub>3</sub> solution of an equimolar mixture of (*R*)-C\*-P2 and (*S*)-C\*-NI at r.t. A yellow crystal (approximate dimensions 0.271 × 0.221 × 0.065 mm<sup>3</sup>) was coated with Immersion Oil Type NVH to mount on the micro-loop under cold nitrogen stream at *T* = 100 K. The diffraction data measured using synchrotron radiation ( $\lambda$  = 0.70000 Å) employing a PLSII-2D SMC on a Rayonix SX165 CCD area detector with high precision one-axis goniostat at Pohang Accelerator Laboratory, Korea. The PAL BL2D-SMDC program<sup>7</sup> was used for data collection, and HKL3000sm (Ver.717)<sup>8</sup> was used for cell refinement, reduction, and absorption correction. A total of 66130 reflections were measured (2.974° ≤ 2 $\theta$  ≤ 59.462°). The structure was solved with the SHELXT<sup>3</sup> structure solution program using intrinsic phasing, and refined with the SHELXL<sup>4</sup> refinement package of OLEX2.<sup>5</sup> A total of 18822 unique reflections were used in all calculations. The final *R*1 was 0.0682 (*I* ≥ 2 $\sigma$ (*I*)), and *wR*2 was 0.1789 (all data).

<sup>3</sup>G. M. Sheldrick, *Acta Cryst.*, 2015, **A71**, 3–8.

<sup>4</sup>G. M. Sheldrick, *Acta Cryst.*, 2015, **C71**, 3–8.

<sup>5</sup>O. V. Dolomanov, L. J. Bourhis, R. J. Gildea, J. A. K. Howard, and H. Puschmann, *J. Appl. Cryst.*, 2009, **42**, 339–341.

<sup>6</sup>A. L. Spek, *Acta Cryst.* 2009, **D65**, 148–155.

<sup>7</sup>J. W. Shin, K. Eom, and D. Moon, *J. Synchrotron Rad.*, 2016, **23**, 369–373.

<sup>8</sup>Z. Otwinowski, *Methods Enzymol.*, 1997, **276**, 307–326.

$C_{84}H_{69}N_9O_8$ ,  $M = 1331.53$  g/mol, orthorhombic,  $P2_12_12_1$  (no. 19),  $a = 14.434(3)$  Å,  $b = 15.041(3)$  Å,  $c = 30.493(6)$  Å,  $V = 6620(2)$  Å<sup>3</sup>,  $Z = 4$ ,  $D_c = 1.337$  g/cm<sup>3</sup>. CCDC 2369725 contains the supplementary crystallographic data for this structure.

**X-ray Crystallographic Studies on *rac*-[C\*-P2⊃PHD].** Single crystals of *rac*-[C\*-P2⊃PHD] were obtained by vapor diffusion of pentane into a toluene solution of 1:4 molar ratio mixture of *rac*-C\*-P2 and 1,10-phenanthroline-5,6-dione at r.t. A red crystal (approximate dimensions  $0.070 \times 0.060 \times 0.020$  mm<sup>3</sup>) was coated with Immersion Oil Type NVH to mount on the micro-loop under cold nitrogen stream at  $T = 100$  K. The diffraction data measured using synchrotron radiation ( $\lambda = 0.70000$  Å) employing a PLSII-2D SMC on a Rayonix SX165 CCD area detector with high precision one-axis goniostat at Pohang Accelerator Laboratory, Korea. The PAL BL2D-SMDC program<sup>7</sup> was used for data collection, and HKL3000sm (Ver.717)<sup>8</sup> was used for cell refinement, reduction, and absorption correction. A total of 46476 reflections were measured ( $3.006^\circ \leq 2\theta \leq 59.676^\circ$ ). The structure was solved with the SHELXT<sup>3</sup> structure solution program using intrinsic phasing, and refined with the SHELXL<sup>4</sup> refinement package of OLEX2.<sup>5</sup> A total of 23370 unique reflections were used in all calculations. The final  $R1$  was 0.1025 ( $I \geq 2\sigma(I)$ ), and  $wR2$  was 0.3123 (all data).  $C_{56}H_{42}N_6O_5$ ,  $M = 878.99$  g/mol, triclinic,  $P\bar{1}$  (no. 2),  $a = 8.4180(17)$  Å,  $b = 12.809(3)$  Å,  $c = 40.083(8)$  Å,  $V = 4131.5(17)$  Å<sup>3</sup>,  $Z = 4$ ,  $D_c = 1.413$  g/cm<sup>3</sup>. CCDC 2369726 contains the supplementary crystallographic data for this structure.

**Table S1.** Summary of X-Ray Crystallographic Data.

|                                                        | <i>meso</i> -[C*-NI] <sub>2</sub>                                                            | <i>meso</i> -[C*-P2] <sub>2</sub>                             |
|--------------------------------------------------------|----------------------------------------------------------------------------------------------|---------------------------------------------------------------|
| Chemical formula                                       | C <sub>40</sub> H <sub>33</sub> N <sub>5</sub> O <sub>5</sub> ·C <sub>7</sub> H <sub>8</sub> | C <sub>44</sub> H <sub>36</sub> N <sub>4</sub> O <sub>3</sub> |
| Formula weight                                         | 755.88                                                                                       | 668.80                                                        |
| Crystal system                                         | monoclinic                                                                                   | orthorhombic                                                  |
| Space group                                            | <i>P</i> 2 <sub>1</sub> / <i>n</i>                                                           | <i>Pbca</i>                                                   |
| Color of crystal                                       | Yellow                                                                                       | Yellow                                                        |
| a (Å)                                                  | 13.0754(15)                                                                                  | 15.283(3)                                                     |
| b (Å)                                                  | 19.067(2)                                                                                    | 14.723(3)                                                     |
| c (Å)                                                  | 15.680(2)                                                                                    | 30.471(6)                                                     |
| α (°)                                                  | -                                                                                            | -                                                             |
| β (°)                                                  | 104.258(4)                                                                                   | -                                                             |
| γ (°)                                                  | -                                                                                            | -                                                             |
| Volume (Å <sup>3</sup> )                               | 3788.7(8)                                                                                    | 6856(2)                                                       |
| <i>Z</i>                                               | 4                                                                                            | 8                                                             |
| <i>R</i> <sub>int</sub>                                | 0.0715                                                                                       | 0.1052                                                        |
| Final <i>R</i> indices<br>[ <i>I</i> ≥ 2σ( <i>I</i> )] | <i>R</i> 1 = 0.0787,<br><i>wR</i> 2 = 0.2005                                                 | <i>R</i> 1 = 0.0564,<br><i>wR</i> 2 = 0.1427                  |
| Final <i>R</i> indices<br>[all data]                   | <i>R</i> 1 = 0.1369,<br><i>wR</i> 2 = 0.2743                                                 | <i>R</i> 1 = 0.0922,<br><i>wR</i> 2 = 0.1562                  |
| GOF                                                    | 1.084                                                                                        | 1.020                                                         |
|                                                        | ( <i>R</i> )-C*-P2@( <i>S</i> )-C*-NI                                                        | <i>rac</i> -[C*-P2⊃PHD]                                       |
| Chemical formula                                       | C <sub>84</sub> H <sub>69</sub> N <sub>9</sub> O <sub>8</sub>                                | C <sub>56</sub> H <sub>42</sub> N <sub>6</sub> O <sub>5</sub> |
| Formula weight                                         | 1331.53                                                                                      | 878.99                                                        |
| Crystal system                                         | orthorhombic                                                                                 | triclinic                                                     |
| Space group                                            | <i>P</i> 2 <sub>1</sub> 2 <sub>1</sub> 2 <sub>1</sub>                                        | <i>P</i> $\bar{1}$                                            |
| Color of crystal                                       | Yellow                                                                                       | Red                                                           |
| a (Å)                                                  | 14.434(3)                                                                                    | 8.4180(17)                                                    |
| b (Å)                                                  | 15.041(3)                                                                                    | 12.809(3)                                                     |
| c (Å)                                                  | 30.493(6)                                                                                    | 40.083(8)                                                     |
| α (°)                                                  | -                                                                                            | 91.42(3)                                                      |
| β (°)                                                  | -                                                                                            | 92.29(3)                                                      |
| γ (°)                                                  | -                                                                                            | 106.79(3)                                                     |
| Volume (Å <sup>3</sup> )                               | 6620(2)                                                                                      | 4131.5(17)                                                    |
| <i>Z</i>                                               | 4                                                                                            | 4                                                             |
| <i>R</i> <sub>int</sub>                                | 0.1244                                                                                       | 0.0449                                                        |
| Final <i>R</i> indices<br>[ <i>I</i> ≥ 2σ( <i>I</i> )] | <i>R</i> 1 = 0.0682,<br><i>wR</i> 2 = 0.1569                                                 | <i>R</i> 1 = 0.1025,<br><i>wR</i> 2 = 0.2804                  |
| Final <i>R</i> indices<br>[all data]                   | <i>R</i> 1 = 0.1040,<br><i>wR</i> 2 = 0.1789                                                 | <i>R</i> 1 = 0.1474,<br><i>wR</i> 2 = 0.3123                  |
| GOF                                                    | 1.036                                                                                        | 1.046                                                         |
| Absolute structure parameter                           | -0.1(6)                                                                                      | -                                                             |

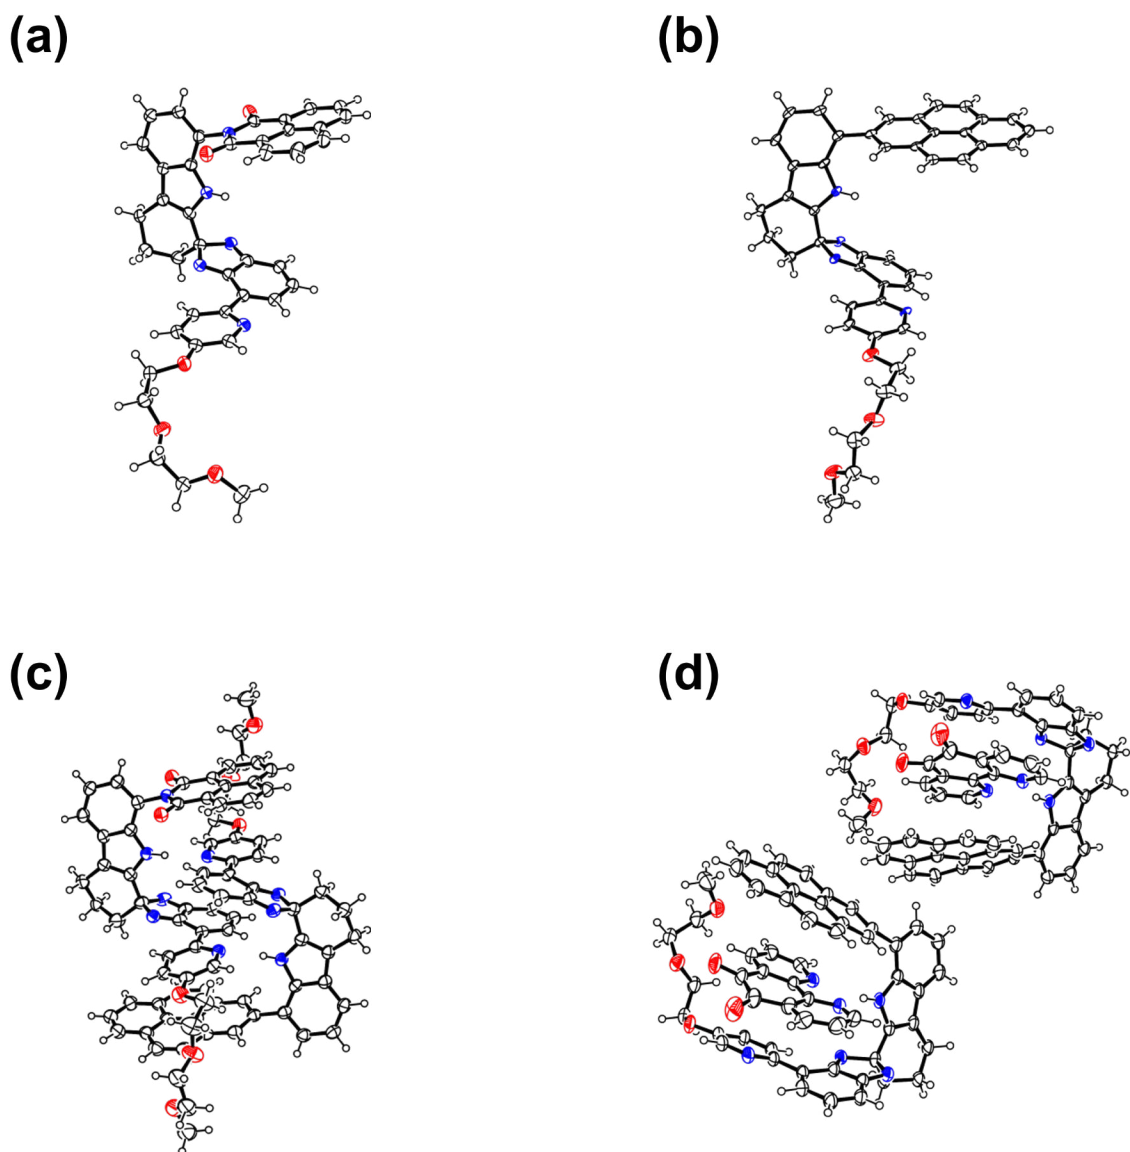

**Fig. S1** ORTEP diagrams of (a) (*S*)-**C\***-**NI** component of *meso*-[**C\***-**NI**]<sub>2</sub>, (b) (*S*)-**C\***-**P2** component of *meso*-[**C\***-**P2**]<sub>2</sub>, (c) (*R*)-**C\***-**P2**@(*S*)-**C\***-**NI**, and (d) *rac*-[**C\***-**P2**⊃PHD] with thermal ellipsoids at the 50% probability level.

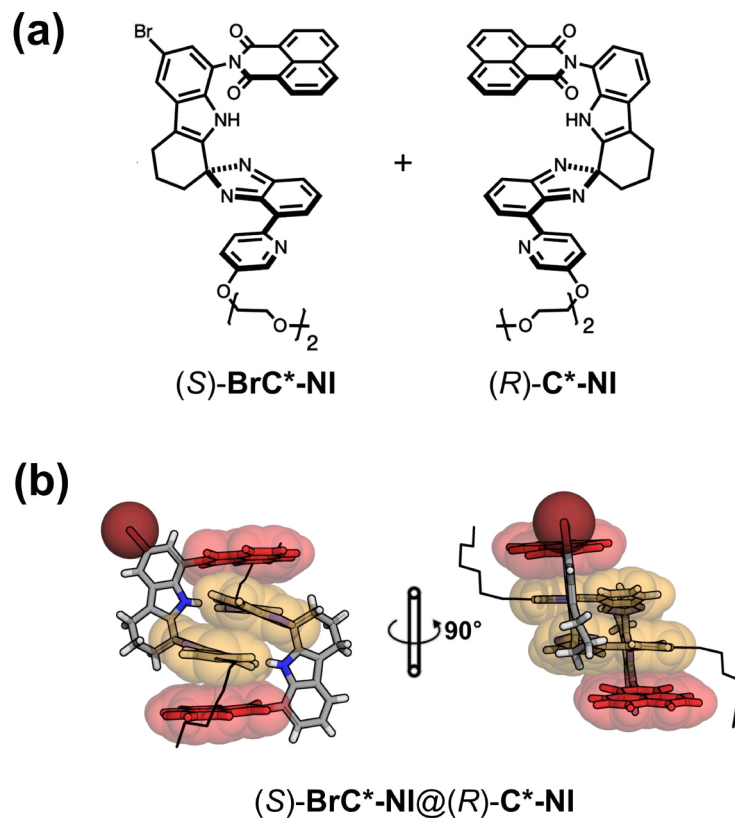

**Fig. S2** (a) Chemical structure of (*S*)-BrC\*-NI and (*R*)-C\*-NI, (b) capped-stick representations of the X-ray structures of quasi-racemate (*S*)-BrC\*-NI@(R)-C\*-NI with vdW surfaces overlaid on the stacked aromatic regions and Br atom, and ether chains simplified as wireframes. Absolute structure parameter (Parson's q value) is 0.098(6). Space group *P*1 with  $a = 16.540(3) \text{ \AA}$ ,  $b = 17.007(3) \text{ \AA}$ ,  $c = 17.482(4) \text{ \AA}$ ,  $\alpha = 63.23(3)^\circ$ ,  $\beta = 63.24(3)^\circ$ ,  $\gamma = 83.74(3)^\circ$ ,  $V = 3893(2) \text{ \AA}^3$ ,  $Z = 2$ ,  $Z' = 2$ ,  $R1 = 0.0840$ ,  $wR2 = 0.2639$ .

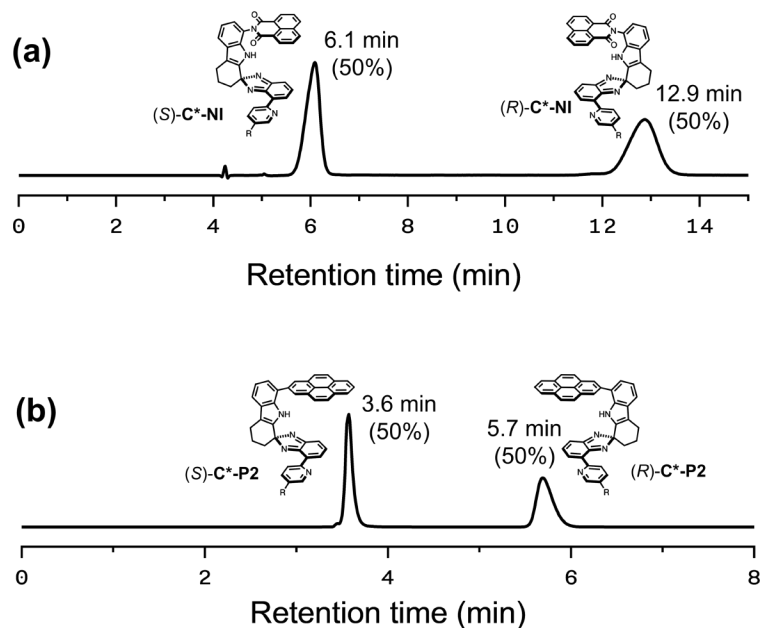

**Fig. S3** HPLC chromatograms of (a) *rac*-C\*-NI (*n*-hexane:CHCl<sub>3</sub>:EtOH = 40:30:30, v/v/v, *T* = 298 K, flow rate = 0.8 mL/min) and (b) *rac*-C\*-P2 (*n*-hexane:CHCl<sub>3</sub>:EtOH = 25:50:25, v/v/v, *T* = 298 K, flow rate = 1.0 mL/min) using a CHIRALPAK IM ( $\phi=4.6$  mm,  $l=250$  mm) column and recorded as the absorption of 410 nm light. Retention time of each peak is provided along with the percentage of each peak area.

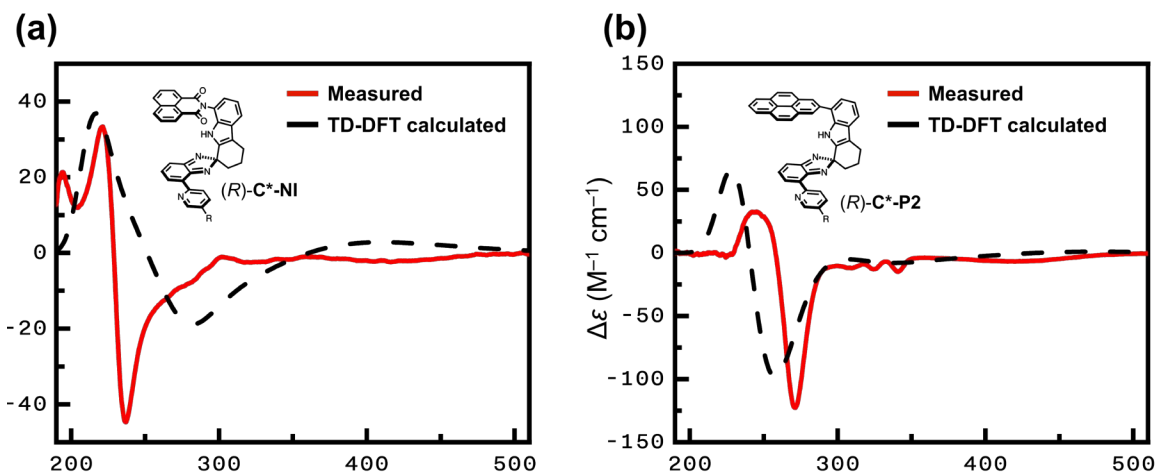

**Fig. S4** CD spectra of (a) (*R*)-**C\*<sup>-</sup>NI** measured in CH<sub>3</sub>CN and (b) (*R*)-**C\*<sup>-</sup>P2** measured in CHCl<sub>3</sub> at *T* = 298 K (red lines). Computed CD spectra using DFT functional BHandHLYP/def2TZVP are overlaid (black dashed lines). Solvation was considered by self-consistent reaction field (SCRF) calculations with conductor-like polarizable continuum model (CPCM) of CH<sub>3</sub>CN ( $\epsilon = 35.7$ ) for (*R*)-**C\*<sup>-</sup>NI** and CHCl<sub>3</sub> ( $\epsilon = 4.71$ ) for (*R*)-**C\*<sup>-</sup>P2**.<sup>9</sup>

<sup>9</sup>J. Tomasi, B. Mennucci, and R. Cammi *Chem. Rev.*, 2005, **105**, 2999–3094.



### Supplementary Note 1. Determining the Homochiral Dimerization (= Self-Association) Constant ( $K_{\text{homo}}$ )

The self-association constant of enantiopure clip was determined by fitting the changes in the chemical shifts in the  $^1\text{H}$  NMR spectra as a function of the sample concentration. The solution population reflects the following equilibrium. (*R*)- $\text{C}^*$  (= *R*) can self-associate to form  $\text{R}_2$ .

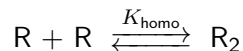

$$K_{\text{homo}} = \frac{[\text{R}_2]}{[\text{R}]^2} \quad (1)$$

$$[\text{R}] = \frac{\sqrt{1 + 8K_{\text{homo}}[\text{R}]_0} - 1}{4K_{\text{homo}}} \quad (2)$$

$$[\text{R}_2] = K_{\text{homo}} \left( \frac{\sqrt{1 + 8K_{\text{homo}}[\text{R}]_0} - 1}{4K_{\text{homo}}} \right)^2 \quad (3)$$

$$\delta_{\text{obs}} = \left( \frac{\sqrt{1 + 8K_{\text{homo}}[\text{R}]_0} - 1}{4K_{\text{homo}}} \right) \frac{\delta_{\text{R}}}{[\text{R}]_0} + 2K_{\text{homo}} \left( \frac{\sqrt{1 + 8K_{\text{homo}}[\text{R}]_0} - 1}{4K_{\text{homo}}} \right)^2 \frac{\delta_{\text{R}_2}}{[\text{R}]_0} \quad (4)$$

Here, the terms  $\delta_{\text{obs}}$ ,  $\delta_{\text{R}}$ , and  $\delta_{\text{R}_2}$  denote the observed chemical shift (resulting from the fast exchange between *R* and  $\text{R}_2$ ), chemical shift of the (*R*)-form of the monomeric (= free) clip *R*, and chemical shift of the homochiral dimeric (= self-associated)  $\text{R}_2$ , respectively.

All  $^1\text{H}$  NMR (400 MHz) spectra were obtained in  $\text{CDCl}_3$  to monitor concentration-dependent changes in the  $\delta_{\text{obs}}$  value of one or more distinguishable proton resonances at  $T = 298$  K. A numerical fittings were carried out by using non-linear least-squares regression analysis<sup>10</sup> with eq (4) to obtain  $K_{\text{homo}}$ ,  $\delta_{\text{R}}$ , and  $\delta_{\text{R}_2}$ . The  $K_{\text{homo}}$  value was determined as  $6.2 \text{ M}^{-1}$  for  $\text{C}^*\text{-P2}$  and  $1.3 \times 10^3 \text{ M}^{-1}$  for  $\text{C}^*\text{-NI}$ , respectively.

<sup>10</sup>Non-linear least-squares regression analysis software was Origin2017; OriginLap Corp.: Northampton, MA.

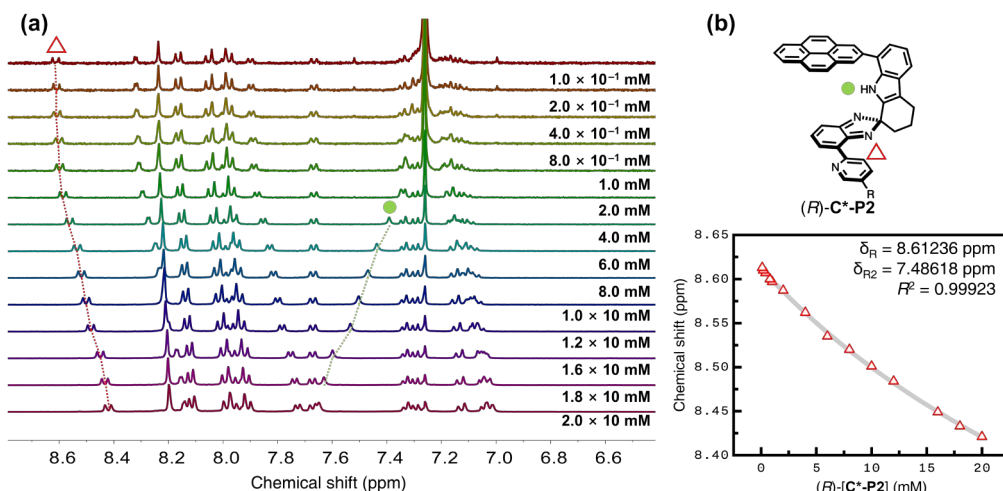

**Fig. S5** (a) Partial  $^1\text{H}$  NMR spectra of  $(R)\text{-C}^*\text{-P2}$  at different concentrations in  $\text{CDCl}_3$  measured at  $T = 298$  K. (b) Changes in the chemical shift of the  $\text{H}_{3\text{-pyridine}}$  proton resonance ( $\triangle$ ) as a function of the sample concentration  $[(R)\text{-C}^*\text{-P2}]$ . The theoretical curve with  $K_{\text{homo}} = 6.2 \text{ M}^{-1}$  is superimposed on the data points.

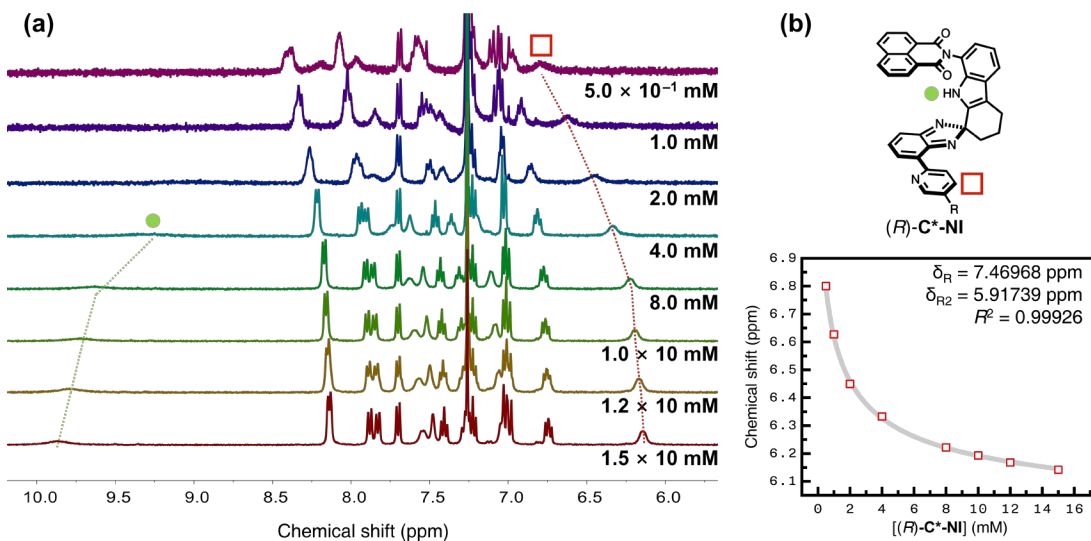

**Fig. S6** (a) Partial  $^1\text{H}$  NMR spectra of  $(R)\text{-C}^*\text{-NI}$  at different concentrations in  $\text{CDCl}_3$  measured at  $T = 298$  K. (b) Changes in the chemical shift of the  $\text{H}_{4\text{-pyridine}}$  proton resonance ( $\square$ ) as a function of the sample concentration  $[(R)\text{-C}^*\text{-NI}]$ . The theoretical curve with  $K_{\text{homo}} = 1.3 \times 10^3 \text{ M}^{-1}$  is superimposed on the data points.

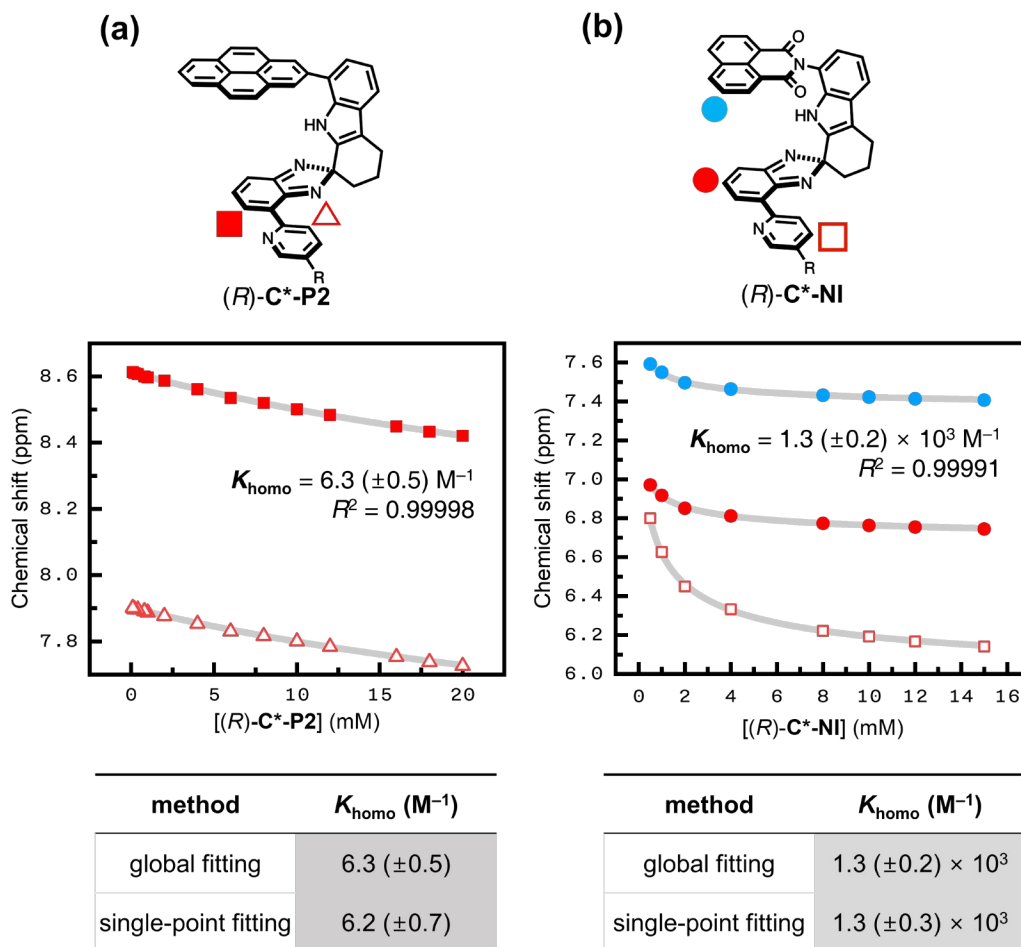

**Fig. S7** Changes in the chemical shifts of (a) (*R*)-C\*-P2, and (b) (*R*)-C\*-NI as a function of the sample concentration. In each plot, the theoretical curves with the dimerization constant  $K_{\text{homo}}$  are superimposed on the data points; results from global fitting and single-point fitting are compared in the table below. Proton resonances are labeled with the symbols denoted in the chemical structures.

**Supplementary Note 2. Determining the Heterochiral Dimerization Constant ( $K_{\text{hetero}}$ ) of C\*-P2**

The heterochiral dimerization constant of the racemic sample was determined by fitting the changes in the chemical shifts in the  $^1\text{H}$  NMR spectra as a function of the sample concentration. The solution population reflects the following equilibrium. (*R*)-C\* (= R) can either (i) self-associate to form  $\text{R}_2$ , or (ii) associated with its mirror image clip (*S*)-C\* (= S) to afford RS.

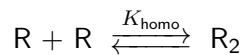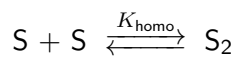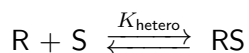

$$K_{\text{homo}} = \frac{[\text{R}_2]}{[\text{R}]^2} \quad (1)$$

$$K_{\text{homo}} = \frac{[\text{S}_2]}{[\text{S}]^2} \quad (5)$$

$$K_{\text{hetero}} = \frac{[\text{RS}]}{[\text{R}][\text{S}]} \quad (6)$$

$$[\text{R}]_0 = [\text{R}] + 2[\text{R}_2] + [\text{RS}] \quad (7)$$

Since it is a racemic molecule, the following relationships should also be satisfied:

$$[\text{R}]_0 = [\text{S}]_0 \quad (8)$$

$$[\text{R}] = [\text{S}] \quad (9)$$

$$[\text{R}_2] = [\text{S}_2] \quad (10)$$

The following equations are obtained from eqs (1), (6), (7) and (9):

$$[\text{R}] = [\text{S}] = \frac{\sqrt{1 + 4(2K_{\text{homo}} + K_{\text{hetero}})[\text{R}]_0} - 1}{2(2K_{\text{homo}} + K_{\text{hetero}})} \quad (11)$$

$$[\text{R}_2] = [\text{S}_2] = K_{\text{homo}} \left( \frac{\sqrt{1 + 4(2K_{\text{homo}} + K_{\text{hetero}})[\text{R}]_0} - 1}{2(2K_{\text{homo}} + K_{\text{hetero}})} \right)^2 \quad (12)$$

$$[\text{RS}] = 2K_{\text{hetero}} \left( \frac{\sqrt{1 + 4(2K_{\text{homo}} + K_{\text{hetero}})[\text{R}]_0} - 1}{2(2K_{\text{homo}} + K_{\text{hetero}})} \right)^2 \quad (13)$$

$$\begin{aligned}
\delta_{obs} = & \frac{\sqrt{1 + 4(2K_{\text{homo}} + K_{\text{hetero}})[\text{R}]_0} - 1}{2(2K_{\text{homo}} + K_{\text{hetero}})} \frac{\delta_{\text{R}}}{[\text{R}]_0} \\
& + 2K_{\text{homo}} \left( \frac{\sqrt{1 + 4(2K_{\text{homo}} + K_{\text{hetero}})[\text{R}]_0} - 1}{2(2K_{\text{homo}} + K_{\text{hetero}})} \right)^2 \frac{\delta_{\text{R}_2}}{[\text{R}]_0} \\
& + K_{\text{hetero}} \left( \frac{\sqrt{1 + 4(2K_{\text{homo}} + K_{\text{hetero}})[\text{R}]_0} - 1}{2(2K_{\text{homo}} + K_{\text{hetero}})} \right)^2 \frac{\delta_{\text{RS}}}{[\text{R}]_0}
\end{aligned} \tag{14}$$

Here, the terms  $\delta_{obs}$ ,  $\delta_{\text{R}}$ ,  $\delta_{\text{R}_2}$ , and  $\delta_{\text{RS}}$  denote the observed chemical shift (resulting from the fast exchange among  $\text{R}$ ,  $\text{R}_2$ , and  $\text{RS}$ ), chemical shift of the ( $R$ )-form of the monomeric (= free) clip  $\text{R}$ , ( $R,R$ )-form homochiral dimeric (= self-associated)  $\text{R}_2$ , and heterochiral dimeric  $\text{RS}$  as a *meso*-form, respectively. The values of  $K_{\text{homo}}$ ,  $\delta_{\text{R}}$ , and  $\delta_{\text{R}_2}$  are already available from the independent experiments to determine the homochiral dimerization constants of **C\*-P2** (see Supplementary Note 1). According to eq (8), numerical fitting was carried out by using half the concentration of the racemic clip as the variable.

All  $^1\text{H}$  NMR (400 MHz) spectra were obtained in  $\text{CDCl}_3$  to monitor concentration-dependent changes in the  $\delta_{obs}$  value of the  $\text{H}_{3\text{-pyridine}}$  proton (denoted with a blank triangle in the chemical structure shown next to the spectra) resonance at  $T = 298$  K. A numerical fitting was carried out by using non-linear least-squares regression analysis<sup>10</sup> with eq (14) to obtain  $K_{\text{hetero}}$  and  $\delta_{\text{RS}}$ . The  $K_{\text{hetero}}$  value was determined as  $2.3 \times 10^2 \text{ M}^{-1}$  for **C\*-P2**.

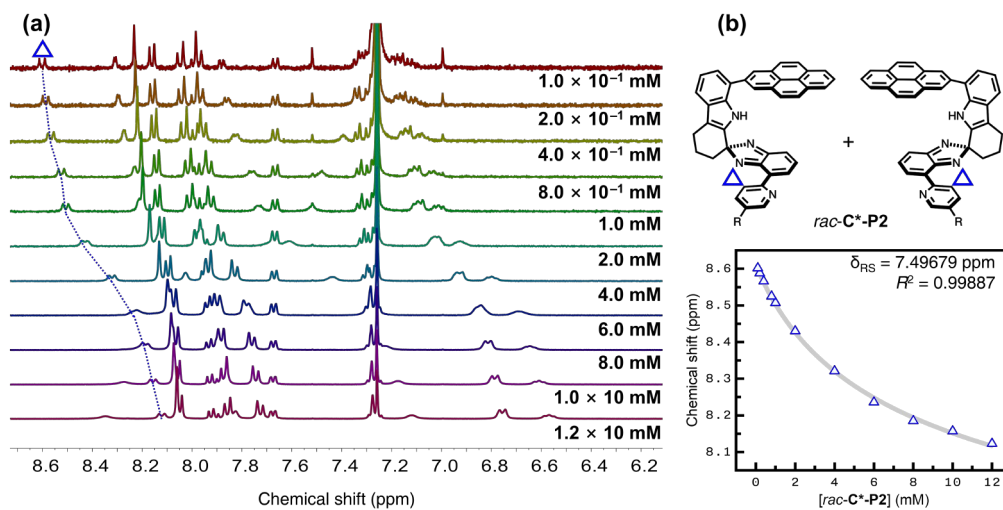

**Fig. S8** (a) Partial <sup>1</sup>H NMR spectra of *rac*-C\*-P2 at different concentrations in CDCl<sub>3</sub> measured at  $T = 298$  K. (b) Changes in the chemical shift of the H<sub>3</sub>-pyridine proton resonance (△) as a function of the sample concentration [*rac*-C\*-P2]. The theoretical curve with  $K_{\text{hetero}} = 2.3 \times 10^2 \text{ M}^{-1}$  is superimposed on the data points.

### Supplementary Note 3. Selectivity Between Self-Association and Cross-Dimerization

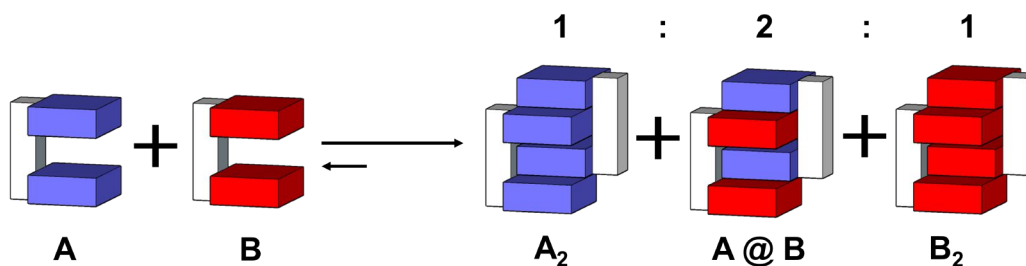

**Fig. S9** Equilibrium distribution of self-dimerization and cross-dimerization in an equimolar mixture of molecular clips A and B without thermodynamic preference.

For two arbitrary molecular clips, A and B, we assume that any forms of dimerization between molecules A and B (i.e., A with A, B with B, and A with B) occur with identical binding affinity.

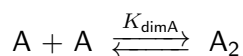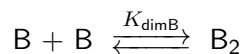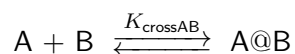

$$K_{\text{dimA}} = \frac{[A_2]}{[A]^2} \quad (15)$$

$$K_{\text{dimB}} = \frac{[B_2]}{[B]^2} \quad (16)$$

$$K_{\text{crossAB}} = \frac{[A@B]}{[A][B]} \quad (17)$$

For equal initial amounts of A and B, the fraction of A@B, as depicted in Fig. S9, is twice the fractions of either A<sub>2</sub> or B<sub>2</sub>. With the following relation,

$$[A] = [B] \quad (18)$$

$$2[A_2] = 2[B_2] = [A@B] \quad (19)$$

the following relationships are established from eqs (15), (16), (17), (18), and (19):

$$2K_{\text{dimA}} = 2K_{\text{dimB}} = K_{\text{crossAB}} \quad (20)$$

Since the enthalpy changes of the three different dimerization processes are the same, the twofold difference in the equilibrium constants result from the entropy difference of  $R\ln 2$ .

In such a case, there is no thermodynamic preference between self-dimerization and cross-dimerization, which is described by eq (21).

$$S_{\text{crossAB,dimA}} = \frac{K_{\text{crossAB}}}{2K_{\text{dimA}}} = 1 \quad (21)$$



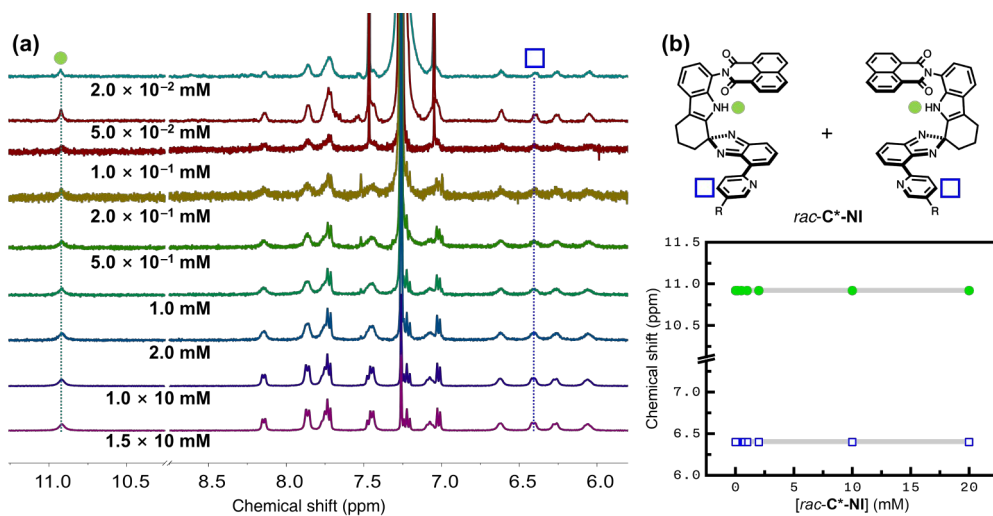

**Fig. S10** (a) Partial  $^1\text{H}$  NMR spectra of  $rac\text{-C}^*\text{-NI}$  at different concentrations in  $\text{CDCl}_3$  measured at  $T = 298\text{ K}$ . (b) Chemical shift of the  $\text{H}_{3\text{-pyridine}}$  proton resonance (□) and  $\text{N}_{\text{indole-H}}$  proton resonance (●) as a function of the sample concentration  $[rac\text{-C}^*\text{-NI}]$ .

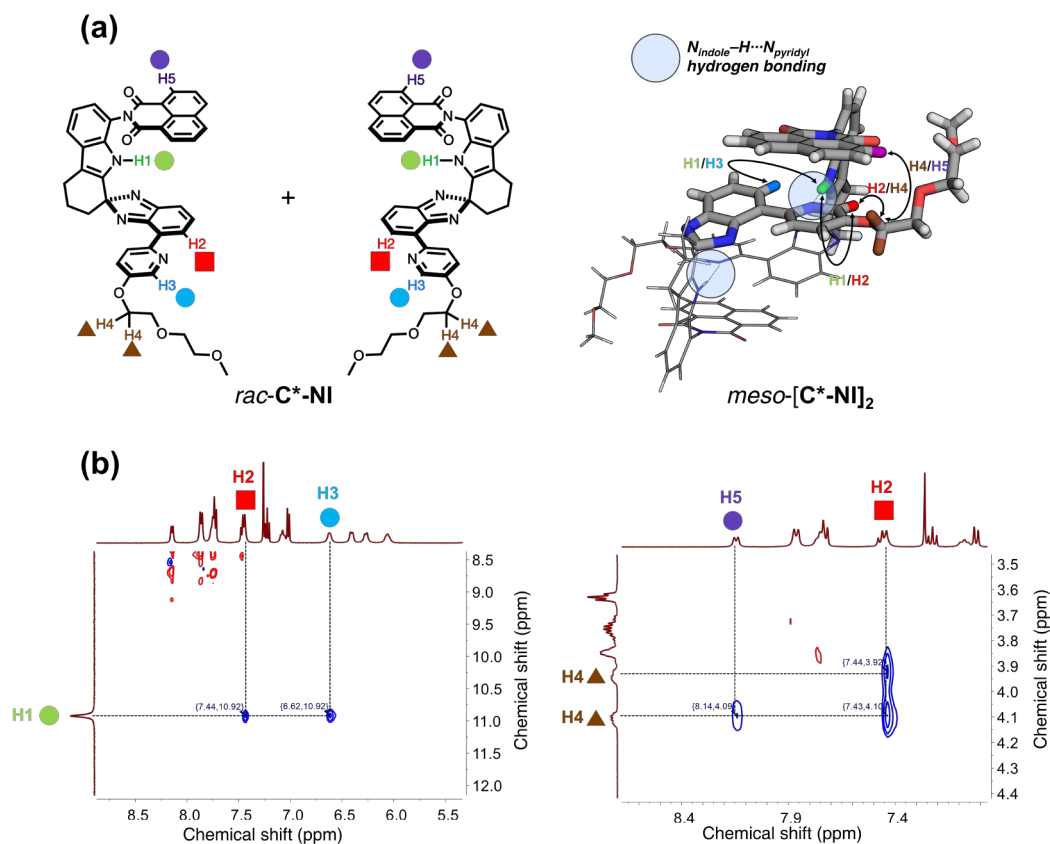

**Fig. S11** (a) Chemical structure of *rac*-C\*-NI and X-ray structure of *meso*-[C\*-NI]<sub>2</sub> with NOE contacts denoted with double-headed arrows. The proton resonances of indole (H1), isobenzimidazole (H2), indole (H2), pyridine (H3), methoxyethyl ether chain (H4), and naphthaleneimide (H5) are labeled with symbols and color-coded. Highlighted in blue shaded circles are N<sub>indole</sub>-H...N<sub>pyridyl</sub> hydrogen bonds inside the dimer cavity. (b) Partial 2D-NOESY contour plot of C\*-NI (15 mM) in CDCl<sub>3</sub> at *T* = 298 K; the corresponding 1D spectrum is shown along the ordinate. The proton labeling scheme is provided in (a).

## Supplementary Note 4. Numerical Simulations of the Enantiomeric Excess of Scalemic C\*-NI

(*R*)-C\*-NI (= R) can either (i) self-associate to form R<sub>2</sub>, or (ii) bind (*S*)-C\*-NI (= S) to afford RS.

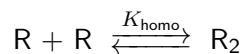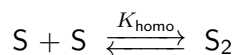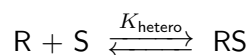

$$K_{\text{homo}} = \frac{[R_2]}{[R]^2} \quad (1)$$

$$K_{\text{homo}} = \frac{[S_2]}{[S]^2} \quad (5)$$

$$K_{\text{hetero}} = \frac{[RS]}{[R][S]} \quad (6)$$

$$[R]_0 = [R] + 2[R_2] + [RS] \quad (7)$$

$$[S]_0 = [S] + 2[S_2] + [RS] \quad (22)$$

The enantiomeric excess plot in Figure 4e was numerically simulated by using the experimentally determined homochiral dimerization constant ( $K_{\text{homo}} = 1.3 \times 10^3 \text{ M}^{-1}$ ), heterochiral dimerization constant ( $K_{\text{hetero}} = 4.68 \times 10^5 \text{ M}^{-1}$ ) and eqs (1), (5), (6), (7), and (22) using  $[(R)\text{-C}^*\text{-NI}]_0 = (1 + ee_0) \times 5 \text{ mM}$  and  $[(S)\text{-C}^*\text{-NI}]_0 = (1 - ee_0) \times 5 \text{ mM}$  with the  $ee_0$  varied from 0 to 1.

$ee_0$ ,  $ee_{\text{mono}}$ , and  $ee_{\text{total}}$  are defined as the following equations.

$$ee_0 = \frac{[R]_0 - [S]_0}{[R]_0 + [S]_0} \quad (23)$$

$$ee_{\text{mono}} = \frac{[R] - [S]}{[R] + [S]} \quad (24)$$

$$ee_{\text{total}} = \frac{([R] + 2[R_2]) - ([S] + 2[S_2])}{([R] + 2[R_2]) + ([S] + 2[S_2])} \quad (25)$$

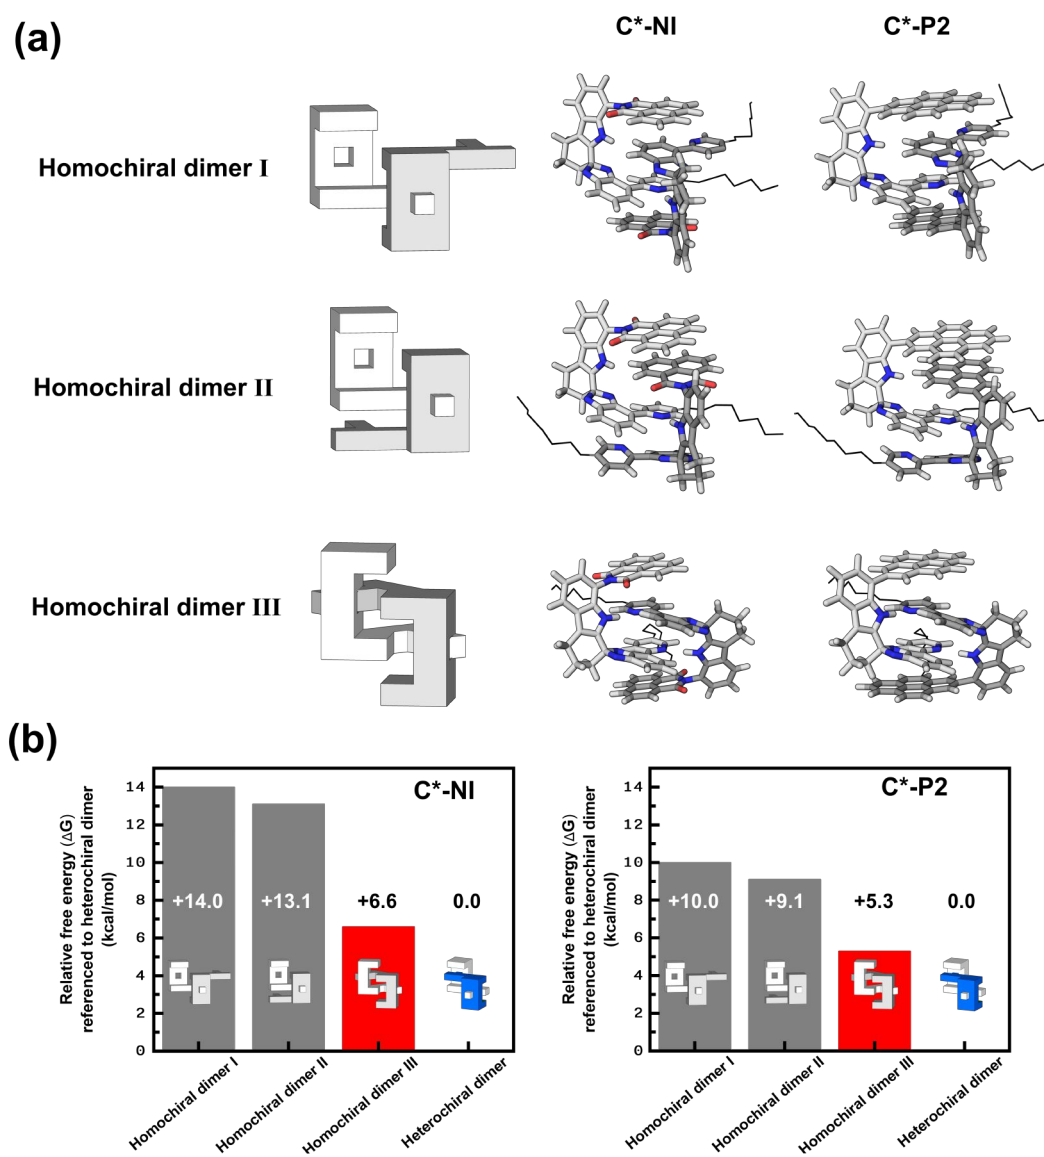

**Fig. S12** (a) Schematic representations of computed homochiral dimers,  $(R,R)$ - $[C^*]_2$ , along with the DFT energy-minimized structures calculated at the B3LYP-D3/6-31++G\*\* level. Solvation was considered by self-consistent reaction field (SCRF) calculations with conductor-like polarizable continuum model (CPCM) of  $CHCl_3$  ( $\epsilon = 4.71$ ).<sup>9</sup> (b) Bar graphs summarizing the computed free energies of homochiral dimer structures. The energies of the heterochiral dimers, calculated using the same basis set, were set as the reference points.

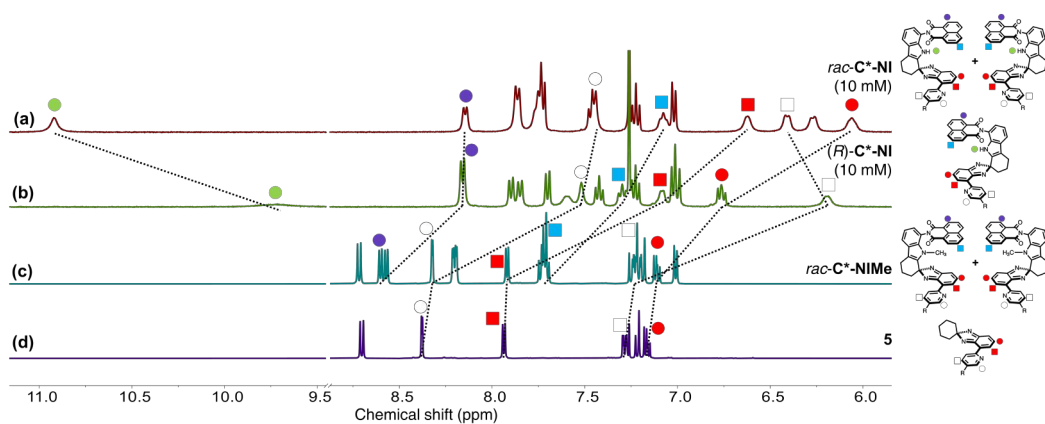

**Fig. S13** Partial <sup>1</sup>H NMR spectra of (a) *rac*-C\*-NI (10 mM), (b) (*R*)-C\*-NI (10 mM), (c) *rac*-C\*-NIMe (42 mM), and (d) **5** (23 mM) in CDCl<sub>3</sub> measured at *T* = 298 K. Proton resonances are labeled with the symbols denoted in the chemical structures.

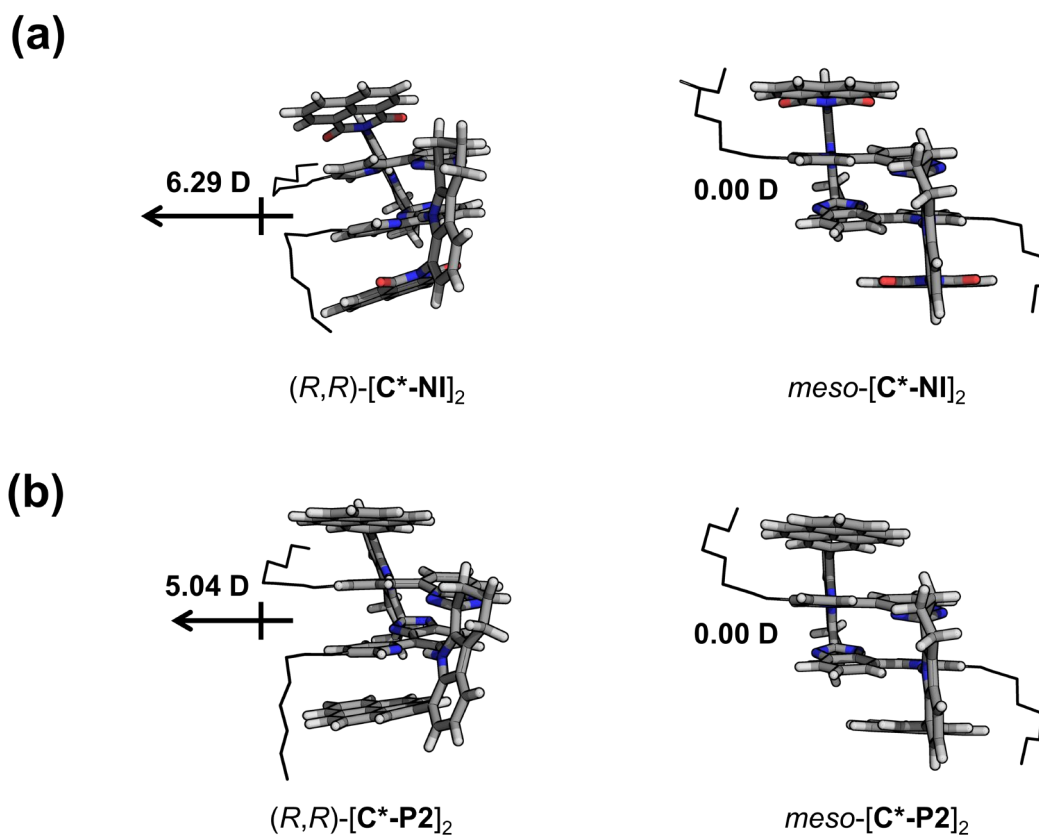

**Fig. S14** Dipole moments of DFT energy-minimized structures of the homochiral dimer (*R,R*)-[C\*]<sub>2</sub> and heterochiral dimer *meso*-[C\*]<sub>2</sub> of (a) C\***-NI** and (b) C\***-P2** calculated at the B3LYP-D3/6-31++G\*\* level. Solvation was considered by self-consistent reaction field (SCRF) calculations with conductor-like polarizable continuum model (CPCM) of CHCl<sub>3</sub> ( $\epsilon = 4.71$ ).<sup>9</sup>

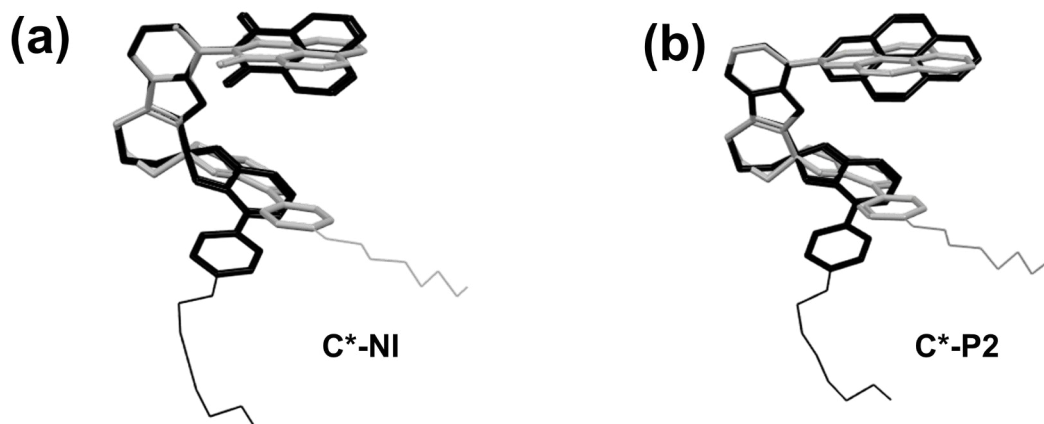

**Fig. S15** Capped-stick representations of the DFT energy-minimized structures of monomers forming the heterochiral dimer (black) overlaid with monomers forming the homochiral dimer (gray) for (a) **C\*-NI** and (b) **C\*-P2**. DFT calculations were performed at the B3LYP-D3/6-31++G\*\* level. Solvation was considered by self-consistent reaction field (SCRF) calculations with conductor-like polarizable continuum model (CPCM) of  $\text{CHCl}_3$  ( $\epsilon = 4.71$ ).<sup>9</sup>

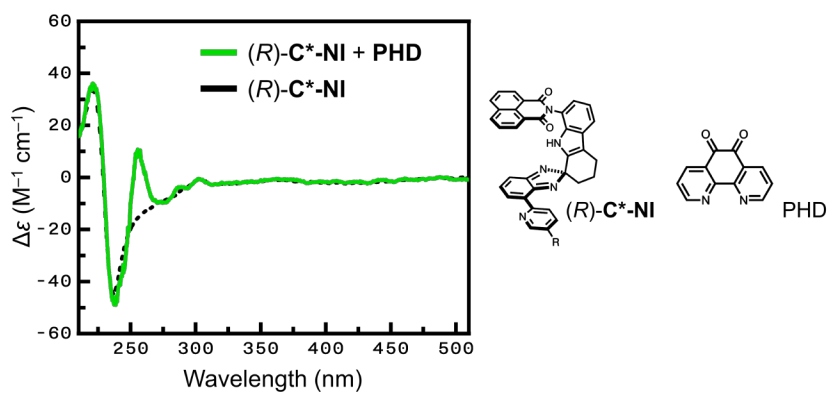

**Fig. S16** CD spectra of (*R*)-C\*-NI alone (black dashed line) and (*R*)-C\*-NI treated with 10 eq PHD (green line) measured in CH<sub>3</sub>CN at 298 K. Sample concentrations: [(*R*)-C\*-NI] = 37.8 μM; [PHD] = 378 μM.



### Supplementary Note 5. Determining the Host–Guest Complexation Constant ( $K_{\text{HG}}$ )

$^1\text{H}$  NMR titration studies were carried out in  $\text{CDCl}_3$  at  $T = 298$  K (Fig. 6b, c; S16 and S18). The initial concentration of the guest PHD was set at 0.45 mM ( $=[\text{G}]_{\text{initial}}$ ) in a 600  $\mu\text{L}$  solution. Aliquots of the enantiopure host molecule were delivered from a stock solution (18 mL). The NMR tube was sonicated to ensure homogeneous mixing. Spectra were measured after the temperature was stabilized at  $T = 298$  K.

The host ( $R$ )- $\text{C}^*$  ( $= \text{H}$ ) can either (i) self-associate to form  $\text{H}_2$ , or (ii) bind the guest ( $= \text{G}$ ) to afford HG.

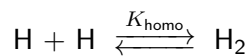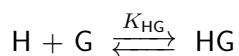

$$K_{\text{homo}} = \frac{[\text{H}_2]}{[\text{H}]^2} \quad (26)$$

$$K_{\text{HG}} = \frac{[\text{HG}]}{[\text{H}][\text{G}]} \quad (27)$$

$$[\text{H}]_0 = [\text{H}] + 2[\text{H}_2] + [\text{HG}] \quad (28)$$

From eqs (26) and (28), the following equation is obtained.

$$[\text{H}] = \frac{\sqrt{1 - 8K_{\text{homo}}([\text{HG}] - [\text{H}]_0)} - 1}{4K_{\text{homo}}} \quad (29)$$

By combining eqs (27) and (29), we obtain

$$K_{\text{HG}} = \frac{4K_{\text{homo}}[\text{HG}]}{(\sqrt{1 - 8K_{\text{homo}}([\text{HG}] - [\text{H}]_0)} - 1)[\text{G}]} \quad (30)$$

For the guest G,

$$[\text{G}]_0 = [\text{G}] + [\text{HG}] \quad (31)$$

$$[\text{G}] = \left( \frac{\delta_{\text{obs}} - \delta_{\text{HG}}}{\delta_{\text{G}} - \delta_{\text{HG}}} \right) [\text{G}]_0 \quad (32)$$

$$[\text{HG}] = \left( 1 - \frac{\delta_{\text{obs}} - \delta_{\text{HG}}}{\delta_{\text{G}} - \delta_{\text{HG}}} \right) [\text{G}]_0 \quad (33)$$

, where  $\delta_{\text{obs}}$ ,  $\delta_{\text{HG}}$ , and  $\delta_{\text{G}}$  denote the observed chemical shift, chemical shift of the host–guest complex, and chemical shift of the unbound guest, respectively.

From eqs (30), (32), and (33), the following relationship is established:

$$[\text{H}]_0 = \frac{\left\{ 1 + \left( 4K_{\text{homo}} \frac{1 - \frac{\delta_{\text{obs}} - \delta_{\text{HG}}}{\delta_{\text{G}} - \delta_{\text{HG}}}}{K_{\text{HG}} \frac{\delta_{\text{obs}} - \delta_{\text{HG}}}{\delta_{\text{G}} - \delta_{\text{HG}}}} \right)^2 \right\} + 8K_{\text{homo}} \left( 1 - \frac{\delta_{\text{obs}} - \delta_{\text{HG}}}{\delta_{\text{G}} - \delta_{\text{HG}}} \right) [\text{G}]_0 - 1}{8K_{\text{homo}}} \quad (34)$$

To take into account the volume change and sample dilution during the titration, the following correction was made.

$$[\text{G}]_0 = \left( 1 - \frac{[\text{H}]_0}{[\text{H}]_{\text{stock}}} \right) [\text{G}]_{\text{initial}} \quad (35)$$

By rearranging eqs (34) and (35) and using Solve function of Wolfram Mathematica 14,<sup>11</sup> an explicit function is obtained for  $[\text{H}]_0$ :

$$[\text{H}]_0 = - \frac{[\text{H}]_{\text{stock}} (\delta_{\text{G}} - \delta_{\text{obs}}) (2K_{\text{homo}} (\delta_{\text{G}} - \delta_{\text{obs}}) (\delta_{\text{G}} - \delta_{\text{HG}}) + K_{\text{HG}} (\delta_{\text{obs}} - \delta_{\text{HG}}) (\delta_{\text{G}} + [\text{G}]_0 K_{\text{HG}} (\delta_{\text{obs}} - \delta_{\text{HG}}) - \delta_{\text{HG}}))}{K_{\text{HG}}^2 (\delta_{\text{obs}} - \delta_{\text{HG}})^2 ([\text{G}]_0 (-\delta_{\text{G}} + \delta_{\text{obs}}) + [\text{H}]_{\text{stock}} (-\delta_{\text{G}} + \delta_{\text{HG}}))} \quad (36)$$

Using eq (36), numerical global fittings were carried out by non-linear least-squares regression analysis<sup>10</sup> to obtain  $K_{\text{HG}}$  and  $\delta_{\text{HG}}$ . The value of  $K_{\text{homo}}$  is already available from the independent experiments to determine the homochiral dimerization constants of **C\*-P2** and **C\*-NI** (see Supplementary Note 1).

All <sup>1</sup>H NMR (400 MHz) spectra were obtained in CDCl<sub>3</sub> to monitor changes in the  $\delta_{\text{obs}}$  value of the H<sub>2</sub>-PHD proton (denoted with a green filled circle in the chemical structure shown next to the spectra) resonances at  $T = 298$  K. The  $K_{\text{HG}}$  values were determined as  $1.22 \times 10^2 \text{ M}^{-1}$  for **C\*-P2** and  $4.9 \times 10^2 \text{ M}^{-1}$  for **C\*-NI**, respectively.<sup>10</sup>

The dashed lines in Fig. 6b and c, which denote the expected titration curves ( $\delta_{\text{sim}}$ ; simulated chemical shifts) in the absence of host dimerization, were numerically obtained using the experimentally determined host-guest complexation constant ( $K_{\text{HG}}$ ), the chemical shift of the unbound guest ( $\delta_{\text{G}}$ ), and the chemical shift of the host-guest complex ( $\delta_{\text{HG}}$ ). By taking the limit of eq (36) with the homochiral dimerization constant approaching zero (i.e.,  $K_{\text{homo}} \rightarrow 0$ ), the following relationship is obtained. Note that the notation  $\delta_{\text{obs}}$  in eq (36) has been replaced with  $\delta_{\text{sim}}$ .

$$\lim_{K_{\text{homo}} \rightarrow 0} [\text{H}]_0 = - \frac{[\text{H}]_{\text{stock}} (\delta_{\text{G}} - \delta_{\text{sim}}) (K_{\text{HG}} (\delta_{\text{sim}} - \delta_{\text{HG}}) (\delta_{\text{G}} + [\text{G}]_0 K_{\text{HG}} (\delta_{\text{sim}} - \delta_{\text{HG}}) - \delta_{\text{HG}}))}{K_{\text{HG}}^2 (\delta_{\text{sim}} - \delta_{\text{HG}})^2 ([\text{G}]_0 (-\delta_{\text{G}} + \delta_{\text{sim}}) + [\text{H}]_{\text{stock}} (-\delta_{\text{G}} + \delta_{\text{HG}}))} \quad (37)$$

The speciation plot Fig. 7a was numerically simulated by using the experimentally determined homochiral dimerization constant ( $K_{\text{homo}} = 1.3 \times 10^3 \text{ M}^{-1}$ ), host-guest complexation constant ( $K_{\text{HG}} = 4.9 \times 10^2 \text{ M}^{-1}$ ), and eqs (26), (27), and (28), using  $[(R)\text{-C*}\text{-NI}]_0 = 10 \text{ mM}$  and the concentration of PHD guest varied.

<sup>11</sup>Mathematica 14.0; Wolfram Research: Champaign, IL.

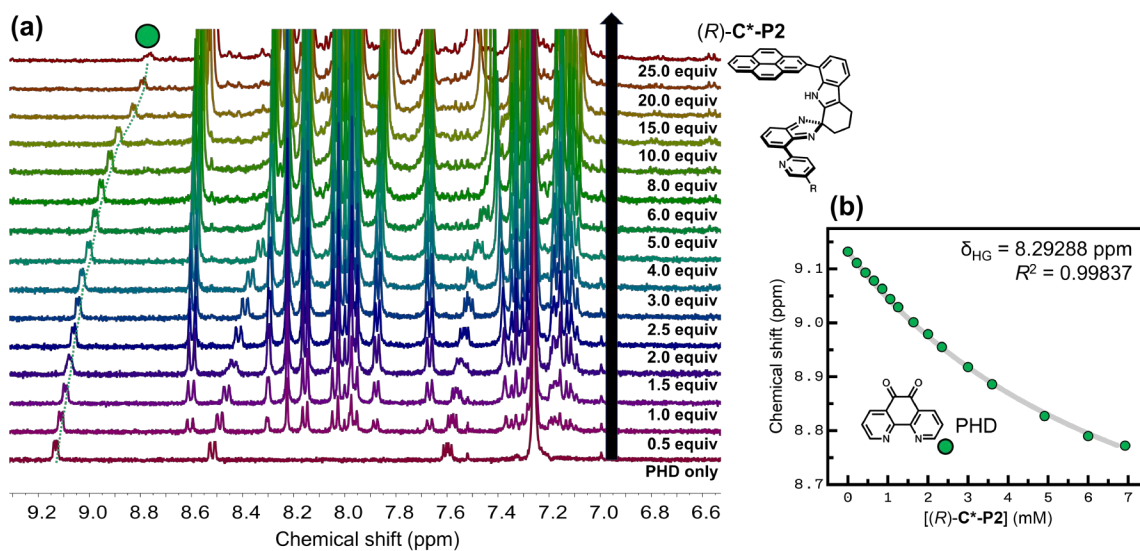

**Fig. S17** (a) Partial  $^1\text{H}$  NMR spectra of PHD in  $\text{CDCl}_3$  obtained in the presence of (*R*)- $\text{C}^*\text{-P2}$  at  $T = 298$  K. (b) Changes in the chemical shift of the proton resonance (●) as a function of the concentration [*R*]- $\text{C}^*\text{-P2}$ . The theoretical curve with  $K_{\text{HG}} = 1.22 \times 10^2 \text{ M}^{-1}$  is superimposed on the data points.

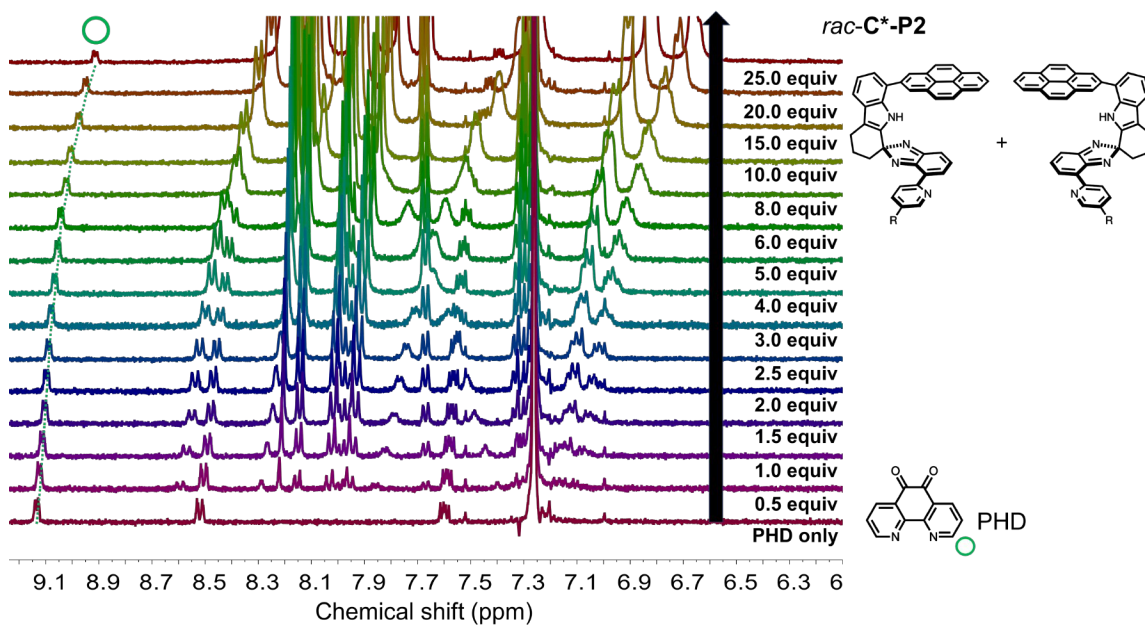

**Fig. S18** Partial  $^1\text{H}$  NMR spectra of PHD in  $\text{CDCl}_3$  obtained in the presence of an increasing amount of *rac*- $\text{C}^*\text{-P2}$  at  $T = 298$  K.

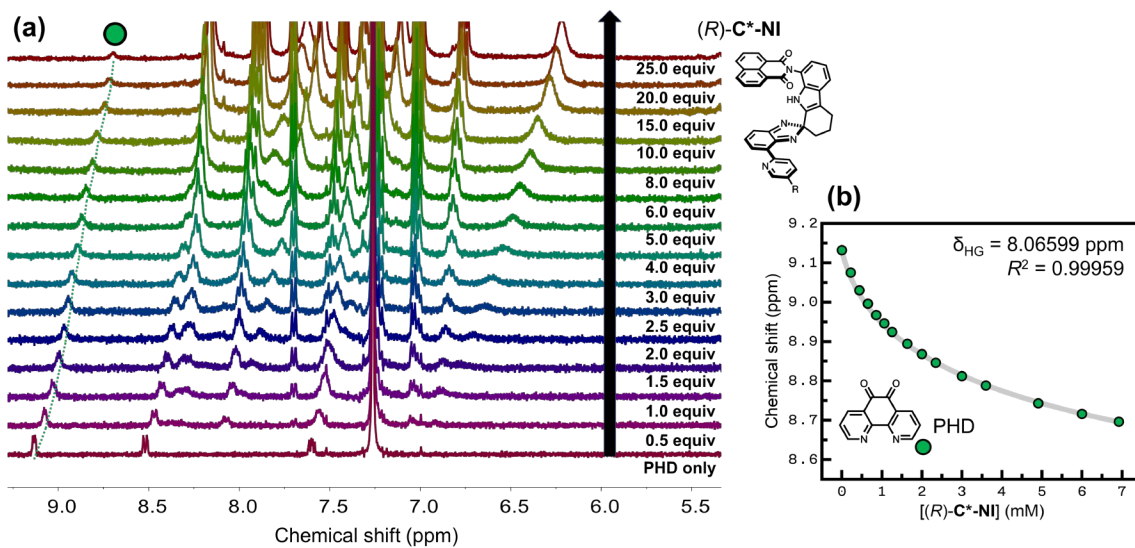

**Fig. S19** (a) Partial <sup>1</sup>H NMR spectra of PHD in CDCl<sub>3</sub> obtained in the presence of (R)-C\*-NI at  $T = 298 \text{ K}$ . (b) Changes in the chemical shift of the proton resonance (●) as a function of the concentration [(R)-C\*-NI]. The theoretical curve with  $K_{\text{HG}} = 4.9 \times 10^2 \text{ M}^{-1}$  is superimposed on the data points.

**Supplementary Note 6. Determining the Heterochiral Dimerization Constants ( $K_{\text{hetero}}$ ) of  $C^*$ -NI**

$^1\text{H}$  NMR competitions studies were carried out in  $\text{CDCl}_3$  at  $T = 298$  K (Fig. 6c and S19). The initial concentration of the guest PHD was set at 0.45 mM ( $=[\text{G}]_{\text{initial}}$ ) in a 600  $\mu\text{L}$  solution sample. Aliquots of *rac*- $C^*$ -NI host molecule were delivered from a stock solution ( $[\text{R}]_{\text{stock}} + [\text{S}]_{\text{stock}} = 18$  mM). The NMR tube was sonicated to ensure homogeneous mixing. Spectra were measured after the temperature was stabilized at  $T = 298$  K.

(*R*)- $C^*$ -NI ( $= \text{R}$ ) can either (i) self-associate to form  $\text{R}_2$ , (ii) bind the guest ( $= \text{G}$ ) to afford  $\text{RG}$ , or (iii) associated with its mirror image clip (*S*)- $C^*$ -NI ( $= \text{S}$ ) to afford  $\text{RS}$ .

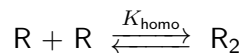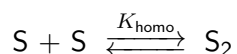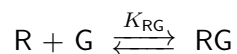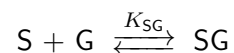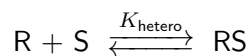

$$K_{\text{homo}} = \frac{[\text{R}_2]}{[\text{R}]^2} \quad (1)$$

$$K_{\text{homo}} = \frac{[\text{S}_2]}{[\text{S}]^2} \quad (5)$$

$$K_{\text{RG}} = \frac{[\text{RG}]}{[\text{R}][\text{G}]} \quad (38)$$

$$K_{\text{SG}} = \frac{[\text{SG}]}{[\text{S}][\text{G}]} \quad (39)$$

$$K_{\text{hetero}} = \frac{[\text{RS}]}{[\text{R}][\text{S}]} \quad (6)$$

$$[\text{R}]_0 = [\text{R}] + 2[\text{R}_2] + [\text{RG}] + [\text{RS}] \quad (40)$$

Since it is a racemic molecule, the following relationships should also be satisfied:

$$[\text{R}]_0 = [\text{S}]_0 \quad (8)$$

$$[\text{R}] = [\text{S}] \quad (9)$$

$$[R_2] = [S_2] \quad (28)$$

$$[RG] = [SG] \quad (41)$$

From eqs (1), (6), (9), and (39), the following equation is obtained.

$$[R] = [S] = \frac{\sqrt{1 - 4(2K_{\text{homo}} + K_{\text{hetero}})([RG] - [R]_0)} - 1}{2(2K_{\text{homo}} + K_{\text{hetero}})} \quad (42)$$

By combining eqs (9), (37), (38), (41), and (42), we obtain

$$K_{RG} = K_{SG} = \frac{2(2K_{\text{homo}} + K_{\text{hetero}})[RG]}{(\sqrt{1 - 4(2K_{\text{homo}} + K_{\text{hetero}})([RG] - [R]_0)} - 1)[G]} \quad (43)$$

For the guest G,

$$[G]_0 = [G] + [RG] + [SG] = [G] + 2[RG] \quad (44)$$

$$\delta_{\text{obs}} = [G] \frac{\delta_G}{[G]_0} + [RG] \frac{\delta_{RG}}{[G]_0} + [SG] \frac{\delta_{SG}}{[G]_0} = [G] \frac{\delta_G}{[G]_0} + 2[RG] \frac{\delta_{RG}}{[G]_0} \quad (45)$$

, where  $\delta_{\text{obs}}$ ,  $\delta_{RG}$  ( $= \delta_{SG}$ ), and  $\delta_G$  denote the observed chemical shift, chemical shift of (*R*)-**C\***-**NI**DPHD ( $=$  chemical shift of (*S*)-**C\***-**NI**DPHD), and chemical shift of the unbound guest, respectively.

By combining eqs (44) and (45), we obtain

$$[G] = \left( \frac{\delta_{\text{obs}} - \delta_{RG}}{\delta_G - \delta_{RG}} \right) [G]_0 \quad (46)$$

$$[RG] = [SG] = \left( \frac{1 - \frac{\delta_{\text{obs}} - \delta_{RG}}{\delta_G - \delta_{RG}}}{2} \right) [G]_0 \quad (47)$$

From eqs (43), (46), and (47), the following relationship is established:

$$[R]_0 = [S]_0 = \frac{\left\{ 1 + \left( (2K_{\text{homo}} + K_{\text{hetero}}) \frac{1 - \frac{\delta_{\text{obs}} - \delta_{RG}}{\delta_G - \delta_{RG}}}{K_{RG} \frac{\delta_{\text{obs}} - \delta_{RG}}{\delta_G - \delta_{RG}}} \right) \right\}^2 + 2(2K_{\text{homo}} + K_{\text{hetero}}) \left( 1 - \frac{\delta_{\text{obs}} - \delta_{RG}}{\delta_G - \delta_{RG}} \right) [G]_0 - 1}{4(2K_{\text{homo}} + K_{\text{hetero}})} \quad (48)$$

To take into account volume changes and sample dilution during the titration, the following correction was made.

$$[\text{G}]_0 = \left(1 - \frac{[\text{R}]_0}{[\text{R}]_{\text{stock}}}\right) [\text{G}]_{\text{initial}} \quad (49)$$

By rearranging eqs (48) and (49) and using the Solve function of Wolfram Mathematica 14,<sup>11</sup> an explicit function is obtained for  $[\text{R}]_0$  ( $= [\text{S}]_0$ ):

$$[\text{R}]_0 = [\text{S}]_0 = -\frac{1}{2} \cdot \frac{[\text{R}]_{\text{stock}}(\delta_{\text{G}} - \delta_{\text{obs}})(K_{\text{hetero}}(\delta_{\text{G}} - \delta_{\text{obs}})(\delta_{\text{G}} - \delta_{\text{RG}}) + 2K_{\text{homo}}(\delta_{\text{G}} - \delta_{\text{obs}})(\delta_{\text{G}} - \delta_{\text{RG}}) + 2K_{\text{RG}}(\delta_{\text{obs}} - \delta_{\text{RG}})(\delta_{\text{G}} + [\text{G}]_0 K_{\text{RG}}(\delta_{\text{obs}} - \delta_{\text{RG}}) - \delta_{\text{RG}}))}{K_{\text{RG}}^2(\delta_{\text{obs}} - \delta_{\text{RG}})^2([\text{G}]_0(-\delta_{\text{G}} + \delta_{\text{obs}}) + 2[\text{R}]_{\text{stock}}(-\delta_{\text{G}} + \delta_{\text{RG}}))} \quad (50)$$

Using eq (50), numerical global fittings were carried out by non-linear least-squares regression analysis<sup>10</sup> to obtain  $K_{\text{hetero}}$ . The values of  $K_{\text{homo}}$ ,  $K_{\text{RG}}$  ( $= K_{\text{HG}}$ ), and  $\delta_{\text{RG}}$  ( $= \delta_{\text{HG}}$ ) are already available from the independent experiments to determine the homochiral dimerization constant and host-guest complexation constant of **C\*-NI** (see Supplementary Notes 1 and 5). According to eq (8), numerical fitting was carried out by using half the concentration of the racemic clip as the variable.

All <sup>1</sup>H NMR (400 MHz) spectra were obtained in CDCl<sub>3</sub> to monitor changes in the  $\delta_{\text{obs}}$  value of the H<sub>2</sub>-PHD proton (denoted with a green hollow circle in the chemical structure shown next to the spectra) resonance at  $T = 298$  K. The  $K_{\text{hetero}}$  value was determined as  $4.68 \times 10^5 \text{ M}^{-1}$  for **C\*-NI**.

The speciation plot Fig. 7b was numerically simulated by using the experimentally determined homochiral dimerization constant ( $K_{\text{homo}} = 1.3 \times 10^3 \text{ M}^{-1}$ ), host-guest complexation constant ( $K_{\text{HG}} = 4.9 \times 10^2 \text{ M}^{-1}$ ), heterochiral dimerization constant ( $K_{\text{hetero}} = 4.68 \times 10^5 \text{ M}^{-1}$ ), and eqs (1), (5), (37), (38), (6), (39), (8), (9), (28), and (41), using  $[\text{rac-C*-NI}]_0 = 10 \text{ mM}$  and the concentration of PHD guest varied.

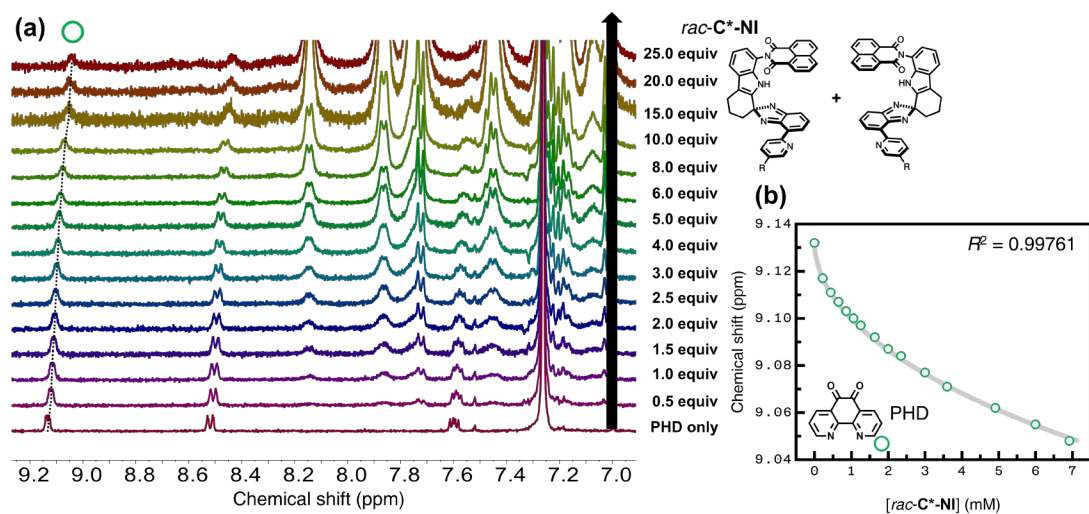

**Fig. S20** (a) Partial  $^1\text{H}$  NMR spectra of PHD in  $\text{CDCl}_3$  obtained in the presence of *rac-C*<sup>\*</sup>-NI at  $T = 298$  K. (b) Changes in the chemical shift of the proton resonance ( $\bigcirc$ ) as a function of the host concentration [*rac-C*<sup>\*</sup>-NI]. The theoretical curve with  $K_{\text{hetero}} = 4.68 \times 10^5 \text{ M}^{-1}$  is superimposed on the data points.



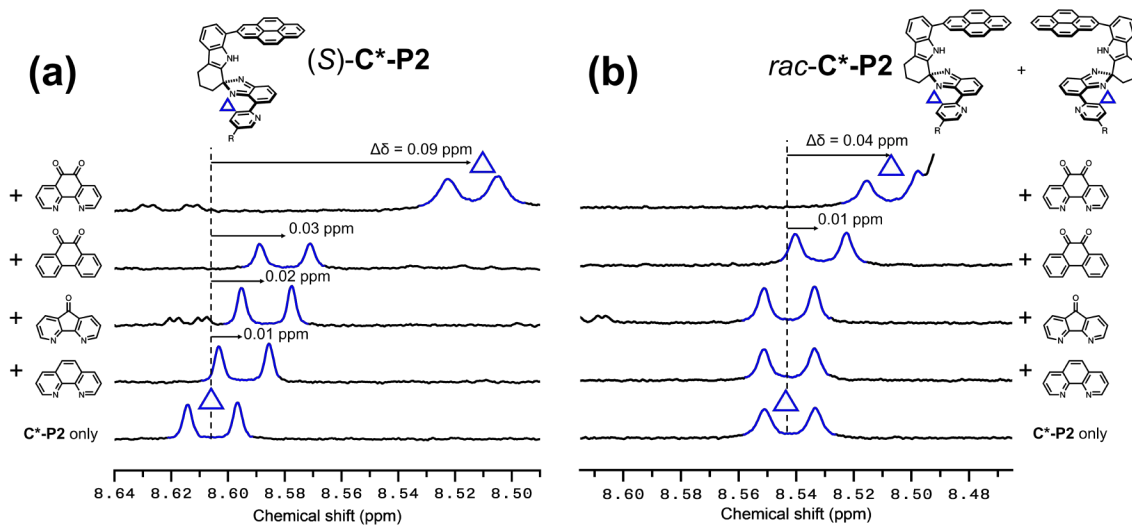

**Fig. S21** Aromatic region in the  $^1\text{H}$  NMR spectra of (a)  $(S)\text{-C}^*\text{-P2}$  and (b)  $rac\text{-C}^*\text{-P2}$  obtained in the presence of various poly(hetero)aromatic guests (G) in  $\text{CDCl}_3$  at  $T = 298$  K ( $[\text{C}^*\text{-P2}] = 1.0$  mM;  $[\text{G}] = 20.0$  mM). The pyridyl proton (denoted with blue triangle in the chemical structure of  $\text{C}^*\text{-P2}$ ) resonances are colored in blue.

**Supplementary Note 7. Numerical Simulations of the Enantiomeric Excess of Scalemic C\*-NI⊃PHD Host–Guest Complex**

(*R*)-C\*-NI (= R) can either (i) self-associate to form R<sub>2</sub>, or (ii) bind (*S*)-C\*-NI (= S) to afford RS.

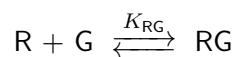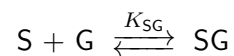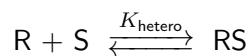

$$K_{\text{homo}} = \frac{[R_2]}{[R]^2} \quad (1)$$

$$K_{\text{homo}} = \frac{[S_2]}{[S]^2} \quad (5)$$

$$K_{\text{RG}} = \frac{[RG]}{[R][G]} \quad (37)$$

$$K_{\text{SG}} = \frac{[SG]}{[S][G]} \quad (38)$$

$$K_{\text{hetero}} = \frac{[RS]}{[R][S]} \quad (6)$$

$$[R]_0 = [R] + 2[R_2] + [RG] + [RS] \quad (39)$$

$$[S]_0 = [S] + 2[S_2] + [SG] + [RS] \quad (51)$$

$$[G]_0 = [G] + [RG] + [SG] \quad (52)$$

The enantiomeric excess plot in Fig. 7c and d were numerically simulated by using the experimentally determined homochiral dimerization constant ( $K_{\text{homo}} = 1.3 \times 10^3 \text{ M}^{-1}$ ), heterochiral dimerization constant ( $K_{\text{hetero}} = 4.68 \times 10^5 \text{ M}^{-1}$ ),  $K_{\text{HG}} = 4.9 \times 10^2 \text{ M}^{-1}$  and eqs (1), (5), (37), (38), (6), (39), (51), and (52). For Fig. 7c, the initial conditions were  $[(R)\text{-C}^*\text{-NI}]_0 = (1 + ee_0) \times 5 \text{ mM}$ ,  $[(S)\text{-C}^*\text{-NI}]_0 = (1 - ee_0) \times 5 \text{ mM}$ , and  $[\text{PHD}]_0 = 2 \text{ mM}$  with the  $ee_0$  varied from 0 to 1.

For Fig. 7d, the initial conditions were  $[(R)\text{-C}^*\text{-NI}]_0 = 6$  mM and  $[(S)\text{-C}^*\text{-NI}]_0 = 4$  mM with the  $[\text{PHD}]_0$  varied from 0 to 10 mM.

$ee_0$  and  $ee_{\text{HG}}$  are defined as following equations.

$$ee_0 = \frac{[R]_0 - [S]_0}{[R]_0 + [S]_0} \quad (23)$$

$$ee_{\text{HG}} = \frac{[\text{RG}] - [\text{SG}]}{[\text{RG}] + [\text{SG}]} \quad (53)$$

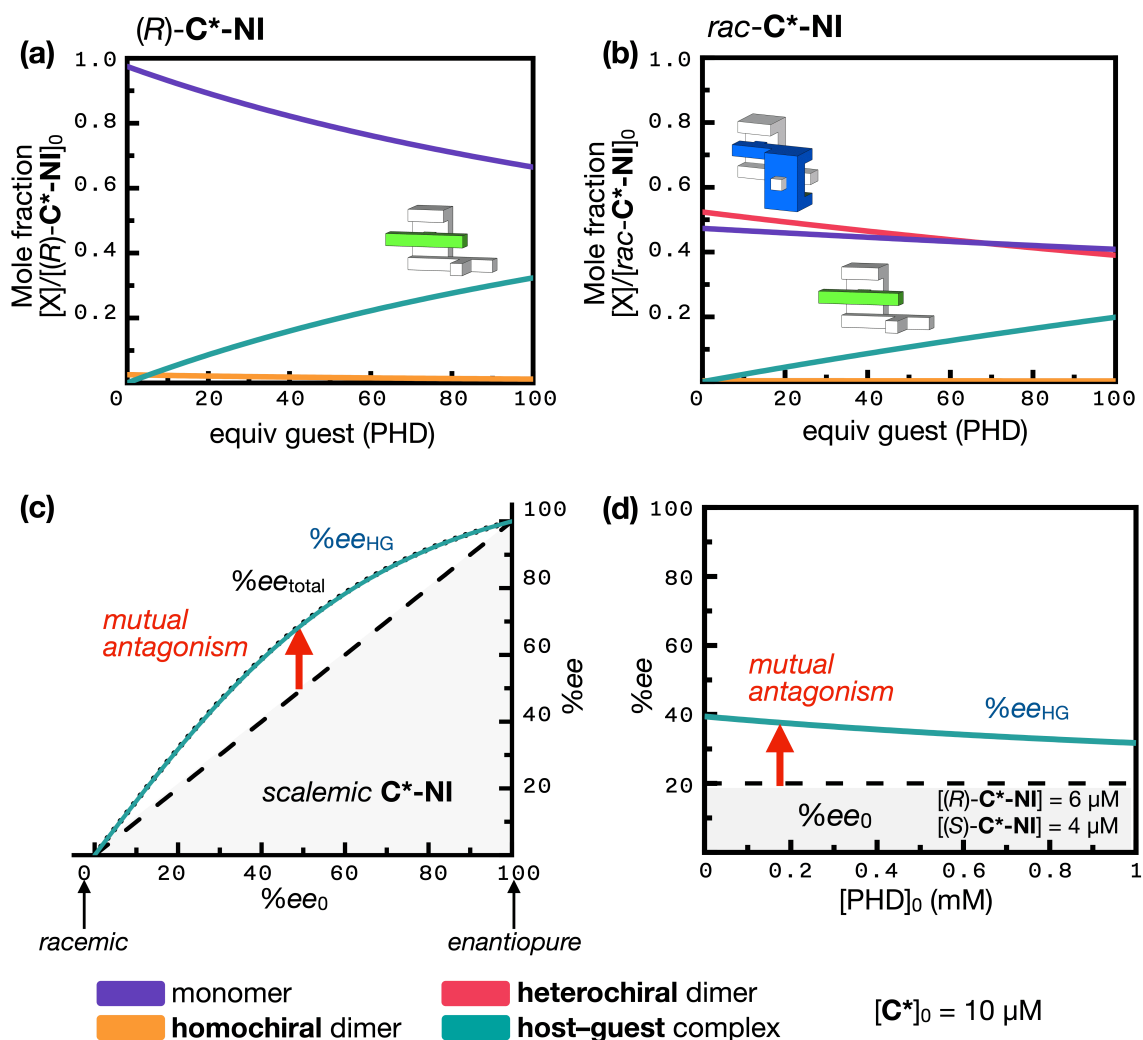

**Fig. S22.** Simulated speciation plots showing changes in the fractions of individual species originating from (a)  $(R)\text{-C}^*\text{-NI}$ , and (b)  $rac\text{-C}^*\text{-NI}$  clip (unbound  $(R)\text{-C}^*\text{-NI}$  and  $(S)\text{-C}^*\text{-NI}$ , violet line; homochiral dimeric  $(R,R)\text{-[C}^*\text{-NI]}_2$  and  $(S,S)\text{-[C}^*\text{-NI]}_2$ , orange line; host-guest complex  $(R)\text{-C}^*\text{-NI}\supset\text{PHD}$  and  $(S)\text{-C}^*\text{-NI}\supset\text{PHD}$ , cyan line; heterochiral dimeric  $meso\text{-[C}^*\text{-NI]}_2$ , magenta line) with the supply of the guest PHD into  $[\text{C}^*\text{-NI}]_0 = 10 \mu\text{M}$ . (c) Plot of the enantiomeric excess of the host-guest complex ( $ee_{HG}$ )  $\text{C}^*\text{-NI}\supset\text{PHD}$  (cyan line) as a function of the initial enantiomeric excess ( $ee_0$ ) of  $\text{C}^*\text{-NI}$  in a mixture of  $[\text{PHD}]_0$  (1 mM) and  $[\text{C}^*\text{-NI}]_0$  (10  $\mu\text{M}$ ). The black dotted lines represent the relationship between  $ee_0$  and  $ee_{total}$  (enantiomeric excess of both the monomer and homochiral dimer) in the absence of PHD; the black dashed lines indicate the relationship between  $ee_0$  and  $ee_{HG}$  in the absence of host dimerization. (d) Simulated plot illustrating the  $ee_{HG}$  (cyan line) of a mixture of  $[(R)\text{-C}^*\text{-NI}]$  and  $[(S)\text{-C}^*\text{-NI}]$  as a function of the guest (PHD) concentration. Dashed lines denote the expected relationship in the absence of host dimerization. See Fig. 3 and 6 for the  $K_{\text{homo}}$ ,  $K_{\text{hetero}}$ , and  $K_{\text{HG}}$  values used and Supplementary Notes 5, 6, and 7 for details on the numerical simulation.

**Computational Details.** All density functional theory (DFT) and time-dependent DFT (TD-DFT) calculations were performed using the Gaussian 16 suite of programs.<sup>12</sup> Ground-state geometry optimizations and vibrational frequency calculations were carried out with the B3LYP hybrid functional, incorporating Grimme’s D3 dispersion correction<sup>13</sup> (B3LYP-D3), and employing the 6-31++G\*\* basis set.<sup>14,15</sup> Vibrational frequency calculations were conducted to ensure that all optimized geometries correspond to minima on the potential energy surface. Zero-point and thermal corrections were applied to the electronic energies to derive the Gibbs free energies of the optimized geometries. The electronic energy of each monomer within the dimer was determined by performing single-point energy calculations on the monomers, utilizing the optimized structures of the dimers. TD-DFT calculations were executed with the BHandHLYP hybrid functional<sup>16</sup> and the Def2TZVP basis set,<sup>17</sup> based on the optimized structures obtained at the B3LYP-D3/6-31++G\*\* level. Solvation effects were considered through self-consistent reaction field (SCRF) calculations, using the conductor-like polarizable continuum model (CPCM) with solvent parameters for CHCl<sub>3</sub> ( $\epsilon = 4.71$ ) or CH<sub>3</sub>CN ( $\epsilon = 35.7$ ).<sup>9</sup> Unless otherwise specified, all calculations were performed using the CPCM model with CHCl<sub>3</sub> as the solvent.

---

<sup>12</sup>M. J. Frisch, G. W. Trucks, H. B. Schlegel, G. E. Scuseria, M. A. Robb, J. R. Cheeseman, G. Scalmani, V. Barone, G. A. Petersson, H. Nakatsuji, X. Li, M. Caricato, A. V. Marenich, J. Bloino, B. G. Janesko, R. Gomperts, B. Mennucci, H. P. Hratchian, J. V. Ortiz, A. F. Izmaylov, J. L. Sonnenberg, D. Williams-Young, F. Ding, F. Lipparini, F. Egidi, J. Goings, B. Peng, A. Petrone, T. Henderson, D. Ranasinghe, V. G. Zakrzewski, J. Gao, N. Rega, G. Zheng, W. Liang, M. Hada, M. Ehara, K. Toyota, R. Fukuda, J. Hasegawa, M. Ishida, T. Nakaajima, Y. Honda, O. Kitao, H. Nakai, T. Vreven, K. Throssell, J. A. Montgomery, Jr., J. E. Peralta, F. Ogliaro, M. J. Bearpark, J. J. Heyd, E. N. Brothers, K. N. Kudin, V. N. Staroverov, T. A. Keith, R. Kobayashi, J. Normand, K. Raghavachari, A. P. Rendell, J. C. Burant, S. S. Iyengar, J. Tomasi, M. Cossi, J. M. Millam, M. Klene, C. Adamo, R. Cammi, J. W. Ochterski, R. L. Martin, K. Morokuma, O. Farkas, J. B. Foresman, and D. J. Fox, Gaussian 16, Revision C.01, 2016, Gaussian Inc. Wallingford CT.

<sup>13</sup>S. Grimme, J. Antony, H. Ehrlich, and H. Krieg, *J. Chem. Phys.*, 2010, **132**, 154104.

<sup>14</sup>R. M. Dickson and A. D. Becke, *J. Chem. Phys.*, 1993, **99**, 3898–3905.

<sup>15</sup>C. Lee, W. Yang, and R. G. Parr, *Phys. Rev. B*, 1988, **37**, 785–798.

<sup>16</sup>A. D. Becke, *J. Chem. Phys.*, 1993, **98**, 5648–5652.

<sup>17</sup>F. Weigend and R. Ahlrichs, *Phys. Chem. Chem. Phys.*, 2005, **7**, 3297–3305.

**Table S2.** Cartesian coordinates of computed DFT model of (*R*)-**C\*-NI**, CPCM model with CHCl<sub>3</sub>,  $E(\text{B3LYP}) = -2194.24583798$  Hartree.

|   |           |           |           |   |           |           |           |
|---|-----------|-----------|-----------|---|-----------|-----------|-----------|
| C | 0.573675  | -2.391867 | 0.576992  | H | 1.134598  | 1.559335  | -2.083739 |
| C | 2.815640  | -1.791120 | 0.566900  | C | 1.223905  | 1.985210  | -1.090841 |
| C | 1.561412  | -1.565415 | -1.468692 | C | 0.076889  | 2.396932  | -0.430089 |
| C | 0.457305  | -2.061350 | -0.788885 | C | 2.594632  | 2.645400  | 0.793266  |
| N | 1.751496  | -2.261786 | 1.219536  | C | 0.161398  | 2.944503  | 0.876384  |
| C | 2.769946  | -1.408547 | -0.784769 | C | 2.486818  | 2.109917  | -0.475572 |
| C | -0.580216 | -2.828957 | 1.402137  | C | 1.440114  | 3.076895  | 1.501214  |
| C | -2.839904 | -3.332402 | 3.253314  | C | -1.005047 | 3.355648  | 1.573193  |
| C | -1.957222 | -2.845897 | 0.911982  | H | 3.369653  | 1.772428  | -1.006462 |
| C | -0.434344 | -3.128620 | 2.733461  | H | 2.477126  | 3.733994  | 3.284899  |
| C | -1.535490 | -3.404921 | 3.635726  | H | 3.567405  | 2.739794  | 1.267697  |
| C | -3.092572 | -3.022459 | 1.869570  | C | -0.902015 | 3.891475  | 2.848087  |
| N | -4.227956 | -2.871368 | 1.262315  | H | -1.806066 | 4.196021  | 3.364036  |
| N | -2.420341 | -2.664768 | -0.286502 | C | 0.359068  | 4.032305  | 3.465041  |
| C | -3.879378 | -2.598508 | -0.144476 | H | 0.421618  | 4.454380  | 4.462642  |
| C | -4.294403 | -1.201423 | -0.539726 | C | 1.506733  | 3.630834  | 2.807601  |
| C | -4.625639 | -3.585829 | -1.078089 | C | -1.238868 | 2.238297  | -1.085078 |
| C | -6.123976 | -3.246111 | -1.157681 | C | -2.340963 | 3.186123  | 0.957459  |
| C | -6.386756 | -1.858524 | -1.783644 | O | -1.373627 | 1.764889  | -2.208533 |
| C | -5.403938 | -0.849670 | -1.263760 | O | -3.384557 | 3.485448  | 1.527234  |
| C | -5.320915 | 0.579114  | -1.464660 | H | -3.664170 | -3.492105 | 3.939675  |
| C | -4.117773 | 1.006217  | -0.834110 | O | 3.813686  | -0.879254 | -1.479978 |
| N | -3.528722 | -0.085837 | -0.248139 | C | 5.062279  | -0.676139 | -0.805866 |
| C | -3.662432 | 2.322854  | -0.913381 | H | 4.931417  | -0.003431 | 0.051079  |
| C | -6.103290 | 1.537933  | -2.132795 | H | 5.455986  | -1.634783 | -0.448586 |
| C | -5.662713 | 2.861006  | -2.178371 | C | 5.996481  | -0.034786 | -1.831206 |
| C | -4.442576 | 3.253068  | -1.585993 | H | 6.136759  | -0.711363 | -2.686185 |
| H | 3.729940  | -1.706299 | 1.145346  | H | 5.545501  | 0.891598  | -2.199019 |
| H | 1.498474  | -1.284822 | -2.515094 | O | 7.242463  | 0.323657  | -1.250836 |
| H | -0.491809 | -2.176219 | -1.294664 | C | 8.160581  | -0.756436 | -1.083343 |
| H | 0.566114  | -3.117804 | 3.151032  | H | 8.302026  | -1.290843 | -2.033984 |
| H | -1.286596 | -3.640166 | 4.666224  | H | 7.804953  | -1.475380 | -0.332807 |
| H | -4.161409 | -3.514824 | -2.067451 | H | -2.594947 | -0.115599 | 0.131249  |
| H | -4.471432 | -4.601808 | -0.702327 | C | 9.478957  | -0.154070 | -0.623403 |
| H | -6.634407 | -4.017295 | -1.744228 | H | 9.856176  | 0.547505  | -1.383477 |
| H | -6.544690 | -3.277438 | -0.146613 | H | 9.327751  | 0.405828  | 0.312741  |
| H | -6.297412 | -1.919988 | -2.878173 | O | 10.390333 | -1.225464 | -0.428141 |
| H | -7.418191 | -1.546624 | -1.578699 | C | 11.672270 | -0.787779 | 0.006834  |
| H | -7.032206 | 1.251580  | -2.617175 | H | 12.137329 | -0.119898 | -0.733066 |
| H | -6.258402 | 3.607779  | -2.694110 | H | 11.607013 | -0.259684 | 0.969539  |
| H | -4.100040 | 4.280155  | -1.658049 | H | 12.292693 | -1.678376 | 0.126874  |
| N | -2.373501 | 2.634150  | -0.340847 |   |           |           |           |

**Table S3.** Cartesian coordinates of computed DFT model of (*R*)-**C\*-NI**, CPCM model with CH<sub>3</sub>CN,  $E(\text{B3LYP}) = -2194.25265566$  Hartree.

|   |           |           |           |   |           |           |           |
|---|-----------|-----------|-----------|---|-----------|-----------|-----------|
| C | 0.578046  | -2.374888 | 0.558958  | H | 1.130647  | 1.658339  | -2.113344 |
| C | 2.822975  | -1.781469 | 0.551463  | C | 1.216931  | 2.037518  | -1.101399 |
| C | 1.564272  | -1.523779 | -1.477807 | C | 0.068091  | 2.415714  | -0.422498 |
| C | 0.460136  | -2.024817 | -0.801698 | C | 2.584995  | 2.609082  | 0.812799  |
| N | 1.758415  | -2.257591 | 1.200031  | C | 0.150967  | 2.901219  | 0.908488  |
| C | 2.775502  | -1.380712 | -0.795276 | C | 2.479018  | 2.134684  | -0.480505 |
| C | -0.575788 | -2.818275 | 1.381060  | C | 1.429274  | 3.004988  | 1.539261  |
| C | -2.836233 | -3.332768 | 3.229754  | C | -1.015704 | 3.277952  | 1.624494  |
| C | -1.952735 | -2.836818 | 0.890185  | H | 3.363048  | 1.824125  | -1.025423 |
| C | -0.430874 | -3.122996 | 2.711445  | H | 2.466208  | 3.576454  | 3.352104  |
| C | -1.531784 | -3.404928 | 3.612185  | H | 3.557095  | 2.681209  | 1.292073  |
| C | -3.088404 | -3.018332 | 1.847238  | C | -0.912406 | 3.752828  | 2.924010  |
| N | -4.223942 | -2.866848 | 1.239521  | H | -1.815402 | 4.032135  | 3.455676  |
| N | -2.416436 | -2.653895 | -0.307920 | C | 0.348098  | 3.864960  | 3.546997  |
| C | -3.875619 | -2.590287 | -0.166742 | H | 0.410588  | 4.238825  | 4.563508  |
| C | -4.291882 | -1.191797 | -0.556262 | C | 1.495920  | 3.495802  | 2.870652  |
| C | -4.619272 | -3.575204 | -1.104965 | C | -1.246189 | 2.283693  | -1.081586 |
| C | -6.117204 | -3.235596 | -1.191360 | C | -2.349134 | 3.134586  | 1.001970  |
| C | -6.376935 | -1.846418 | -1.814789 | O | -1.384560 | 1.861553  | -2.226441 |
| C | -5.399593 | -0.837956 | -1.283183 | O | -3.396728 | 3.404233  | 1.583188  |
| C | -5.319878 | 0.592650  | -1.472746 | H | -3.659699 | -3.496775 | 3.916053  |
| C | -4.120686 | 1.018410  | -0.832971 | O | 3.819001  | -0.848441 | -1.486163 |
| N | -3.529641 | -0.076499 | -0.255490 | C | 5.069443  | -0.650534 | -0.810845 |
| C | -3.668812 | 2.337373  | -0.897983 | H | 4.938370  | 0.016470  | 0.050081  |
| C | -6.101634 | 1.555532  | -2.136848 | H | 5.462151  | -1.612009 | -0.461224 |
| C | -5.664842 | 2.880597  | -2.168002 | C | 6.001867  | -0.003631 | -1.834272 |
| C | -4.448441 | 3.271660  | -1.565734 | H | 6.139935  | -0.674817 | -2.693652 |
| H | 3.739066  | -1.707181 | 1.128301  | H | 5.551914  | 0.926142  | -2.194379 |
| H | 1.499506  | -1.228291 | -2.519980 | O | 7.250885  | 0.349077  | -1.254788 |
| H | -0.490379 | -2.128969 | -1.306819 | C | 8.165964  | -0.735210 | -1.093429 |
| H | 0.568478  | -3.111842 | 3.131327  | H | 8.305530  | -1.263462 | -2.047688 |
| H | -1.282721 | -3.643820 | 4.641681  | H | 7.806567  | -1.457163 | -0.347876 |
| H | -4.152009 | -3.502678 | -2.092792 | H | -2.606082 | -0.102028 | 0.149236  |
| H | -4.466516 | -4.592025 | -0.731141 | C | 9.485560  | -0.139018 | -0.628873 |
| H | -6.623888 | -4.004971 | -1.783150 | H | 9.864022  | 0.568733  | -1.382381 |
| H | -6.544645 | -3.270363 | -0.183101 | H | 9.336714  | 0.411493  | 0.312936  |
| H | -6.278420 | -1.904611 | -2.908561 | O | 10.397497 | -1.213103 | -0.444202 |
| H | -7.410299 | -1.536242 | -1.617803 | C | 11.678979 | -0.777840 | -0.001283 |
| H | -7.026977 | 1.270908  | -2.628992 | H | 12.143443 | -0.100843 | -0.732805 |
| H | -6.260114 | 3.629933  | -2.680530 | H | 11.610008 | -0.260842 | 0.966810  |
| H | -4.107999 | 4.300158  | -1.628509 | H | 12.300917 | -1.668502 | 0.109970  |
| N | -2.381216 | 2.641992  | -0.319254 |   |           |           |           |

**Table S4.** Cartesian coordinates of computed DFT model of (*R,R*)-[C\*-NI]<sub>2</sub> I,  
*E*(B3LYP) = -4388.55796842 Hartree.

|   |           |           |           |   |           |           |           |
|---|-----------|-----------|-----------|---|-----------|-----------|-----------|
| C | -2.023165 | -1.152772 | 1.158715  | C | 1.554692  | 1.323203  | -1.447321 |
| C | -3.840828 | -2.107751 | 0.077207  | C | -0.682550 | 1.635947  | -0.889378 |
| C | -4.236389 | -0.840995 | 2.078974  | C | -0.163850 | 0.480134  | -2.923993 |
| C | -2.869202 | -0.610650 | 2.146910  | C | 1.180041  | 0.648608  | -2.624119 |
| N | -2.526358 | -1.889151 | 0.147758  | N | 0.613393  | 1.809749  | -0.612520 |
| C | -4.749352 | -1.603274 | 1.024903  | C | -1.128119 | 0.972864  | -2.040480 |
| C | -0.554547 | -0.968427 | 1.175250  | C | 2.969786  | 1.522676  | -1.063977 |
| C | 2.393486  | -0.740376 | 1.140269  | C | 5.753802  | 1.942540  | -0.143711 |
| C | 0.130618  | -0.037841 | 2.067810  | C | 4.053841  | 0.685187  | -1.572233 |
| C | 0.257475  | -1.653620 | 0.310985  | C | 3.344624  | 2.471657  | -0.149717 |
| C | 1.698843  | -1.537507 | 0.284638  | C | 4.706647  | 2.691924  | 0.293779  |
| C | 1.621158  | 0.066829  | 2.047633  | C | 5.452679  | 0.893365  | -1.084200 |
| N | 2.028752  | 0.973621  | 2.879738  | N | 6.252882  | 0.016563  | -1.605924 |
| N | -0.356038 | 0.815047  | 2.913244  | N | 4.020779  | -0.317604 | -2.395172 |
| C | 0.799259  | 1.536851  | 3.469522  | C | 5.400544  | -0.816757 | -2.474242 |
| C | 0.692962  | 2.999841  | 3.108284  | C | 5.454634  | -2.256495 | -2.026223 |
| C | 0.797628  | 1.404324  | 5.019674  | C | 5.914282  | -0.755287 | -3.941902 |
| C | 1.613760  | 2.503851  | 5.710713  | C | 7.197011  | -1.578002 | -4.132445 |
| C | 1.004853  | 3.894967  | 5.450442  | C | 6.960655  | -3.080421 | -3.877681 |
| C | 0.750664  | 4.058310  | 3.980563  | C | 6.150549  | -3.271997 | -2.629027 |
| C | 0.571266  | 5.247880  | 3.187706  | C | 5.895223  | -4.463170 | -1.854029 |
| C | 0.434998  | 4.815658  | 1.834256  | C | 5.022629  | -4.081389 | -0.795185 |
| N | 0.500760  | 3.442982  | 1.810293  | N | 4.762528  | -2.737775 | -0.925139 |
| C | 0.273774  | 5.736189  | 0.793333  | C | 4.534897  | -5.008389 | 0.129522  |
| C | 0.520280  | 6.622147  | 3.478442  | C | 6.301522  | -5.805340 | -1.948979 |
| C | 0.342294  | 7.529326  | 2.435293  | C | 5.840479  | -6.719654 | -1.002823 |
| C | 0.225340  | 7.089718  | 1.100147  | C | 4.958969  | -6.327137 | 0.025781  |
| H | -4.181701 | -2.695097 | -0.769186 | H | -1.379791 | 2.035317  | -0.160516 |
| H | -4.914952 | -0.432155 | 2.820808  | H | -0.480277 | -0.029052 | -3.828183 |
| H | -2.451500 | -0.010397 | 2.943810  | H | 1.940915  | 0.259236  | -3.285868 |
| H | -0.202636 | -2.333415 | -0.395799 | H | 2.593255  | 3.113825  | 0.284212  |
| H | 2.213767  | -2.124794 | -0.468077 | H | 4.868739  | 3.492391  | 1.008734  |
| H | -0.246287 | 1.462391  | 5.344895  | H | 5.115202  | -1.145680 | -4.580800 |
| H | 1.171896  | 0.409577  | 5.270050  | H | 6.072619  | 0.295783  | -4.201350 |
| H | 1.646317  | 2.300599  | 6.786820  | H | 7.569496  | -1.426974 | -5.151349 |
| H | 2.646057  | 2.479255  | 5.341630  | H | 7.965341  | -1.205095 | -3.445993 |
| H | 0.070753  | 4.003357  | 6.021548  | H | 6.435454  | -3.526314 | -4.735194 |
| H | 1.680031  | 4.680396  | 5.810693  | H | 7.920413  | -3.604944 | -3.798988 |
| H | 0.619123  | 6.971594  | 4.502132  | H | 6.964296  | -6.125145 | -2.747594 |
| H | 0.299556  | 8.593559  | 2.645273  | H | 6.150075  | -7.758442 | -1.060986 |
| H | 0.104405  | 7.806189  | 0.293829  | H | 4.583057  | -7.057564 | 0.734728  |
| N | 0.206421  | 5.271804  | -0.573286 | N | 3.558624  | -4.601000 | 1.113986  |
| H | -3.215216 | 4.326804  | -2.540343 | H | -0.426595 | -5.306631 | 0.753549  |
| C | -2.299124 | 4.135481  | -3.088442 | C | -0.137489 | -4.735455 | 1.628786  |
| C | -1.084390 | 4.439687  | -2.492901 | C | 1.206963  | -4.462030 | 1.837639  |
| C | -1.169183 | 3.301094  | -5.060887 | C | -0.739085 | -3.503696 | 3.622665  |
| C | 0.129449  | 4.203538  | -3.188848 | C | 1.614110  | -3.702336 | 2.962950  |
| C | -2.340826 | 3.566905  | -4.377756 | C | -1.112578 | -4.256489 | 2.526273  |
| C | 0.092725  | 3.614016  | -4.489152 | C | 0.628144  | -3.210826 | 3.872442  |
| C | 1.380091  | 4.526107  | -2.603514 | C | 2.982064  | -3.394936 | 3.180887  |



|   |            |           |           |   |           |           |           |
|---|------------|-----------|-----------|---|-----------|-----------|-----------|
| H | -3.299647  | 3.322741  | -4.822753 | H | -2.160789 | -4.461372 | 2.337201  |
| H | 1.296187   | 2.886375  | -6.134850 | H | 0.303669  | -2.060036 | 5.676349  |
| H | -1.200079  | 2.845108  | -6.046333 | H | -1.491197 | -3.115563 | 4.303358  |
| C | 2.560037   | 4.257738  | -3.280102 | C | 3.360321  | -2.635937 | 4.277746  |
| H | 3.504140   | 4.501219  | -2.805917 | H | 4.410244  | -2.404856 | 4.420197  |
| C | 2.528511   | 3.659778  | -4.556807 | C | 2.391155  | -2.161244 | 5.185775  |
| H | 3.460316   | 3.443749  | -5.069021 | H | 2.704200  | -1.564971 | 6.036444  |
| C | 1.320484   | 3.347572  | -5.151525 | C | 1.052257  | -2.438396 | 4.986209  |
| C | -1.057549  | 4.953452  | -1.104923 | C | 2.206106  | -4.923014 | 0.849657  |
| C | 1.433547   | 5.119279  | -1.252627 | C | 4.009628  | -3.851704 | 2.219930  |
| O | -2.069246  | 5.083373  | -0.422019 | O | 1.904869  | -5.538152 | -0.166867 |
| O | 2.482918   | 5.445245  | -0.706440 | O | 5.202537  | -3.587232 | 2.336313  |
| H | 3.473769   | -0.646915 | 1.138274  | H | 6.772105  | 2.099922  | 0.194310  |
| O | -6.091142  | -1.805627 | 1.001142  | O | -2.430310 | 0.777288  | -2.364741 |
| C | -6.678436  | -2.391952 | -0.170008 | C | -3.439360 | 1.163146  | -1.419981 |
| H | -6.415636  | -1.797943 | -1.051269 | H | -3.312346 | 0.607690  | -0.485387 |
| H | -6.320626  | -3.420688 | -0.294042 | H | -3.366160 | 2.236073  | -1.212245 |
| C | -8.189234  | -2.357144 | 0.051974  | C | -4.778638 | 0.796051  | -2.061286 |
| H | -8.449553  | -2.910681 | 0.965557  | H | -5.064157 | 1.547302  | -2.812785 |
| H | -8.510795  | -1.319894 | 0.175209  | H | -4.670659 | -0.171089 | -2.559639 |
| O | -8.890995  | -2.869002 | -1.073815 | O | -5.809247 | 0.626886  | -1.100343 |
| C | -8.964052  | -4.292269 | -1.139132 | C | -6.142623 | 1.802352  | -0.365097 |
| H | -9.405095  | -4.696597 | -0.216227 | H | -6.377735 | 2.633088  | -1.047097 |
| H | -7.971071  | -4.742762 | -1.272536 | H | -5.314149 | 2.112575  | 0.286435  |
| C | -9.842341  | -4.639685 | -2.330925 | C | -7.350376 | 1.455120  | 0.489773  |
| H | -10.845306 | -4.205877 | -2.196258 | H | -8.198473 | 1.176981  | -0.156010 |
| H | -9.408577  | -4.217323 | -3.250726 | H | -7.109768 | 0.592578  | 1.128214  |
| O | -9.911197  | -6.056084 | -2.410500 | O | -7.667741 | 2.596572  | 1.272728  |
| C | -10.710334 | -6.510259 | -3.496339 | C | -8.775180 | 2.377164  | 2.137916  |
| H | -11.747922 | -6.157416 | -3.402424 | H | -9.684426 | 2.135019  | 1.567910  |
| H | -10.305185 | -6.167209 | -4.459750 | H | -8.572045 | 1.558750  | 2.844394  |
| H | -10.698549 | -7.601915 | -3.470002 | H | -8.936817 | 3.301990  | 2.695727  |
| H | 0.570891   | 2.854034  | 0.970145  | H | 4.335907  | -2.163570 | -0.218179 |

**Table S5.** Cartesian coordinates of computed DFT model of (*R,R*)-[C\*-NI]<sub>2</sub> II,  $E(\text{B3LYP}) = -4388.55932614$  Hartree.

|   |           |           |           |   |           |           |           |
|---|-----------|-----------|-----------|---|-----------|-----------|-----------|
| C | -0.360063 | -4.748001 | -0.603561 | C | 0.105508  | -1.167119 | -0.788166 |
| C | -2.622023 | -4.393098 | -0.936393 | C | 2.367588  | -0.894731 | -1.252763 |
| C | -1.929678 | -5.646794 | 0.994758  | C | 0.793130  | -0.602430 | -3.035955 |
| C | -0.620711 | -5.473325 | 0.576236  | C | -0.214941 | -0.896656 | -2.131518 |
| N | -1.357645 | -4.244144 | -1.349410 | N | 1.391659  | -1.175659 | -0.383802 |
| C | -2.962786 | -5.077628 | 0.241950  | C | 2.119503  | -0.579571 | -2.594188 |
| C | 1.023917  | -4.499083 | -1.063551 | C | -0.930255 | -1.442444 | 0.229630  |
| C | 3.774611  | -4.011763 | -2.018872 | C | -2.916387 | -2.026389 | 2.343217  |
| C | 2.119558  | -4.326388 | -0.117889 | C | -2.325663 | -1.041028 | 0.067654  |
| C | 1.353662  | -4.368001 | -2.385172 | C | -0.632899 | -2.080728 | 1.404087  |
| C | 2.707116  | -4.132202 | -2.856052 | C | -1.604320 | -2.372993 | 2.439304  |
| C | 3.508131  | -4.085631 | -0.604051 | C | -3.318599 | -1.333610 | 1.146897  |
| N | 4.320628  | -3.935222 | 0.396613  | N | -4.492587 | -0.886934 | 0.820486  |
| N | 2.089610  | -4.299839 | 1.177311  | N | -2.908127 | -0.405798 | -0.903350 |
| C | 3.474014  | -4.057103 | 1.601033  | C | -4.312835 | -0.256141 | -0.501444 |
| C | 3.572694  | -2.788111 | 2.411383  | C | -4.686268 | 1.205089  | -0.434958 |
| C | 3.943744  | -5.251873 | 2.484728  | C | -5.245315 | -0.920949 | -1.555336 |
| C | 5.189780  | -4.916619 | 3.313076  | C | -6.713532 | -0.530188 | -1.338242 |
| C | 4.900424  | -3.788177 | 4.321037  | C | -6.941425 | 0.979101  | -1.552036 |
| C | 4.207118  | -2.655546 | 3.621406  | C | -5.850283 | 1.767596  | -0.889321 |
| C | 4.117466  | -1.262942 | 3.977583  | C | -5.744333 | 3.187556  | -0.644843 |
| C | 3.440833  | -0.612848 | 2.902585  | C | -4.468319 | 3.403737  | -0.050954 |
| N | 3.113355  | -1.559295 | 1.959501  | N | -3.838389 | 2.185083  | 0.062089  |
| C | 3.275915  | 0.776761  | 2.889683  | C | -4.004812 | 4.687802  | 0.253637  |
| C | 4.569274  | -0.504440 | 5.070720  | C | -6.583559 | 4.289151  | -0.880430 |
| C | 4.350134  | 0.871580  | 5.073517  | C | -6.141951 | 5.561374  | -0.518725 |
| C | 3.721620  | 1.507548  | 3.984027  | C | -4.861448 | 5.761448  | 0.034945  |
| H | -3.381621 | -3.936917 | -1.562354 | H | 3.376381  | -0.918472 | -0.854382 |
| H | -2.168716 | -6.190451 | 1.902862  | H | 0.571947  | -0.377238 | -4.074168 |
| H | 0.196690  | -5.876959 | 1.158917  | H | -1.248514 | -0.901202 | -2.447107 |
| H | 0.565850  | -4.453719 | -3.126194 | H | 0.380659  | -2.421552 | 1.573527  |
| H | 2.854365  | -4.056405 | -3.929251 | H | -1.246438 | -2.900695 | 3.317992  |
| H | 3.112616  | -5.503992 | 3.151467  | H | -4.903449 | -0.591434 | -2.541892 |
| H | 4.116359  | -6.107238 | 1.824763  | H | -5.109176 | -2.003583 | -1.503437 |
| H | 5.521193  | -5.818147 | 3.840064  | H | -7.347757 | -1.102667 | -2.022756 |
| H | 6.001541  | -4.611757 | 2.642399  | H | -7.002951 | -0.806293 | -0.318697 |
| H | 4.276955  | -4.174542 | 5.140940  | H | -6.962329 | 1.204336  | -2.628525 |
| H | 5.833159  | -3.439885 | 4.780585  | H | -7.922924 | 1.270854  | -1.159080 |
| H | 5.087354  | -0.983484 | 5.896480  | H | -7.559717 | 4.151899  | -1.336120 |
| H | 4.690559  | 1.473708  | 5.910261  | H | -6.781730 | 6.422425  | -0.684923 |
| H | 3.615526  | 2.585395  | 3.970711  | H | -4.515544 | 6.764096  | 0.261408  |
| N | 2.779049  | 1.437286  | 1.704827  | N | -2.639606 | 4.890892  | 0.681596  |
| H | -1.080928 | 1.502114  | 0.549332  | H | 0.189403  | 6.712485  | -1.600826 |
| C | -0.405104 | 1.989032  | -0.141598 | C | 0.544975  | 6.319296  | -0.654896 |
| C | 0.936938  | 2.026199  | 0.189193  | C | -0.356335 | 5.688577  | 0.189953  |
| C | 0.020897  | 3.122125  | -2.231980 | C | 2.355950  | 5.906241  | 0.898064  |
| C | 1.868321  | 2.610645  | -0.704486 | C | 0.084602  | 5.147199  | 1.423115  |
| C | -0.867777 | 2.534290  | -1.354932 | C | 1.904558  | 6.428481  | -0.299118 |
| C | 1.408056  | 3.172940  | -1.934485 | C | 1.461012  | 5.256460  | 1.788296  |
| C | 3.251823  | 2.628890  | -0.400210 | C | -0.817009 | 4.473188  | 2.286111  |

|   |            |           |           |   |           |           |           |
|---|------------|-----------|-----------|---|-----------|-----------|-----------|
| H | -1.923212  | 2.480354  | -1.592384 | H | 2.597537  | 6.913243  | -0.978295 |
| H | 2.010374   | 4.185842  | -3.748856 | H | 2.931733  | 4.776761  | 3.298572  |
| H | -0.333746  | 3.552558  | -3.163858 | H | 3.405498  | 5.977652  | 1.168421  |
| C | 4.153556   | 3.200738  | -1.285962 | C | -0.365209 | 3.923376  | 3.475898  |
| H | 5.209311   | 3.195557  | -1.037705 | H | -1.066465 | 3.394114  | 4.111019  |
| C | 3.703170   | 3.768324  | -2.495688 | C | 0.990710  | 4.038799  | 3.846095  |
| H | 4.421209   | 4.211221  | -3.178046 | H | 1.329309  | 3.593543  | 4.775264  |
| C | 2.357969   | 3.753639  | -2.814789 | C | 1.885046  | 4.691786  | 3.020680  |
| C | 1.391715   | 1.420839  | 1.459495  | C | -1.767948 | 5.546791  | -0.225890 |
| C | 3.747321   | 1.998767  | 0.843032  | C | -2.234991 | 4.317801  | 1.903601  |
| O | 0.626359   | 0.915835  | 2.272638  | O | -2.186078 | 5.956369  | -1.302259 |
| O | 4.939309   | 1.943944  | 1.127449  | O | -3.046867 | 3.697135  | 2.587062  |
| H | 4.783434   | -3.843236 | -2.379893 | H | -3.642603 | -2.252032 | 3.116245  |
| O | -4.226446  | -5.232726 | 0.722552  | O | 3.077797  | -0.248611 | -3.498094 |
| C | -5.288178  | -4.483423 | 0.116745  | C | 4.433961  | -0.129286 | -3.042148 |
| H | -5.085771  | -3.410920 | 0.208202  | H | 4.495988  | 0.581536  | -2.210960 |
| H | -5.379818  | -4.751308 | -0.942045 | H | 4.800757  | -1.106563 | -2.708769 |
| C | -6.562075  | -4.823125 | 0.891298  | C | 5.236343  | 0.401724  | -4.227141 |
| H | -6.894252  | -5.844978 | 0.654902  | H | 5.170122  | -0.296121 | -5.074158 |
| H | -6.350384  | -4.764103 | 1.962109  | H | 4.817146  | 1.362985  | -4.538063 |
| O | -7.598966  | -3.883577 | 0.641861  | O | 6.589264  | 0.644361  | -3.866624 |
| C | -8.088968  | -3.872658 | -0.696921 | C | 7.416120  | -0.518425 | -3.830207 |
| H | -8.351125  | -4.890010 | -1.023196 | H | 7.395647  | -1.033517 | -4.801837 |
| H | -7.340022  | -3.470835 | -1.392476 | H | 7.085496  | -1.225500 | -3.057567 |
| C | -9.310088  | -2.966709 | -0.719533 | C | 8.828823  | -0.051294 | -3.517435 |
| H | -10.144256 | -3.426587 | -0.168119 | H | 9.169784  | 0.654826  | -4.290486 |
| H | -9.062622  | -2.013180 | -0.230016 | H | 8.843613  | 0.470082  | -2.547765 |
| O | -9.658366  | -2.756607 | -2.080868 | O | 9.659192  | -1.202999 | -3.483818 |
| C | -10.747824 | -1.855345 | -2.237582 | C | 11.015308 | -0.897853 | -3.180791 |
| H | -11.653415 | -2.232696 | -1.740424 | H | 11.450941 | -0.226501 | -3.935473 |
| H | -10.503796 | -0.864613 | -1.826539 | H | 11.105571 | -0.425466 | -2.191601 |
| H | -10.938175 | -1.763433 | -3.308975 | H | 11.564845 | -1.841543 | -3.179732 |
| H | 2.429525   | -1.427279 | 1.202670  | H | -3.088183 | 2.006557  | 0.710861  |

**Table S6.** Cartesian coordinates of computed DFT model of (*R,R*)-[C\*-NI]<sub>2</sub> **III**,  
 $E(\text{B3LYP}) = -4388.57797520$  Hartree.

|   |           |           |           |   |           |           |           |
|---|-----------|-----------|-----------|---|-----------|-----------|-----------|
| C | -1.103489 | 0.101098  | 1.234185  | C | 0.901097  | -1.264613 | -1.108296 |
| C | -2.474900 | 0.708368  | -0.532768 | C | 2.249884  | 0.599924  | -0.809412 |
| C | -0.828916 | 2.284477  | 0.217495  | C | 0.627937  | 0.637250  | -2.575993 |
| C | -0.462393 | 1.346248  | 1.179147  | C | 0.251341  | -0.639196 | -2.189731 |
| N | -2.129857 | -0.176103 | 0.393219  | N | 1.901921  | -0.638715 | -0.455927 |
| C | -1.830619 | 1.947447  | -0.691959 | C | 1.636156  | 1.290476  | -1.865040 |
| C | -0.691337 | -0.965835 | 2.165675  | C | 0.520284  | -2.606245 | -0.624000 |
| C | 0.125275  | -3.238979 | 3.873719  | C | -0.216930 | -5.216275 | 0.550129  |
| C | 0.582679  | -0.937379 | 2.879458  | C | -0.763885 | -3.224926 | -0.942626 |
| C | -1.458561 | -2.083217 | 2.379355  | C | 1.336932  | -3.334403 | 0.203399  |
| C | -1.072128 | -3.187771 | 3.230692  | C | 0.987735  | -4.622302 | 0.764575  |
| C | 1.003214  | -2.112024 | 3.699843  | C | -1.143251 | -4.519379 | -0.303690 |
| N | 2.184227  | -1.919090 | 4.199346  | N | -2.339419 | -4.870189 | -0.660988 |
| N | 1.499099  | -0.019227 | 2.925400  | N | -1.721241 | -2.820829 | -1.720571 |
| C | 2.570926  | -0.564478 | 3.758613  | C | -2.779620 | -3.826251 | -1.607491 |
| C | 3.874813  | -0.588555 | 3.001659  | C | -4.075972 | -3.193459 | -1.166575 |
| C | 2.786460  | 0.317187  | 5.025889  | C | -3.042325 | -4.503040 | -2.987827 |
| C | 4.030984  | -0.128938 | 5.808459  | C | -4.276742 | -5.415985 | -2.933776 |
| C | 5.329882  | 0.018893  | 4.988292  | C | -5.572472 | -4.640396 | -2.615640 |
| C | 5.112714  | -0.384184 | 3.558607  | C | -5.326286 | -3.586749 | -1.575133 |
| C | 6.068167  | -0.551547 | 2.495657  | C | -6.262838 | -2.738896 | -0.884941 |
| C | 5.318214  | -0.831551 | 1.312421  | C | -5.489533 | -1.840153 | -0.087938 |
| N | 3.984136  | -0.864370 | 1.647870  | N | -4.160626 | -2.148879 | -0.261074 |
| C | 5.963291  | -1.013563 | 0.082536  | C | -6.109409 | -0.851647 | 0.688566  |
| C | 7.471219  | -0.500110 | 2.432484  | C | -7.665179 | -2.650514 | -0.866988 |
| C | 8.101731  | -0.724717 | 1.211155  | C | -8.270962 | -1.682809 | -0.068307 |
| C | 7.351797  | -0.971572 | 0.043999  | C | -7.498002 | -0.789051 | 0.699849  |
| H | -3.285358 | 0.441472  | -1.206844 | H | 3.038858  | 1.053229  | -0.219798 |
| H | -0.311554 | 3.234591  | 0.170696  | H | 0.140575  | 1.143246  | -3.402485 |
| H | 0.341194  | 1.563685  | 1.867887  | H | -0.548995 | -1.153211 | -2.702710 |
| H | -2.425476 | -2.159618 | 1.901247  | H | 2.311941  | -2.941220 | 0.460105  |
| H | -1.776366 | -4.008441 | 3.324772  | H | 1.726314  | -5.102246 | 1.399043  |
| H | 2.889556  | 1.354136  | 4.688793  | H | -3.182382 | -3.702409 | -3.721835 |
| H | 1.886134  | 0.248077  | 5.644392  | H | -2.146376 | -5.067171 | -3.265171 |
| H | 4.104995  | 0.461899  | 6.727962  | H | -4.380833 | -5.931530 | -3.894766 |
| H | 3.900449  | -1.174863 | 6.104446  | H | -4.110286 | -6.183069 | -2.170524 |
| H | 5.672388  | 1.063973  | 5.018324  | H | -5.952708 | -4.160395 | -3.529655 |
| H | 6.130010  | -0.575266 | 5.446669  | H | -6.354696 | -5.338204 | -2.292095 |
| H | 8.053564  | -0.290310 | 3.325001  | H | -8.266210 | -3.328107 | -1.466547 |
| H | 9.184730  | -0.692332 | 1.145153  | H | -9.353287 | -1.603668 | -0.038321 |
| H | 7.851688  | -1.108930 | -0.909244 | H | -7.980951 | -0.023717 | 1.298400  |
| N | 5.200000  | -1.186768 | -1.130834 | N | -5.323530 | 0.111512  | 1.424167  |
| H | 4.755627  | 1.704021  | -3.946455 | H | -5.035575 | 4.051702  | 0.449906  |
| C | 4.194245  | 0.794043  | -4.126347 | C | -4.396835 | 3.722834  | 1.260568  |
| C | 4.300484  | -0.252169 | -3.221593 | C | -4.442388 | 2.398676  | 1.670940  |
| C | 2.621889  | -0.472825 | -5.462866 | C | -2.716034 | 4.221039  | 2.934041  |
| C | 3.577055  | -1.454011 | -3.431074 | C | -3.646767 | 1.960989  | 2.759547  |
| C | 3.353360  | 0.681581  | -5.251454 | C | -3.530191 | 4.635316  | 1.895690  |
| C | 2.715986  | -1.568059 | -4.564684 | C | -2.758764 | 2.880234  | 3.397982  |
| C | 3.681496  | -2.535619 | -2.519626 | C | -3.719358 | 0.622003  | 3.220892  |

|   |           |           |           |   |           |           |           |
|---|-----------|-----------|-----------|---|-----------|-----------|-----------|
| H | 3.274636  | 1.512048  | -5.945247 | H | -3.503423 | 5.666879  | 1.559165  |
| H | 1.303761  | -2.849800 | -5.590052 | H | -1.256447 | 3.103089  | 4.942209  |
| H | 1.961927  | -0.554541 | -6.321909 | H | -2.037724 | 4.921287  | 3.413648  |
| C | 2.954779  | -3.697444 | -2.729581 | C | -2.934404 | 0.208238  | 4.285683  |
| H | 3.044224  | -4.509102 | -2.016899 | H | -3.002326 | -0.820638 | 4.619496  |
| C | 2.092302  | -3.809408 | -3.839822 | C | -2.038346 | 1.105214  | 4.904136  |
| H | 1.516608  | -4.718399 | -3.979559 | H | -1.413712 | 0.758482  | 5.720770  |
| C | 1.972629  | -2.766249 | -4.738156 | C | -1.948846 | 2.413157  | 4.468056  |
| C | 5.123146  | -0.084224 | -2.005501 | C | -5.296004 | 1.438064  | 0.938969  |
| C | 4.529841  | -2.413150 | -1.317054 | C | -4.600399 | -0.350524 | 2.542063  |
| O | 5.696709  | 0.967268  | -1.731979 | O | -5.940567 | 1.751433  | -0.057092 |
| O | 4.647569  | -3.308866 | -0.485872 | O | -4.698755 | -1.521971 | 2.897016  |
| H | 0.427319  | -4.080038 | 4.487932  | H | -0.490588 | -6.166549 | 0.995152  |
| O | -2.234182 | 2.695811  | -1.745558 | O | 1.947471  | 2.559984  | -2.237507 |
| C | -1.639385 | 3.985945  | -1.939091 | C | 3.030666  | 3.201105  | -1.544930 |
| H | -1.819788 | 4.605754  | -1.053144 | H | 2.765062  | 3.360018  | -0.492235 |
| H | -0.554436 | 3.892881  | -2.081783 | H | 3.922293  | 2.570603  | -1.603473 |
| C | -2.253526 | 4.589563  | -3.198373 | C | 3.279160  | 4.543399  | -2.223546 |
| H | -1.881583 | 5.621280  | -3.299863 | H | 3.595208  | 4.384364  | -3.264783 |
| H | -1.927571 | 4.018120  | -4.071645 | H | 2.356778  | 5.131182  | -2.229396 |
| O | -3.672228 | 4.541671  | -3.232455 | O | 4.239036  | 5.314051  | -1.510667 |
| C | -4.346311 | 5.304582  | -2.235984 | C | 5.590349  | 4.837928  | -1.560085 |
| H | -4.385656 | 6.365675  | -2.522316 | H | 6.236714  | 5.716377  | -1.657434 |
| H | -3.844768 | 5.234709  | -1.263805 | H | 5.749164  | 4.197413  | -2.437388 |
| H | 3.196671  | -0.954899 | 0.997272  | C | 5.962383  | 4.080764  | -0.286128 |
| C | -5.742215 | 4.715148  | -2.097413 | H | 5.728700  | 4.699743  | 0.594785  |
| H | -6.316467 | 4.850771  | -3.026570 | H | 5.394815  | 3.144615  | -0.207977 |
| H | -5.659427 | 3.638343  | -1.892909 | O | 7.352589  | 3.796763  | -0.348822 |
| O | -6.378105 | 5.380170  | -1.010634 | C | 7.753021  | 2.837829  | 0.627835  |
| C | -7.656605 | 4.827642  | -0.702960 | H | 7.565132  | 3.206831  | 1.647453  |
| H | -8.342465 | 4.919091  | -1.557784 | H | 7.224516  | 1.887772  | 0.484496  |
| H | -7.566536 | 3.769515  | -0.423124 | H | 8.825489  | 2.675198  | 0.499503  |
| H | -8.056132 | 5.397006  | 0.139222  | H | -3.366596 | -1.585950 | 0.068964  |

**Table S7.** Cartesian coordinates of computed DFT model of *meso*-[C\*-NI]<sub>2</sub>,  
 $E(\text{B3LYP}) = -4388.58717457$  Hartree.

|   |           |           |           |   |           |           |           |
|---|-----------|-----------|-----------|---|-----------|-----------|-----------|
| O | 3.204308  | -1.652151 | -3.449395 | O | -3.203787 | 1.652197  | 3.448928  |
| O | -5.277066 | -1.606818 | -2.281056 | O | 5.276695  | 1.606816  | 2.280928  |
| O | 6.741570  | -1.513399 | -0.552375 | O | -6.741661 | 1.513150  | 0.552665  |
| O | -8.049279 | -2.342447 | -2.304527 | O | 8.048840  | 2.342707  | 2.305589  |
| N | 4.973014  | -1.573301 | -2.002676 | N | -4.972799 | 1.573204  | 2.002586  |
| O | -9.477107 | -0.139749 | -1.157976 | O | 9.476577  | 0.139775  | 1.159396  |
| N | 3.146693  | -2.842766 | 0.016499  | N | -3.146750 | 2.842781  | -0.016761 |
| H | 2.956509  | -1.832275 | 0.025848  | H | -2.956656 | 1.832277  | -0.026254 |
| N | -2.820023 | -0.033657 | -0.200089 | N | 2.819885  | 0.033740  | 0.199631  |
| N | 0.243442  | -2.950457 | 1.134488  | N | -0.243531 | 2.950563  | -1.134878 |
| N | 1.943563  | -2.360553 | 2.704709  | N | -1.943715 | 2.360692  | -2.705048 |
| C | 5.962161  | -0.887909 | -1.263517 | C | -5.962066 | 0.887726  | 1.263667  |
| C | 5.022270  | 1.244761  | -2.199662 | C | -5.021752 | -1.244867 | 2.199558  |
| C | 4.026376  | -0.964681 | -2.848879 | C | -4.025903 | 0.964658  | 2.848562  |
| C | 4.868179  | -3.001079 | -1.810169 | C | -4.868093 | 3.000990  | 1.810046  |
| C | 3.990275  | -3.502361 | -0.843463 | C | -3.990296 | 3.502328  | 0.843270  |
| C | 0.061014  | -1.734715 | 1.546672  | C | -0.061084 | 1.734852  | -1.547151 |
| C | 2.492345  | -3.787476 | 0.786456  | C | -2.492450 | 3.787526  | -0.786712 |
| C | 5.978559  | 0.586102  | -1.382146 | C | -5.978317 | -0.586289 | 1.382301  |
| C | 2.888030  | -5.056394 | 0.440158  | C | -2.888135 | 5.056427  | -0.440342 |
| C | 3.864800  | -4.904332 | -0.608376 | C | -3.864840 | 4.904312  | 0.608242  |
| C | -2.054355 | -1.067324 | 0.228572  | C | 2.054298  | 1.067434  | -0.229105 |
| C | 4.061162  | 0.508981  | -2.938527 | C | -4.060530 | -0.509007 | 2.938193  |
| C | -4.188988 | -1.545236 | -1.478548 | C | 4.188726  | 1.545274  | 1.478277  |
| C | -0.956536 | -0.756566 | 1.167977  | C | 0.956518  | 0.756716  | -1.168566 |
| C | -2.333978 | -2.372456 | -0.202792 | C | 2.333919  | 2.372560  | 0.202281  |
| H | -1.709465 | -3.188763 | 0.131595  | H | 1.709473  | 3.188891  | -0.132171 |
| C | 1.455289  | -3.429792 | 1.823424  | C | -1.455425 | 3.429900  | -1.823734 |
| C | 6.895951  | 1.320912  | -0.645980 | C | -6.895865 | -1.321180 | 0.646404  |
| H | 7.594093  | 0.812764  | 0.009598  | H | -7.594301 | -0.813106 | -0.008917 |
| C | 2.325882  | -6.293647 | 1.077834  | C | -2.326035 | 6.293714  | -1.077992 |
| C | 5.006389  | 2.672251  | -2.253709 | C | -5.005720 | -2.672357 | 2.253585  |
| C | -3.834133 | -0.262863 | -1.024573 | C | 3.833905  | 0.262914  | 1.024234  |
| H | -4.417909 | 0.593601  | -1.353675 | H | 4.417629  | -0.593566 | 1.353384  |
| C | 5.621912  | -3.898450 | -2.554416 | C | -5.621772 | 3.898321  | 2.554396  |
| H | 6.305228  | -3.514420 | -3.305197 | H | -6.305002 | 3.514256  | 3.305237  |
| C | 1.124652  | -1.370580 | 2.532014  | C | -1.124761 | 1.370737  | -2.532456 |
| C | 4.638901  | -5.796934 | -1.370781 | C | -4.638891 | 5.796869  | 1.370751  |
| H | 4.562184  | -6.868385 | -1.209332 | H | -4.562187 | 6.868331  | 1.209360  |
| C | -3.407795 | -2.621368 | -1.056997 | C | 3.407635  | 2.621437  | 1.056622  |
| H | -3.616571 | -3.635968 | -1.373740 | H | 3.616426  | 3.636030  | 1.373371  |
| C | 1.157508  | -0.057994 | 3.123356  | C | -1.157599 | 0.058185  | -3.123873 |
| H | 1.927188  | 0.201831  | 3.841316  | H | -1.927308 | -0.201626 | -3.841807 |
| C | -0.818415 | 0.478754  | 1.744974  | C | 0.818439  | -0.478567 | -1.745652 |
| H | -1.522439 | 1.259979  | 1.497382  | H | 1.522509  | -1.259777 | -1.498133 |
| C | 5.968772  | 3.393389  | -1.496846 | C | -5.968243 | -3.393578 | 1.496980  |
| H | 5.956409  | 4.479408  | -1.533004 | H | -5.955776 | -4.479595 | 1.533133  |
| C | 5.506847  | -5.287844 | -2.335608 | C | -5.506756 | 5.287726  | 2.335621  |
| H | 6.110044  | -5.966117 | -2.931270 | H | -6.109920 | 5.965965  | 2.931354  |
| C | 6.893649  | 2.729928  | -0.714178 | C | -6.893410 | -2.730194 | 0.714588  |

|   |            |           |           |   |           |           |           |
|---|------------|-----------|-----------|---|-----------|-----------|-----------|
| H | 7.608612   | 3.280442  | -0.113566 | H | -7.608507 | -3.280759 | 0.114184  |
| C | 3.109661   | 1.168576  | -3.702332 | C | -3.108770 | -1.168522 | 3.701745  |
| H | 2.373244   | 0.583954  | -4.241875 | H | -2.372261 | -0.583838 | 4.241096  |
| C | -10.095089 | -1.338545 | -1.604464 | C | 10.094672 | 1.338437  | 1.606090  |
| H | -11.133761 | -1.146128 | -1.917666 | H | 11.133219 | 1.145814  | 1.919570  |
| H | -10.114354 | -2.084958 | -0.794318 | H | 10.114308 | 2.084866  | 0.795962  |
| C | 0.209952   | 0.823467  | 2.705602  | C | -0.209970 | -0.823260 | -2.706243 |
| H | 0.197085   | 1.835463  | 3.097539  | H | -0.197088 | -1.835231 | -3.098248 |
| C | -7.125590  | -2.679045 | -3.327964 | C | 7.124722  | 2.678992  | 3.328742  |
| C | -5.769186  | -2.892132 | -2.691939 | C | 5.768542  | 2.892096  | 2.692237  |
| H | -5.867103  | -3.550427 | -1.821722 | H | 5.866731  | 3.550584  | 1.822194  |
| H | -5.075109  | -3.342027 | -3.412809 | H | 5.074141  | 3.341770  | 3.412931  |
| C | 4.013308   | 3.314443  | -3.039442 | C | -4.012369 | -3.314466 | 3.039045  |
| H | 3.989418   | 4.400296  | -3.069198 | H | -3.988368 | -4.400317 | 3.068784  |
| C | 1.136598   | -4.699963 | 2.662525  | C | -1.136790 | 4.700113  | -2.662797 |
| C | -9.308637  | -1.880959 | -2.779371 | C | 9.307985  | 1.880989  | 2.780786  |
| H | -9.869616  | -2.703020 | -3.251480 | H | 9.868978  | 2.702939  | 3.253070  |
| H | -9.167756  | -1.084414 | -3.525226 | H | 9.166737  | 1.084464  | 3.526587  |
| C | 3.083541   | 2.577029  | -3.749088 | C | -3.082490 | -2.576973 | 3.748463  |
| H | 2.322236   | 3.078963  | -4.337251 | H | -2.320977 | -3.078841 | 4.336412  |
| C | -10.073937 | 0.404702  | 0.012762  | C | 10.073836 | -0.404930 | -0.011003 |
| H | -10.054350 | -0.319951 | 0.840756  | H | 10.054783 | 0.319628  | -0.839091 |
| H | -11.116208 | 0.703915  | -0.171933 | H | 11.115959 | -0.704343 | 0.174210  |
| H | -9.479756  | 1.276572  | 0.291776  | H | 9.479599  | -1.276702 | -0.290203 |
| H | -7.060403  | -1.873877 | -4.074947 | H | 7.059309  | 1.873654  | 4.075521  |
| H | -7.430006  | -3.603593 | -3.843554 | H | 7.428861  | 3.603452  | 3.844655  |
| C | 1.001385   | -5.955710 | 1.790462  | C | -1.001562 | 5.955826  | -1.790686 |
| H | 3.040421   | -6.710853 | 1.802959  | H | -3.040613 | 6.710933  | -1.803070 |
| H | 0.214146   | -5.793922 | 1.044663  | H | -0.214296 | 5.794010  | -1.044922 |
| H | 1.956521   | -4.828437 | 3.376841  | H | -1.956744 | 4.828603  | -3.377075 |
| H | 0.222018   | -4.506001 | 3.231464  | H | -0.222230 | 4.506189  | -3.231781 |
| H | 2.162084   | -7.073298 | 0.324074  | H | -2.162216 | 7.073342  | -0.324211 |
| H | 0.687975   | -6.796049 | 2.419805  | H | -0.688182 | 6.796194  | -2.420004 |

**Table S8.** Cartesian coordinates of computed DFT model of (*R*)-**C\*-P2**,  
 $E(\text{B3LYP}) = -2143.28019601$  Hartree.

|   |           |           |           |   |            |           |           |
|---|-----------|-----------|-----------|---|------------|-----------|-----------|
| C | 3.468803  | 2.034529  | -3.799089 | C | -6.494634  | -1.068663 | 0.278851  |
| C | 1.832019  | 3.615083  | -2.171543 | C | -7.739858  | -1.937978 | 0.214857  |
| C | 2.877009  | 3.211376  | -4.302305 | O | -8.477448  | -1.513029 | -0.920636 |
| C | 3.259968  | 1.600856  | -2.483761 | C | -9.682206  | -2.246146 | -1.113872 |
| C | 2.435214  | 2.417180  | -1.685778 | H | 4.086977   | 1.428851  | -4.455418 |
| C | 2.056659  | 4.004804  | -3.503666 | H | 3.062070   | 3.493976  | -5.334522 |
| N | 2.071831  | 2.280618  | -0.360961 | H | 1.602846   | 4.909360  | -3.898226 |
| C | 1.279610  | 3.355853  | -0.003552 | H | 0.903035   | 6.320065  | -0.986009 |
| C | 1.089774  | 4.187525  | -1.077401 | H | -0.361259  | 5.531791  | -1.917280 |
| C | 0.253521  | 5.432642  | -1.014446 | H | -1.073653  | 6.397199  | 0.413548  |
| C | -0.645175 | 5.404384  | 0.238236  | H | -1.479910  | 4.713066  | 0.075793  |
| C | 0.129698  | 4.966351  | 1.489485  | H | 0.998382   | 5.614739  | 1.644211  |
| C | 0.660627  | 3.509336  | 1.362127  | H | -0.496243  | 5.020528  | 2.385290  |
| C | 3.874155  | 0.358136  | -1.953005 | H | 2.056929   | -0.355244 | -1.028392 |
| C | 5.052259  | -2.006635 | -0.922104 | H | 5.825090   | 0.772220  | -2.771159 |
| C | 3.113232  | -0.547607 | -1.194886 | H | 1.862034   | -2.435709 | 0.300999  |
| C | 5.225580  | 0.069828  | -2.198812 | H | 2.885696   | -4.482457 | 1.207554  |
| C | 5.828921  | -1.096325 | -1.702344 | H | 8.637012   | -4.865500 | -0.314962 |
| C | 3.675745  | -1.721664 | -0.671113 | H | 7.271065   | -6.433629 | 1.034806  |
| C | 2.909586  | -2.655571 | 0.113000  | H | 4.879075   | -5.956185 | 1.478886  |
| C | 3.477370  | -3.789535 | 0.615257  | H | 7.804747   | -0.709761 | -2.533056 |
| C | 4.863416  | -4.101051 | 0.380062  | H | 8.832532   | -2.755070 | -1.629391 |
| C | 5.646428  | -3.192768 | -0.398123 | H | -0.761294  | -0.758501 | 4.641348  |
| C | 7.024937  | -3.473500 | -0.651361 | H | 1.381827   | -0.040427 | 5.582210  |
| C | 7.589433  | -4.648476 | -0.124483 | H | -2.321693  | 1.497469  | 0.882994  |
| C | 6.818455  | -5.530794 | 0.635520  | H | -4.338855  | -2.151005 | 3.441514  |
| C | 5.470856  | -5.263405 | 0.886720  | H | -4.477230  | 0.566437  | 0.099939  |
| C | 7.215413  | -1.404442 | -1.940658 | H | -5.894310  | -1.197125 | -0.630110 |
| C | 7.784750  | -2.538141 | -1.439359 | H | -6.772992  | -0.012273 | 0.377426  |
| N | -0.455196 | 2.554525  | 1.496757  | H | -7.454889  | -2.996941 | 0.125004  |
| N | 1.643633  | 3.231613  | 2.414055  | H | -8.330474  | -1.817073 | 1.135291  |
| C | 1.160948  | 2.228171  | 3.080406  | H | -9.466266  | -3.315661 | -1.255501 |
| C | -0.151769 | 1.798360  | 2.505524  | H | -10.343881 | -2.140978 | -0.241132 |
| C | -0.877532 | 0.671926  | 3.093019  | H | 2.449403   | 1.601377  | 0.282250  |
| C | -0.265847 | 0.083689  | 4.171939  | H | 2.674416   | 1.863979  | 4.631657  |
| C | 1.003712  | 0.510305  | 4.726019  | C | -10.362279 | -1.684491 | -2.352440 |
| C | 1.722355  | 1.549218  | 4.218753  | H | -10.575195 | -0.613592 | -2.209678 |
| C | -2.173742 | 0.171564  | 2.576865  | H | -9.697266  | -1.787058 | -3.224082 |
| C | -4.584324 | -0.878542 | 1.717262  | O | -11.564159 | -2.415881 | -2.546437 |
| C | -2.790711 | 0.689034  | 1.427690  | C | -12.298914 | -1.979273 | -3.683667 |
| N | -2.747511 | -0.839728 | 3.274435  | H | -12.593603 | -0.923958 | -3.586380 |
| C | -3.902209 | -1.341194 | 2.860798  | H | -11.713117 | -2.099915 | -4.606841 |
| C | -4.007653 | 0.162371  | 0.988698  | H | -13.196272 | -2.598656 | -3.744199 |
| O | -5.757847 | -1.500026 | 1.429035  |   |            |           |           |



**Table S9.** Cartesian coordinates of computed DFT model of  $(R,R)$ -[C\*-P2]<sub>2</sub> I,  
 $E(\text{B3LYP}) = -4286.62485327$  Hartree.

|   |           |           |           |   |           |           |           |
|---|-----------|-----------|-----------|---|-----------|-----------|-----------|
| C | -2.079844 | -1.125336 | 1.024563  | C | 3.626436  | 2.201676  | 0.495468  |
| C | -3.976961 | -1.745048 | -0.160805 | C | 4.965073  | 2.217015  | 1.050473  |
| C | -4.258297 | -0.696731 | 1.980909  | N | 5.677653  | 0.651740  | -0.602238 |
| C | -2.875444 | -0.622986 | 2.073729  | N | 6.452789  | -0.163911 | -1.247263 |
| N | -2.647722 | -1.675085 | -0.067955 | C | 4.261587  | -0.163438 | -2.202929 |
| C | -4.837120 | -1.267795 | 0.843693  | C | 5.611981  | -0.730710 | -2.317479 |
| C | -0.600360 | -1.093378 | 1.058186  | C | 5.556322  | -2.234659 | -2.217096 |
| C | 2.353698  | -1.168907 | 1.036067  | C | 6.217531  | -0.368494 | -3.706925 |
| C | 0.168652  | -0.389276 | 2.081547  | C | 7.458596  | -1.213103 | -4.027331 |
| C | 0.144677  | -1.716864 | 0.092538  | C | 7.112564  | -2.710039 | -4.152547 |
| C | 1.590523  | -1.748908 | 0.073082  | C | 6.213300  | -3.128725 | -3.026113 |
| C | 1.661583  | -0.443232 | 2.066059  | C | 5.815552  | -4.444657 | -2.592407 |
| N | 2.156485  | 0.259890  | 3.035708  | N | 4.915144  | -4.267176 | -1.502441 |
| N | -0.231487 | 0.362536  | 3.059257  | C | 4.786276  | -2.911356 | -1.288452 |
| C | 0.988688  | 0.838334  | 3.727592  | C | 4.255033  | -5.335170 | -0.871641 |
| C | 1.073305  | 2.344468  | 3.663652  | C | 6.092436  | -5.750272 | -3.037685 |
| C | 0.964559  | 0.404382  | 5.220640  | C | 5.457315  | -6.820182 | -2.411120 |
| C | 1.959654  | 1.194736  | 6.079062  | H | 4.544051  | -6.614486 | -1.353198 |
| C | 1.604234  | 2.693334  | 6.113407  | H | -1.111174 | 2.081517  | 0.183511  |
| C | 1.353114  | 3.182322  | 4.716572  | H | -0.109046 | 0.713812  | -3.772096 |
| C | 1.390089  | 4.515626  | 4.175146  | H | 2.288438  | 0.757222  | -3.076533 |
| C | 1.137320  | 4.397729  | 2.775450  | H | 2.888709  | 2.811771  | 0.994689  |
| N | 0.924967  | 3.063551  | 2.491769  | H | 5.133855  | 2.849705  | 1.916677  |
| C | 1.147329  | 5.506317  | 1.910804  | H | 5.437817  | -0.543963 | -4.455440 |
| C | 1.633562  | 5.788854  | 4.721965  | H | 6.450324  | 0.700539  | -3.704698 |
| C | 1.633810  | 6.894098  | 3.874279  | H | 7.904418  | -0.853172 | -4.960927 |
| C | 1.399879  | 6.752682  | 2.488007  | H | 8.202263  | -1.071495 | -3.235039 |
| H | -4.368700 | -2.183563 | -1.072835 | H | 6.616000  | -2.897604 | -5.116234 |
| H | -4.897759 | -0.315067 | 2.770537  | H | 8.030437  | -3.310388 | -4.159026 |
| H | -2.404677 | -0.179469 | 2.940348  | H | 6.778371  | -5.918653 | -3.862961 |
| H | -0.379130 | -2.232879 | -0.702401 | H | 5.656603  | -7.834560 | -2.744237 |
| H | 2.050864  | -2.281523 | -0.751823 | H | 4.050636  | -7.468086 | -0.897034 |
| H | -0.054545 | 0.564101  | 5.588224  | C | -0.803115 | -5.476707 | -0.384005 |
| H | 1.167744  | -0.667277 | 5.256829  | C | -0.507671 | -5.075719 | 0.581768  |
| H | 1.961006  | 0.782996  | 7.094592  | C | 0.897058  | -4.940568 | 0.866070  |
| H | 2.969741  | 1.065809  | 5.672574  | C | -1.083415 | -4.135256 | 2.760526  |
| H | 0.715566  | 2.848346  | 6.743610  | C | 1.292698  | -4.405211 | 2.128753  |
| H | 2.415094  | 3.266562  | 6.579123  | C | -1.452033 | -4.685053 | 1.483771  |
| H | 1.824175  | 5.905602  | 5.785209  | C | 0.304553  | -4.008737 | 3.077900  |
| H | 1.822611  | 7.884368  | 4.278788  | H | 2.679552  | -4.228772 | 2.419146  |
| H | 1.418643  | 7.630766  | 1.848423  | C | -2.508176 | -4.767769 | 1.243368  |
| H | -2.759066 | 5.130682  | -1.356078 | H | 3.051175  | -3.690084 | 3.700742  |
| C | -1.912553 | 4.895003  | -1.995712 | C | 4.107293  | -3.560604 | 3.921166  |
| C | -0.589036 | 4.969281  | -1.434910 | H | 2.107298  | -3.333059 | 4.618383  |
| C | -1.006854 | 4.190256  | -4.152923 | C | 2.406874  | -2.921819 | 5.578694  |
| C | 0.527602  | 4.685399  | -2.278368 | C | 0.701704  | -3.467347 | 4.339133  |
| C | -2.111418 | 4.519492  | -3.291314 | C | 1.885038  | -5.272398 | -0.075390 |
| C | 0.320404  | 4.291945  | -3.633306 | H | 3.631506  | -4.552481 | 1.437463  |
| H | 1.850918  | 4.760196  | -1.748977 | H | 6.983549  | 1.478056  | 0.961134  |
| C | -3.118704 | 4.448284  | -3.692871 | H | -2.098078 | 1.286642  | -2.257784 |

|   |            |           |           |   |           |           |           |
|---|------------|-----------|-----------|---|-----------|-----------|-----------|
| H | 2.959899   | 4.450202  | -2.611306 | O | -3.136480 | 1.592304  | -1.319463 |
| C | 3.964282   | 4.503456  | -2.200502 | C | -3.091042 | 0.910924  | -0.464216 |
| H | 2.762199   | 4.068351  | -3.905469 | H | -3.022722 | 2.623156  | -0.968987 |
| C | 3.609188   | 3.817942  | -4.538713 | H | -4.452991 | 1.389813  | -2.068611 |
| C | 1.438782   | 3.967185  | -4.461564 | C | -4.626718 | 2.220369  | -2.769083 |
| H | -0.365288  | 5.266413  | -0.080591 | H | -4.389797 | 0.460036  | -2.640280 |
| H | 2.025965   | 5.084698  | -0.395037 | H | -5.555625 | 1.233000  | -1.187429 |
| O | 3.436994   | -1.202693 | 1.047217  | O | -5.857186 | 2.377906  | -0.393810 |
| C | -6.193927  | -1.323058 | 0.798986  | C | -6.002801 | 3.263870  | -1.030012 |
| H | -6.826547  | -1.732479 | -0.422502 | H | -5.050268 | 2.592505  | 0.320233  |
| H | -6.519996  | -1.068036 | -1.237189 | H | -7.129511 | 2.055601  | 0.372284  |
| C | -6.548563  | -2.765767 | -0.661071 | C | -7.953004 | 1.862785  | -0.333555 |
| H | -8.329843  | -1.610804 | -0.179720 | H | -6.973072 | 1.147376  | 0.972338  |
| H | -8.627654  | -2.247992 | 0.665478  | H | -7.428609 | 3.169120  | 1.201909  |
| O | -8.572145  | -0.574673 | 0.069646  | O | -8.592185 | 2.964329  | 1.994161  |
| C | -9.075119  | -1.930384 | -1.347640 | C | -9.479673 | 2.803403  | 1.364339  |
| H | -9.236788  | -3.326212 | -1.594058 | H | -8.471038 | 2.099035  | 2.662485  |
| H | -9.665880  | -3.824683 | -0.712463 | H | -8.736577 | 3.865097  | 2.594487  |
| H | -8.278674  | -3.808752 | -1.830366 | H | 4.213709  | -2.487926 | -0.577528 |
| C | -10.179454 | -3.463583 | -2.779400 | H | 1.586845  | -5.659888 | -1.045783 |
| H | -11.150654 | -3.002872 | -2.541096 | C | 4.686270  | -4.396029 | 1.648346  |
| H | -9.759485  | -2.941639 | -3.653363 | H | -1.215066 | 5.441562  | 0.573868  |
| O | -10.330231 | -4.850638 | -3.045297 | C | 3.030802  | 5.126137  | 0.014950  |
| C | -11.197366 | -5.111611 | -4.142492 | C | 0.930164  | 5.308989  | 0.447992  |
| H | -12.208880 | -4.723676 | -3.952056 | C | 3.246004  | -5.069133 | 0.192405  |
| H | -10.813536 | -4.660570 | -5.069434 | H | -1.189492 | 3.760092  | -5.478641 |
| H | -11.245577 | -6.195829 | -4.263786 | C | -2.197893 | 3.675982  | -5.874829 |
| C | 0.879272   | 2.646434  | 1.553640  | H | 2.055800  | 3.287260  | -6.412199 |
| C | 1.848937   | 1.444890  | -1.077331 | H | 1.208162  | 3.541196  | -5.781316 |
| C | -0.394241  | 1.781590  | -0.572734 | C | -0.092238 | 3.437637  | -6.280204 |
| C | 0.180172   | 1.008932  | -2.768935 | C | -0.251678 | 3.102998  | -7.301040 |
| N | 1.510897   | 1.041583  | -2.381859 | C | -3.094175 | -3.780747 | 3.448178  |
| C | 0.889641   | 1.818640  | -0.205463 | H | -2.039309 | -3.707119 | 3.697068  |
| C | -0.806117  | 1.369030  | -1.847234 | C | -0.290880 | -3.070609 | 5.252592  |
| C | 3.247176   | 1.465605  | -0.596268 | H | 0.005461  | -2.661271 | 6.214289  |
| C | 5.984281   | 1.474566  | 0.539784  | H | -1.644228 | -3.183322 | 4.929307  |
| C | 4.304028   | 0.653162  | -1.195498 | C | -2.396155 | -2.855650 | 5.641089  |

**Table S10.** Cartesian coordinates of computed DFT model of (*R,R*)-[C\*-P2]<sub>2</sub> II,  $E(\text{B3LYP}) = -4286.62685674$  Hartree.

|   |           |           |           |   |           |           |           |
|---|-----------|-----------|-----------|---|-----------|-----------|-----------|
| C | -1.650773 | -4.718184 | -0.876475 | C | -1.058022 | -2.198910 | 1.237087  |
| C | -3.811678 | -3.918798 | -1.088136 | C | -2.061709 | -2.419579 | 2.258479  |
| C | -3.322417 | -5.431975 | 0.712996  | N | -3.584178 | -1.012345 | 1.083955  |
| C | -2.015908 | -5.478100 | 0.252609  | N | -4.672540 | -0.359856 | 0.814308  |
| N | -2.553537 | -3.974550 | -1.538463 | C | -3.037706 | 0.007251  | -0.888212 |
| C | -4.245903 | -4.615056 | 0.051437  | C | -4.399611 | 0.340531  | -0.454719 |
| C | -0.261073 | -4.695982 | -1.383297 | C | -4.543637 | 1.831126  | -0.271668 |
| C | 2.489628  | -4.646594 | -2.453791 | C | -5.430145 | -0.088128 | -1.539581 |
| C | 0.884083  | -4.840004 | -0.493803 | C | -6.824120 | 0.483047  | -1.247269 |
| C | 0.034696  | -4.494163 | -2.704390 | C | -6.840706 | 2.022924  | -1.317057 |
| C | 1.386746  | -4.468390 | -3.232195 | C | -5.625028 | 2.590894  | -0.644079 |
| C | 2.270633  | -4.828423 | -1.040957 | C | -5.295134 | 3.956447  | -0.322735 |
| N | 3.137875  | -4.963551 | -0.085383 | N | -3.991177 | 3.944510  | 0.252551  |
| N | 0.915243  | -4.950770 | 0.797113  | C | -3.567715 | 2.632322  | 0.290603  |
| C | 2.336365  | -5.051719 | 1.152226  | C | -3.296489 | 5.117530  | 0.598131  |
| C | 2.758795  | -3.949546 | 2.093398  | C | -5.946124 | 5.189520  | -0.509936 |
| C | 2.562703  | -6.427159 | 1.852864  | C | -5.278529 | 6.358836  | -0.152546 |
| C | 3.883733  | -6.488360 | 2.627523  | H | -3.971260 | 6.322846  | 0.378879  |
| C | 3.894802  | -5.465267 | 3.778184  | H | 3.081766  | -1.655386 | -0.969182 |
| C | 3.464515  | -4.123922 | 3.259531  | H | 0.512288  | 0.095510  | -3.945558 |
| C | 3.761116  | -2.807933 | 3.756758  | H | -1.410331 | -0.373146 | -2.421870 |
| C | 3.221023  | -1.877953 | 2.817056  | H | -0.115751 | -2.713841 | 1.365206  |
| N | 2.604631  | -2.601190 | 1.814796  | H | -1.792410 | -3.074497 | 3.081479  |
| C | 3.451890  | -0.492735 | 2.922722  | H | -5.058203 | 0.277442  | -2.502167 |
| C | 4.486681  | -2.336214 | 4.865332  | H | -5.450818 | -1.179040 | -1.585857 |
| C | 4.683327  | -0.964899 | 4.999194  | H | -7.541954 | 0.071563  | -1.964345 |
| C | 4.189469  | -0.064983 | 4.031281  | H | -7.135643 | 0.153070  | -0.250725 |
| H | -4.487112 | -3.284319 | -1.651038 | H | -6.866248 | 2.347211  | -2.367925 |
| H | -3.635909 | -5.991916 | 1.588037  | H | -7.758583 | 2.408850  | -0.856532 |
| H | -1.276018 | -6.076779 | 0.767292  | H | -6.943349 | 5.228215  | -0.938886 |
| H | -0.784467 | -4.351424 | -3.401307 | H | -5.763809 | 7.320456  | -0.292095 |
| H | 1.501565  | -4.304294 | -4.299469 | H | -3.470069 | 7.253206  | 0.630700  |
| H | 1.724624  | -6.577943 | 2.541203  | C | 1.237159  | 6.847458  | -0.889842 |
| H | 2.508717  | -7.203466 | 1.083685  | C | 1.511374  | 6.258098  | -0.019675 |
| H | 4.020715  | -7.502396 | 3.019569  | C | 0.464201  | 5.617386  | 0.730167  |
| H | 4.717286  | -6.284674 | 1.945259  | C | 3.207855  | 5.318734  | 1.466030  |
| H | 3.224431  | -5.805953 | 4.581399  | C | 0.819600  | 4.810274  | 1.852401  |
| H | 4.896202  | -5.398587 | 4.220219  | C | 2.820861  | 6.109146  | 0.328105  |
| H | 4.899525  | -3.031966 | 5.590480  | C | 2.188015  | 4.668396  | 2.226546  |
| H | 5.243966  | -0.576837 | 5.844861  | H | -0.200711 | 4.135503  | 2.589293  |
| H | 4.399098  | 0.994601  | 4.129502  | C | 3.601596  | 6.582929  | -0.260553 |
| H | -0.734846 | 1.389693  | 0.685738  | H | 0.184151  | 3.331505  | 3.719371  |
| C | 0.044403  | 1.856875  | 0.091783  | C | -0.593506 | 2.812007  | 4.273133  |
| C | 1.405653  | 1.578575  | 0.453693  | H | 1.491369  | 3.210851  | 4.089263  |
| C | 0.766436  | 3.246566  | -1.775548 | C | 1.765744  | 2.593378  | 4.940379  |
| C | 2.447217  | 2.172652  | -0.318656 | C | 2.539768  | 3.875149  | 3.361349  |
| C | -0.263197 | 2.647770  | -0.972810 | C | -0.886529 | 5.728213  | 0.368698  |
| C | 2.130851  | 3.002512  | -1.433663 | H | -1.538462 | 4.265132  | 2.181940  |
| H | 3.809250  | 1.920605  | 0.022632  | H | -4.054287 | -2.031861 | 2.972147  |
| C | -1.297502 | 2.831037  | -1.245346 | H | 2.982683  | -0.359443 | -3.386276 |

|   |            |           |           |   |           |           |           |
|---|------------|-----------|-----------|---|-----------|-----------|-----------|
| H | 4.844412   | 2.529063  | -0.770624 | O | 4.325691  | -0.490294 | -2.894145 |
| C | 5.880236   | 2.335355  | -0.505308 | C | 4.416211  | -0.024186 | -1.907423 |
| H | 4.543070   | 3.319821  | -1.839562 | H | 4.593278  | -1.550874 | -2.820175 |
| C | 5.337225   | 3.765161  | -2.433222 | H | 5.214152  | 0.252223  | -3.889106 |
| C | 3.178047   | 3.584886  | -2.212165 | C | 5.108311  | -0.182052 | -4.893519 |
| H | 1.737830   | 0.719998  | 1.513409  | H | 4.900473  | 1.298838  | -3.926809 |
| H | 4.093585   | 1.068573  | 1.098998  | H | 6.573171  | 0.248762  | -3.470556 |
| O | 3.496919   | -4.630865 | -2.855531 | O | 7.286385  | -0.951287 | -3.763474 |
| C | -5.500368  | -4.549473 | 0.575797  | C | 7.255914  | -1.162546 | -4.842554 |
| H | -6.397953  | -3.548476 | 0.073518  | H | 6.862792  | -1.813992 | -3.231579 |
| H | -5.959177  | -2.553204 | 0.204586  | H | 8.723312  | -0.735800 | -3.315339 |
| C | -6.596876  | -3.724601 | -0.989797 | C | 9.158106  | 0.122095  | -3.851412 |
| H | -7.676411  | -3.645867 | 0.906505  | H | 8.748827  | -0.513253 | -2.237195 |
| H | -8.234314  | -4.559429 | 0.653069  | H | 9.442632  | -1.926711 | -3.601321 |
| O | -7.405082  | -3.686032 | 1.964797  | O | 10.811014 | -1.850166 | -3.220222 |
| C | -8.493514  | -2.492894 | 0.751640  | C | 11.329563 | -1.042049 | -3.756988 |
| H | -9.087639  | -2.345881 | -0.536175 | H | 10.914170 | -1.680121 | -2.138365 |
| H | -9.642150  | -3.254717 | -0.813224 | H | 11.271227 | -2.806100 | -3.479057 |
| H | -8.330289  | -2.156041 | -1.308108 | H | -2.659014 | 2.324108  | 0.597179  |
| C | -10.021295 | -1.148074 | -0.462611 | H | 3.072110  | 0.452311  | 1.836569  |
| H | -10.866746 | -1.359230 | 0.209938  | C | 0.941025  | 0.250973  | 2.083247  |
| H | -9.473252  | -0.283296 | -0.059785 | H | 5.129465  | 0.863760  | 1.354961  |
| O | -10.477957 | -0.882477 | -1.781354 | C | -0.561928 | 4.262529  | -3.134482 |
| C | -11.304006 | 0.273386  | -1.854788 | C | 0.476287  | 4.067745  | -2.878913 |
| H | -12.203573 | 0.161718  | -1.231865 | C | 2.841701  | 4.395333  | -3.309860 |
| H | -10.757447 | 1.171537  | -1.531224 | H | 1.261630  | 5.267312  | -4.483817 |
| H | -11.602492 | 0.390347  | -2.898725 | C | 1.504107  | 4.634250  | -3.635095 |
| C | 2.023980   | -2.215467 | 1.060906  | H | 3.635712  | 4.840673  | -3.903625 |
| C | -0.170052  | -1.229274 | -0.876991 | H | -1.155077 | 6.314883  | -0.505334 |
| C | 2.106207   | -1.348376 | -1.331071 | C | -2.314036 | 3.746819  | 2.740283  |
| C | 0.660943   | -0.384757 | -2.983994 | C | -1.890695 | 5.052188  | 1.075561  |
| N | -0.404824  | -0.649443 | -2.137765 | C | 3.893122  | 3.768512  | 3.723266  |
| C | 1.077595   | -1.595759 | -0.517626 | H | 4.162493  | 3.184948  | 4.598763  |
| C | 1.955985   | -0.703284 | -2.566213 | C | 5.328640  | 5.645283  | 1.267033  |
| C | -1.244920  | -1.425993 | 0.120276  | H | 4.550249  | 5.163525  | 1.852372  |
| C | -3.299967  | -1.858689 | 2.212579  | H | 4.885419  | 4.402283  | 2.973063  |
| C | -2.558870  | -0.790912 | 0.016753  | C | 5.927187  | 4.297868  | 3.261956  |

**Table S11.** Cartesian coordinates of computed DFT model of (*R,R*)-[C\*-P2]<sub>2</sub> III,  $E(\text{B3LYP}) = -4286.63843700$  Hartree.

|   |           |           |           |   |           |           |           |
|---|-----------|-----------|-----------|---|-----------|-----------|-----------|
| C | -1.170490 | -0.273613 | -1.149451 | C | 1.265393  | 4.077809  | -2.565711 |
| C | -2.558195 | -0.145286 | 0.699342  | C | -0.838994 | 4.545315  | -1.542227 |
| C | -1.047454 | -2.002598 | 0.543140  | N | -2.002940 | 5.085523  | -1.349547 |
| C | -0.618529 | -1.467968 | -0.669155 | N | -1.505765 | 3.531502  | 0.394432  |
| N | -2.150947 | 0.355783  | -0.456599 | C | -2.492815 | 4.500373  | -0.085844 |
| C | -2.025696 | -1.318626 | 1.261820  | C | -3.847504 | 3.853291  | -0.249231 |
| C | -0.725865 | 0.360416  | -2.403498 | C | -2.652921 | 5.656064  | 0.950986  |
| C | 0.119307  | 1.760953  | -4.869617 | C | -3.827397 | 6.575145  | 0.586129  |
| C | 0.508486  | -0.017983 | -3.086891 | C | -5.179707 | 5.833958  | 0.616116  |
| C | -1.434080 | 1.375567  | -2.995433 | C | -5.049076 | 4.457399  | 0.031707  |
| C | -1.036599 | 2.047740  | -4.211812 | C | -6.068727 | 3.481306  | -0.247298 |
| C | 0.944572  | 0.726746  | -4.305692 | C | -5.401499 | 2.301745  | -0.695577 |
| N | 2.087957  | 0.281786  | -4.726812 | N | -4.042819 | 2.561840  | -0.711725 |
| N | 1.377240  | -0.938754 | -2.801407 | C | -6.098235 | 1.111377  | -0.985147 |
| C | 2.426843  | -0.827121 | -3.813526 | C | -7.469397 | 3.478630  | -0.118618 |
| C | 3.777500  | -0.617739 | -3.174989 | C | -8.165723 | 2.308234  | -0.409110 |
| C | 2.507096  | -2.139031 | -4.653211 | C | -7.487258 | 1.142494  | -0.824319 |
| C | 3.713540  | -2.118810 | -5.603237 | H | 2.925629  | -0.961003 | 0.478504  |
| C | 5.057506  | -2.033900 | -4.849655 | H | 0.125512  | 0.385422  | 3.459855  |
| C | 4.960643  | -1.110102 | -3.669878 | H | -0.406166 | 2.301117  | 1.948163  |
| C | 5.994331  | -0.648832 | -2.783543 | H | 2.456019  | 2.506255  | -1.666288 |
| C | 5.353343  | 0.106166  | -1.754927 | H | 2.017184  | 4.229462  | -3.334324 |
| N | 3.997231  | 0.127988  | -2.028085 | H | -2.812444 | 5.194699  | 1.931334  |
| C | 6.070534  | 0.633668  | -0.663371 | H | -1.710590 | 6.211623  | 0.985521  |
| C | 7.390560  | -0.819872 | -2.751408 | H | -3.851174 | 7.418987  | 1.284460  |
| C | 8.109488  | -0.262496 | -1.698430 | H | -3.653451 | 6.986239  | -0.413816 |
| C | 7.454427  | 0.436408  | -0.662952 | H | -5.535513 | 5.751860  | 1.654135  |
| H | -3.337989 | 0.392336  | 1.233227  | H | -5.938793 | 6.418718  | 0.081566  |
| H | -0.604730 | -2.920443 | 0.908486  | H | -7.994425 | 4.369750  | 0.214008  |
| H | 0.154660  | -1.965851 | -1.235989 | H | -9.247392 | 2.283849  | -0.312680 |
| H | -2.363481 | 1.694553  | -2.545417 | H | -8.054227 | 0.240325  | -1.036917 |
| H | -1.695408 | 2.825574  | -4.585815 | H | -5.226135 | -3.500005 | 0.969266  |
| H | 2.578638  | -2.974465 | -3.948600 | C | -4.583465 | -3.511880 | 0.094389  |
| H | 1.569273  | -2.243110 | -5.207914 | C | -4.625567 | -2.384938 | -0.798793 |
| H | 3.694181  | -3.020965 | -6.224570 | C | -2.870627 | -4.590339 | -1.275451 |
| H | 3.613399  | -1.260314 | -6.275138 | C | -3.799742 | -2.404601 | -1.963050 |
| H | 5.349544  | -3.034377 | -4.496684 | C | -3.745182 | -4.563403 | -0.132631 |
| H | 5.850473  | -1.713201 | -5.536802 | C | -2.922048 | -3.503398 | -2.201020 |
| H | 7.894062  | -1.383147 | -3.532118 | C | -3.823919 | -1.297173 | -2.863692 |
| H | 9.187980  | -0.383318 | -1.654858 | H | -3.721182 | -5.404799 | 0.554874  |
| H | 8.033490  | 0.829003  | 0.168173  | C | -2.992323 | -1.347322 | -4.036642 |
| H | 5.077383  | -0.439673 | 4.197466  | H | -3.020465 | -0.508615 | -4.725881 |
| C | 4.489289  | 0.462081  | 4.050819  | C | -2.146380 | -2.392381 | -4.261337 |
| C | 4.584231  | 1.143684  | 2.787278  | H | -1.501455 | -2.397056 | -5.135991 |
| C | 3.832832  | 2.343414  | 2.599263  | C | -2.064459 | -3.498285 | -3.344136 |
| C | 3.669779  | 0.917638  | 5.040789  | C | -5.406649 | -1.248554 | -0.533108 |
| C | 2.983486  | 2.826419  | 3.637724  | C | -4.605321 | -0.175109 | -2.546203 |
| C | 3.906317  | 3.035561  | 1.352500  | H | -6.001386 | -1.214010 | 0.375562  |
| H | 3.595153  | 0.378520  | 5.981456  | H | -4.594911 | 0.683679  | -3.211618 |
| C | 3.152658  | 4.250087  | 1.194017  | H | -0.093512 | 5.548846  | -3.348881 |

|   |           |           |           |   |           |           |           |
|---|-----------|-----------|-----------|---|-----------|-----------|-----------|
| H | 3.218051  | 4.778844  | 0.247912  | O | 1.773243  | -1.511980 | 2.911701  |
| C | 2.338623  | 4.712151  | 2.185465  | C | 2.824372  | -2.411807 | 2.550684  |
| H | 1.755197  | 5.617080  | 2.037996  | H | 2.552294  | -2.979042 | 1.651510  |
| C | 5.345545  | 0.639620  | 1.720712  | H | 3.735043  | -1.838447 | 2.349531  |
| C | 4.665353  | 2.483285  | 0.308370  | C | 3.039417  | -3.358162 | 3.726971  |
| H | 5.894296  | -0.290570 | 1.847063  | H | 3.325107  | -2.779837 | 4.617518  |
| H | 0.429436  | 2.282413  | -5.768398 | H | 2.112131  | -3.894279 | 3.946304  |
| O | -2.514066 | -1.672023 | 2.477545  | O | 4.015506  | -4.352021 | 3.430961  |
| C | -1.979899 | -2.844139 | 3.106947  | C | 5.353869  | -3.869448 | 3.271241  |
| H | -2.120892 | -3.710734 | 2.450645  | H | 6.018112  | -4.557917 | 3.803412  |
| H | -0.904538 | -2.716179 | 3.291409  | H | 5.471198  | -2.874897 | 3.721158  |
| C | -2.699360 | -3.024840 | 4.434339  | C | 5.740644  | -3.814326 | 1.793881  |
| H | -2.235233 | -3.867990 | 4.968989  | H | 5.757364  | -4.831198 | 1.371248  |
| H | -2.576866 | -2.121612 | 5.038515  | H | 5.003796  | -3.231996 | 1.221871  |
| O | -4.103366 | -3.217235 | 4.307265  | O | 7.019890  | -3.206977 | 1.705591  |
| C | -4.487384 | -4.486392 | 3.790419  | C | 7.445070  | -3.026104 | 0.356842  |
| H | -4.165377 | -5.293690 | 4.465249  | H | 7.530486  | -3.991037 | -0.164263 |
| H | -4.044213 | -4.670182 | 2.803828  | H | 6.751203  | -2.378218 | -0.195068 |
| H | 3.258879  | 0.472231  | -1.404182 | H | 8.422724  | -2.543089 | 0.387760  |
| C | -6.001232 | -4.474865 | 3.649429  | H | -3.308131 | 1.840354  | -0.744815 |
| H | -6.481765 | -4.415771 | 4.637980  | C | 5.364729  | 1.281319  | 0.474860  |
| H | -6.307753 | -3.588249 | 3.072134  | H | 4.696652  | 2.991132  | -0.651630 |
| O | -6.372772 | -5.668618 | 2.975802  | C | 2.877750  | 2.106840  | 4.867793  |
| C | -7.773289 | -5.757638 | 2.741061  | C | 2.210043  | 4.010667  | 3.434902  |
| H | -8.337396 | -5.748750 | 3.685159  | C | 1.998751  | 2.576006  | 5.859816  |
| H | -8.122866 | -4.926958 | 2.110548  | H | 1.912667  | 2.028397  | 6.794577  |
| H | -7.953302 | -6.702214 | 2.223580  | C | 1.342602  | 4.441626  | 4.453875  |
| C | 0.987633  | 1.676312  | 0.423662  | H | 0.747275  | 5.337570  | 4.299516  |
| C | 2.186641  | -0.260292 | 0.850043  | H | 0.560526  | 4.074347  | 6.425130  |
| C | 0.618784  | 0.499287  | 2.500462  | C | 1.238431  | 3.728658  | 5.650255  |
| C | 0.330133  | 1.564103  | 1.662478  | C | -5.375204 | -0.129545 | -1.375727 |
| N | 1.916621  | 0.771893  | 0.051748  | C | -1.165275 | -4.562975 | -3.527718 |
| C | 1.553508  | -0.449391 | 2.087779  | H | -0.503678 | -4.555232 | -4.389872 |
| C | 0.690898  | 2.762573  | -0.529848 | C | -1.959444 | -5.637308 | -1.501819 |
| C | 0.117223  | 4.808192  | -2.585317 | H | -1.915057 | -6.463546 | -0.797174 |
| C | -0.537245 | 3.552499  | -0.468985 | H | -0.411073 | -6.430933 | -2.769057 |
| C | 1.531036  | 3.060430  | -1.571893 | C | -1.113970 | -5.617723 | -2.613308 |

**Table S12.** Cartesian coordinates of computed DFT model of *meso*-[C\*-P2]<sub>2</sub>,  
 $E(\text{B3LYP}) = -4286.64771682$  Hartree.

|   |           |           |           |   |           |           |           |
|---|-----------|-----------|-----------|---|-----------|-----------|-----------|
| C | -5.311917 | -0.643214 | -2.636202 | C | -1.602344 | 2.977618  | -2.287817 |
| C | -8.156043 | -0.993289 | -2.607975 | C | -5.813782 | 1.014087  | 1.403052  |
| C | 4.820937  | -1.596081 | -2.200275 | N | -5.005310 | -1.217797 | 1.983024  |
| C | -9.241220 | 1.115996  | -0.980499 | N | -3.949481 | 0.770573  | 2.923713  |
| N | 2.847904  | -3.094046 | -0.439445 | C | -4.629118 | 3.076759  | 2.220391  |
| C | 2.756635  | -2.086994 | -0.248692 | C | -3.677791 | 3.675203  | 1.374067  |
| C | -2.759287 | 0.292220  | -0.303255 | C | 0.162112  | 1.972429  | -1.215424 |
| C | -0.076210 | -3.106401 | 0.592933  | C | -2.097576 | 4.089633  | -0.155189 |
| C | 1.602343  | -2.977620 | 2.287812  | C | -5.925786 | -0.382009 | 1.280537  |
| C | 5.813783  | -1.014088 | -1.403052 | C | -2.408084 | 5.317300  | 0.380191  |
| C | 5.005313  | 1.217797  | -1.983021 | C | -3.436181 | 5.082534  | 1.360857  |
| C | 3.949483  | -0.770571 | -2.923714 | C | 2.151612  | 0.881379  | 0.005870  |
| N | 4.629119  | -3.076758 | -2.220394 | N | -4.020818 | -0.628411 | 2.831251  |
| N | 3.677791  | -3.675202 | -1.374071 | C | 4.263302  | 0.839675  | 1.800531  |
| C | -0.162113 | -1.972430 | 1.215420  | C | 1.061270  | 0.844344  | -0.988363 |
| C | 2.097575  | -4.089633 | 0.155184  | C | 2.584072  | 2.070269  | 0.611748  |
| C | 5.925788  | 0.382008  | -1.280535 | C | 2.092635  | 3.002123  | 0.371035  |
| C | 2.408083  | -5.317300 | -0.380197 | H | -1.054247 | 3.819308  | -1.213803 |
| C | 3.436180  | -5.082533 | -1.360863 | H | -6.902299 | -0.996220 | 0.421611  |
| C | -2.151613 | -0.881380 | -0.005873 | H | -7.579127 | -0.360847 | -0.140135 |
| C | 4.020821  | 0.628413  | -2.831250 | H | -1.717380 | 6.587279  | -0.025626 |
| C | -4.263305 | -0.839675 | -1.800532 | H | -5.039956 | -2.632578 | 1.802113  |
| N | -1.061271 | -0.844345 | 0.988359  | H | 3.764741  | -0.310906 | 1.166157  |
| C | -2.584075 | -2.070270 | -0.611750 | H | 4.223738  | -1.272885 | 1.380560  |
| C | -2.092639 | -3.002124 | -0.371036 | H | -5.348743 | 3.932084  | 3.057448  |
| C | 1.054246  | -3.819309 | 1.213798  | H | -6.092188 | 3.506062  | 3.725596  |
| C | 6.902301  | 0.996218  | -0.421608 | H | -0.886944 | 1.896509  | -2.276733 |
| H | 7.579127  | 0.360843  | 0.140139  | H | -4.177470 | 5.910367  | 2.224187  |
| H | 1.717379  | -6.587279 | 0.025618  | H | -4.014153 | 6.984542  | 2.234524  |
| H | 5.039959  | 2.632578  | -1.802109 | H | 3.646929  | 2.057743  | 1.514344  |
| H | -3.764742 | 0.310906  | -1.166159 | H | 3.978812  | 2.985197  | 1.964938  |
| H | -4.223738 | 1.272885  | -1.380563 | H | -1.021923 | 0.714735  | -3.088559 |
| H | 5.348744  | -3.932083 | -3.057452 | C | -1.780449 | 0.662561  | -3.861438 |
| H | 6.092189  | -3.506061 | -3.725599 | C | 0.819195  | -0.259613 | -1.763305 |
| H | 0.886943  | -1.896511 | 2.276728  | C | 1.431800  | -1.139711 | -1.625461 |
| H | 4.177470  | -5.910367 | -2.224193 | C | -6.010292 | -3.216225 | 0.930944  |
| H | 4.014152  | -6.984541 | -2.234532 | C | -5.126899 | 5.328062  | 3.060749  |
| H | -3.646933 | -2.057744 | -1.514344 | C | -5.709769 | 5.952463  | 3.731918  |
| H | -3.978818 | -2.985198 | -1.964937 | C | -6.944619 | -2.349927 | 0.262692  |
| H | 1.021922  | -0.714737 | 3.088555  | H | -7.674804 | -2.789363 | -0.410893 |
| H | 1.780448  | -0.662564 | 3.861434  | C | -3.091902 | -1.490168 | 3.512741  |
| H | -0.819196 | 0.259612  | 1.763301  | H | -2.340248 | -1.037180 | 4.152723  |
| C | -1.431800 | 1.139710  | 1.625457  | C | 10.022200 | -0.126337 | 1.641082  |
| C | 6.010296  | 3.216224  | -0.930939 | H | 11.026282 | -0.519068 | 1.866742  |
| C | 5.126899  | -5.328060 | -3.060754 | C | 10.136510 | 0.761253  | 0.999041  |
| C | 5.709769  | -5.952462 | -3.731924 | C | -0.195059 | -0.325159 | -2.794829 |
| C | 6.944621  | 2.349924  | -0.262687 | C | -0.277504 | -1.255335 | -3.348921 |
| C | 7.674806  | 2.789359  | 0.410899  | H | 7.324782  | 1.296293  | 3.717793  |
| H | 3.091905  | 1.490172  | -3.512739 | H | 5.993050  | 1.780908  | 3.185975  |
| C | 2.340251  | 1.037184  | -4.152722 | H | 6.160805  | 2.530473  | 2.405852  |

|   |            |           |           |   |           |           |           |
|---|------------|-----------|-----------|---|-----------|-----------|-----------|
| H | -10.022200 | 0.126340  | -1.641071 | O | 5.391827  | 2.220183  | 3.991949  |
| C | -11.026283 | 0.519072  | -1.866728 | C | -4.078165 | -3.461138 | 2.458493  |
| H | -10.136510 | -0.761250 | -0.999029 | H | -0.580329 | 5.177402  | -1.806584 |
| C | 0.195059   | 0.325158  | 2.794826  | H | 9.334153  | 0.267139  | 2.931322  |
| C | 0.277504   | 1.255333  | 3.348917  | C | 10.018109 | 0.883968  | 3.535973  |
| H | -7.324789  | -1.296293 | -3.717788 | H | 9.083041  | -0.636438 | 3.507387  |
| H | -5.993055  | -1.780908 | -3.185973 | H | -3.112664 | -2.840642 | 3.327243  |
| O | -6.160809  | -2.530473 | -2.405850 | O | -2.383114 | -3.473248 | 3.825965  |
| C | -5.391835  | -2.220184 | -3.991948 | C | 9.759473  | -1.470566 | -0.295593 |
| H | 4.078169   | 3.461139  | -2.458488 | H | 9.767961  | -0.605552 | -0.975205 |
| H | 0.580328   | -5.177403 | 1.806577  | H | 10.780809 | -1.871125 | -0.216281 |
| C | -9.334158  | -0.267137 | -2.931312 | C | 9.102645  | -2.240173 | -0.706615 |
| H | -10.018116 | -0.883965 | -3.535962 | H | 7.170224  | 0.405943  | 4.345522  |
| H | -9.083045  | 0.636439  | -3.507379 | H | 7.775513  | 2.084030  | 4.341961  |
| O | 3.112668   | 2.840645  | -3.327239 | O | -0.387058 | 6.251946  | -0.728528 |
| C | 2.383118   | 3.473252  | -3.825960 | C | -2.354526 | 7.175956  | -0.702720 |
| H | -9.759465  | 1.470570  | 0.295603  | H | 0.340233  | 5.895713  | 0.010706  |
| H | -9.767953  | 0.605556  | 0.975215  | H | -1.343932 | 5.501931  | -2.521217 |
| H | -10.780801 | 1.871130  | 0.216294  | H | 0.344870  | 4.995930  | -2.362283 |
| C | -9.102635  | 2.240176  | 0.706623  | H | -1.533781 | 7.220516  | 0.851006  |
| H | -7.170231  | -0.405943 | -4.345518 | C | 0.032219  | 7.152079  | -1.191856 |
| H | -7.775521  | -2.084029 | -4.341956 | H | 6.487410  | -1.650428 | -0.835790 |
| O | 0.387057   | -6.251947 | 0.728521  | C | 3.182153  | -1.222353 | -3.546225 |
| C | 2.354524   | -7.175957 | 0.702712  | C | 4.096137  | 4.846852  | -2.222434 |
| H | -0.340234  | -5.895712 | -0.010713 | C | 3.358913  | 5.478018  | -2.711575 |
| H | 1.343930   | -5.501933 | 2.521210  | H | 5.045133  | 5.410631  | -1.366120 |
| H | -0.344871  | -4.995932 | 2.362277  | C | 5.043310  | 6.482918  | -1.192911 |
| C | 1.533780   | -7.220515 | -0.851014 | H | 6.728606  | 5.055381  | -0.064102 |
| C | -0.032221  | -7.152080 | 1.191848  | H | 5.994998  | 4.608358  | -0.729979 |
| C | 5.311913   | 0.643214  | 2.636203  | C | -3.182151 | 1.222356  | 3.546223  |
| C | 8.156039   | 0.993289  | 2.607981  | C | -6.487409 | 1.650426  | 0.835789  |
| N | -4.820936  | 1.596082  | 2.200274  | C | -5.994994 | -4.608360 | 0.729986  |
| C | 9.241223   | -1.115994 | 0.980508  | H | -6.728602 | -5.055384 | 0.064110  |
| C | -2.847904  | 3.094046  | 0.439441  | C | -3.358908 | -5.478016 | 2.711582  |
| C | -2.756635  | 2.086994  | 0.248688  | H | -4.096132 | -4.846851 | 2.222440  |
| C | 2.759287   | -0.292221 | 0.303252  | H | -5.045128 | -5.410632 | 1.366127  |
| C | 0.076209   | 3.106400  | -0.592938 | C | -5.043304 | -6.482918 | 1.192920  |



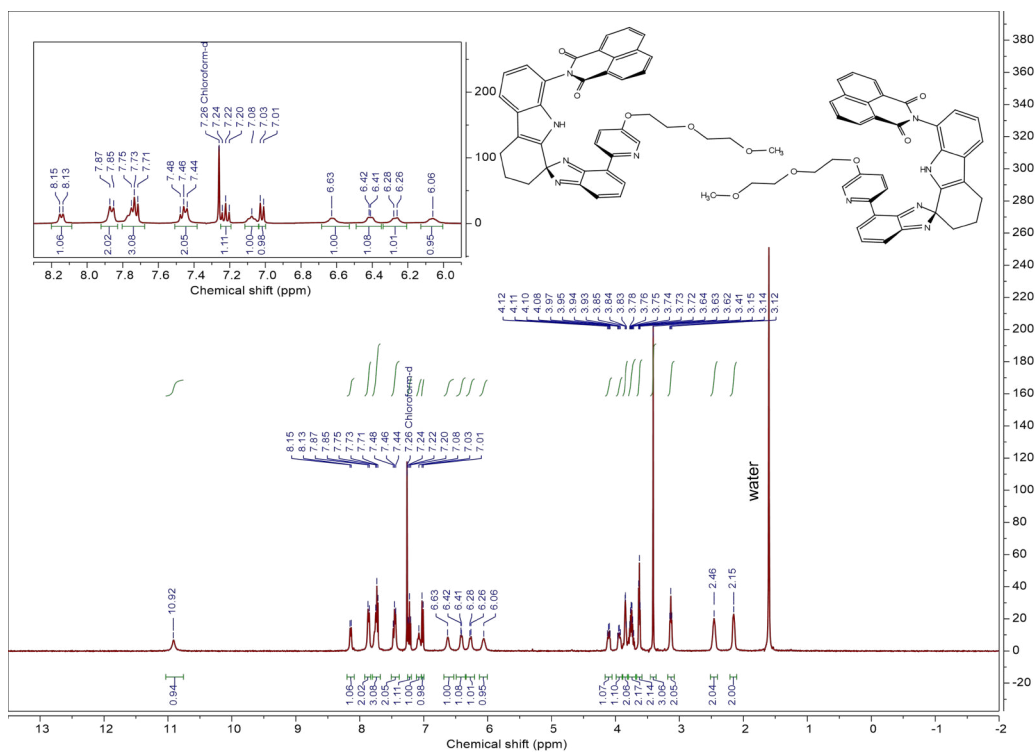

Fig. S23  $^1\text{H}$  NMR (400 MHz) spectrum of *rac*-C\*-NI in  $\text{CDCl}_3$  ( $T = 298\text{ K}$ ).

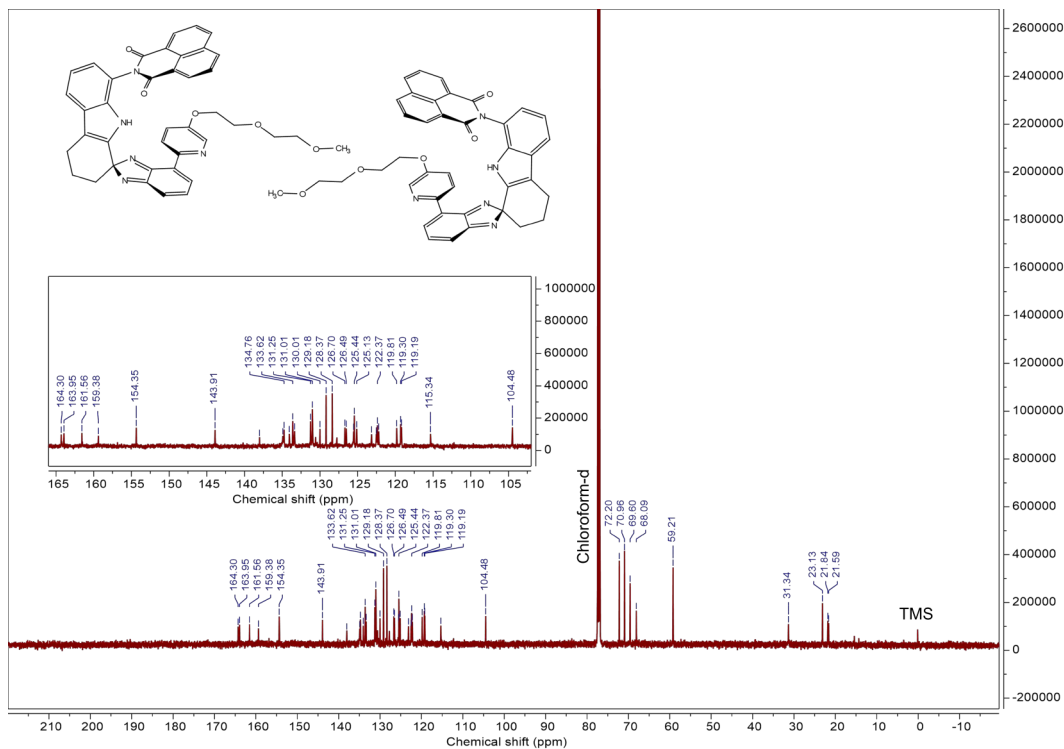

Fig. S24  $^{13}\text{C}$  NMR (125 MHz) spectrum of *rac*-C\*-NI in  $\text{CDCl}_3$  ( $T = 298\text{ K}$ ).

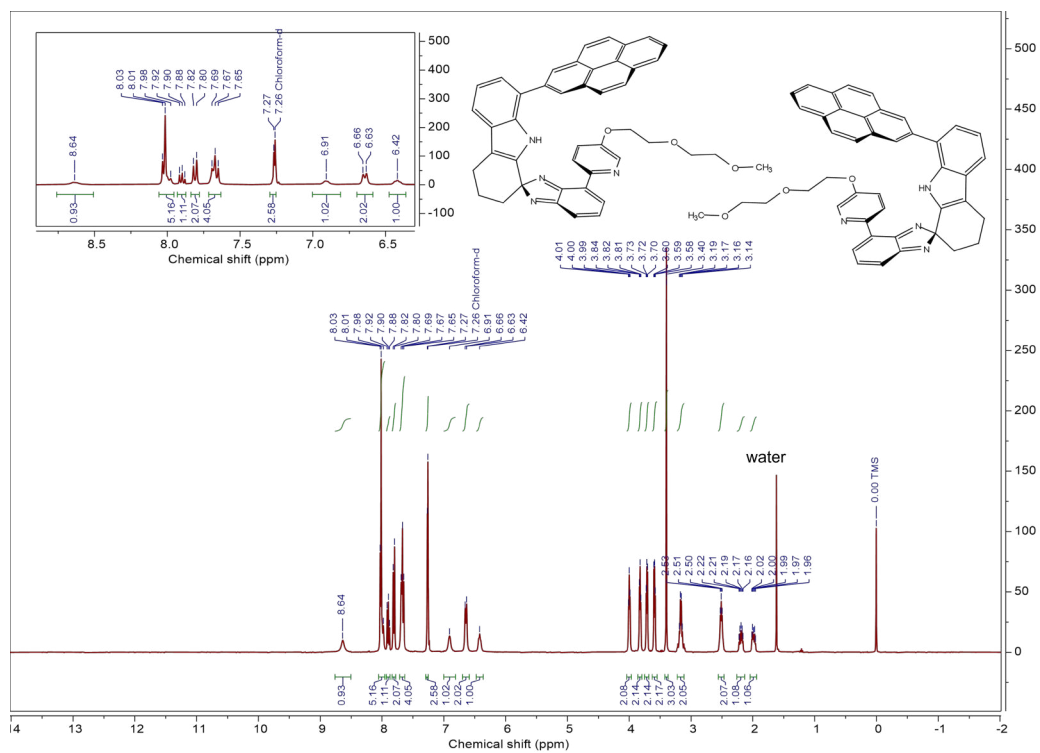

Fig. S25 <sup>1</sup>H NMR (500 MHz) spectrum of *rac*-C\*-P2 in CDCl<sub>3</sub> (*T* = 298 K).

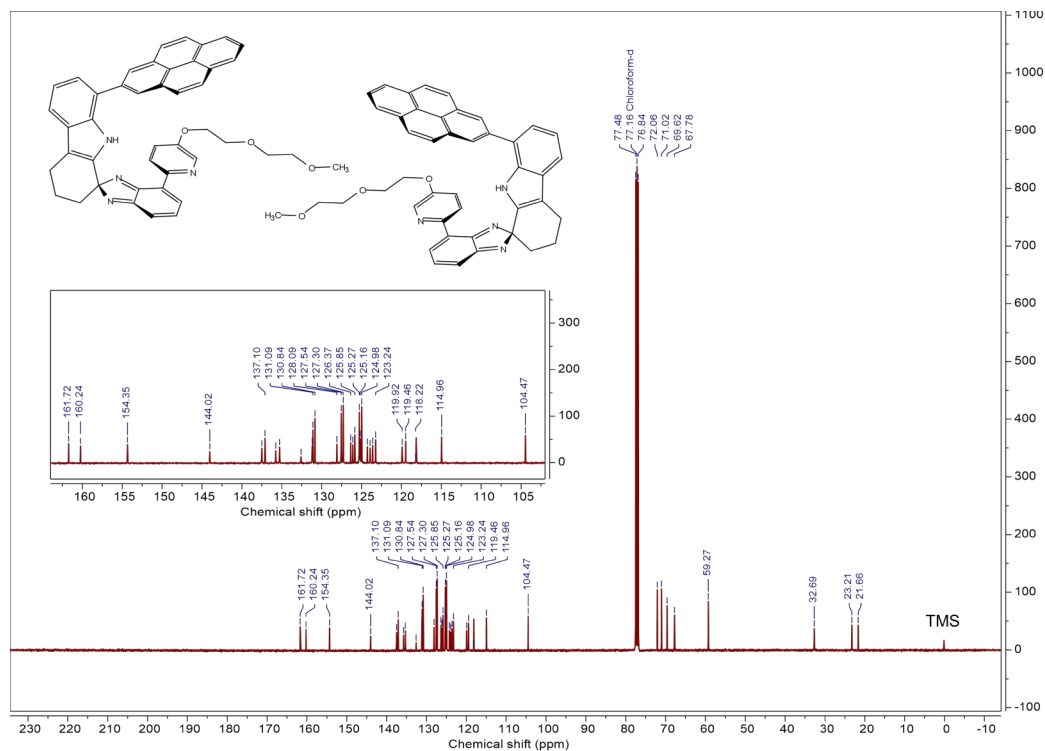

Fig. S26 <sup>13</sup>C NMR (100 MHz) spectrum of *rac*-C\*-P2 in CDCl<sub>3</sub> (*T* = 298 K).

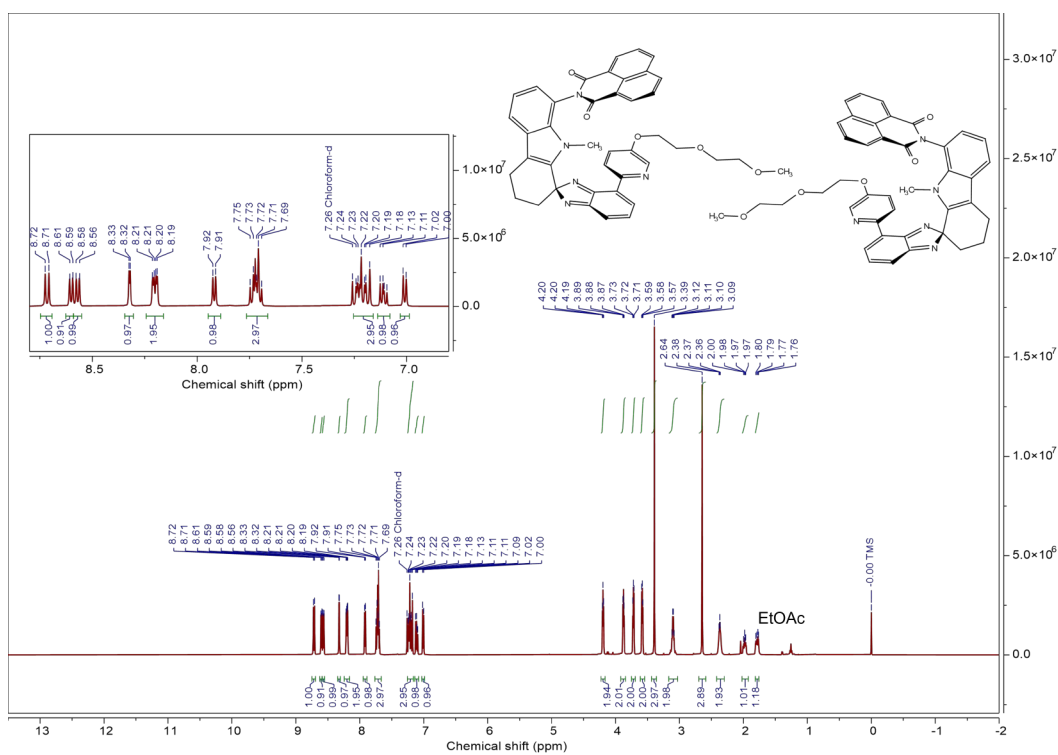

Fig. S27  $^1\text{H}$  NMR (500 MHz) spectrum of *rac*-C\*-NIME in  $\text{CDCl}_3$  ( $T = 298$  K).

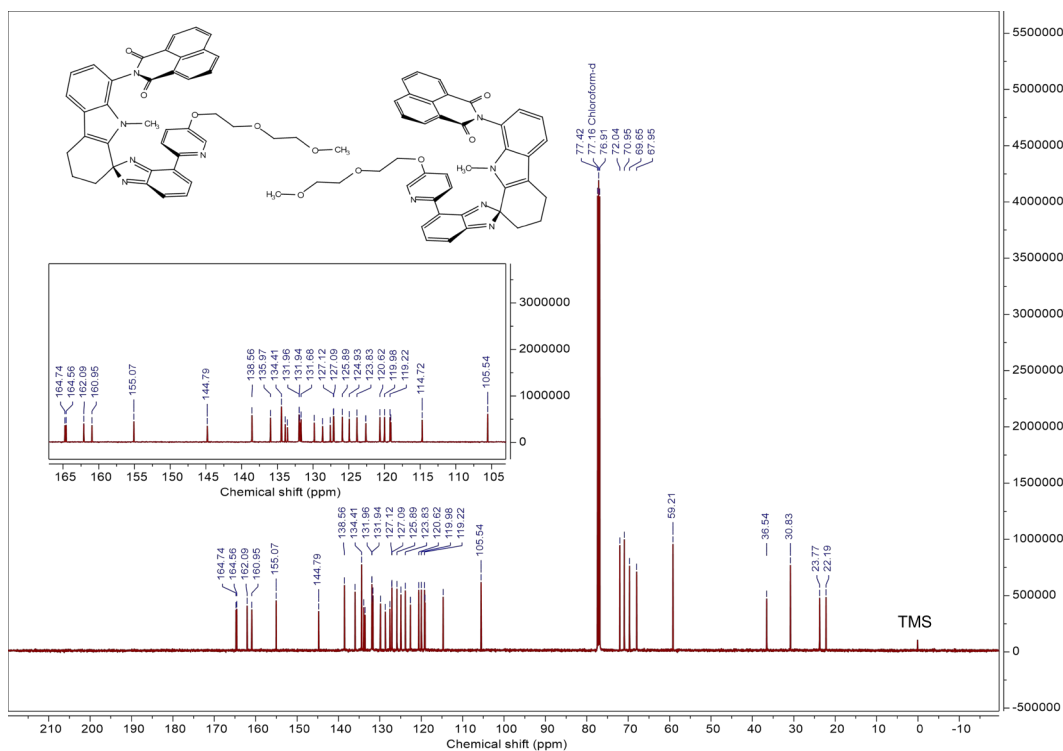

Fig. S28  $^{13}\text{C}$  NMR (125 MHz) spectrum of *rac*-C\*-NIME in  $\text{CDCl}_3$  ( $T = 298$  K).

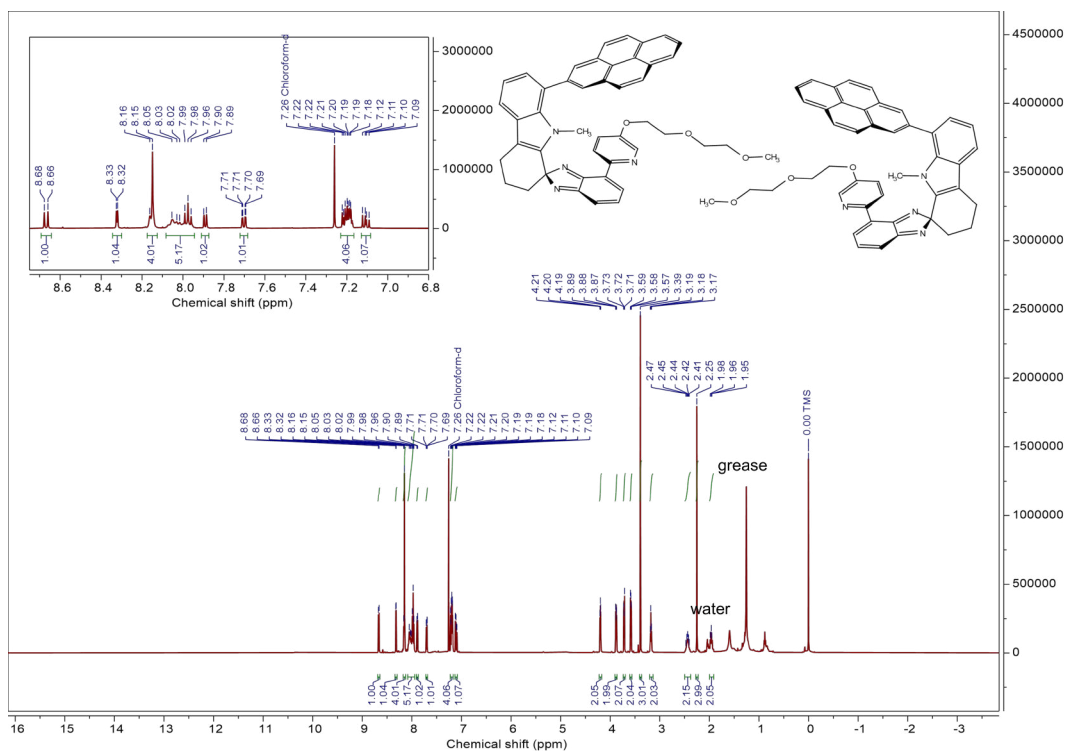

Fig. S29  $^1\text{H}$  NMR (500 MHz) spectrum of *rac*-C\*-P2Me in  $\text{CDCl}_3$  ( $T = 298\text{ K}$ ).

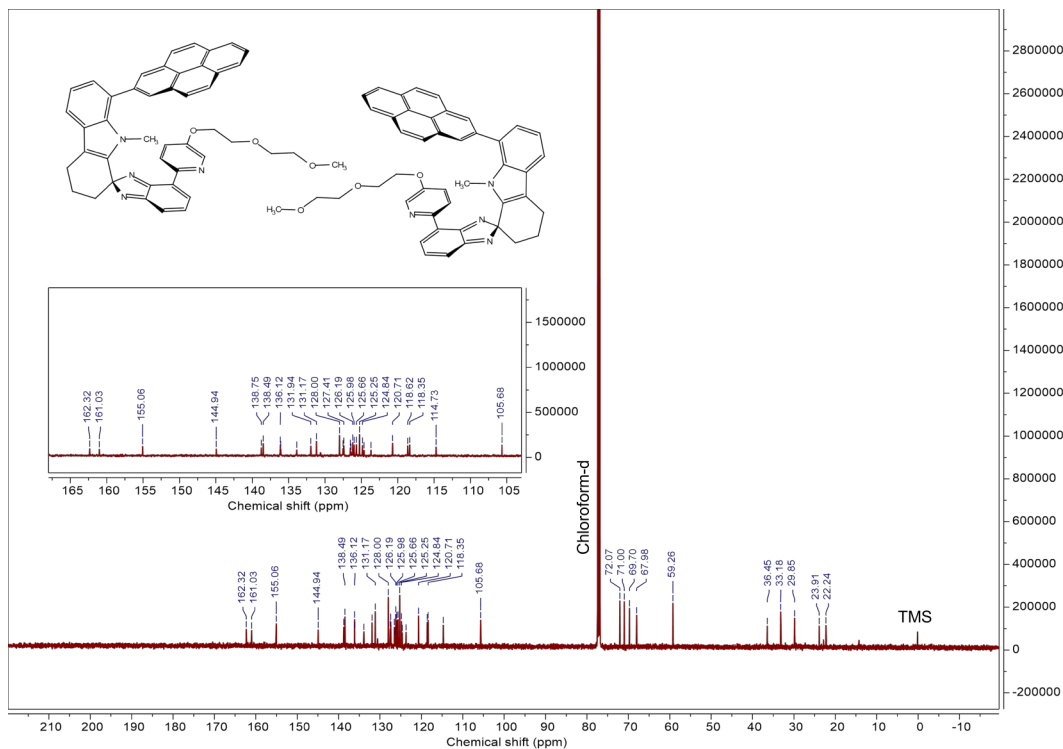

Fig. S30  $^{13}\text{C}$  NMR (125 MHz) spectrum of *rac*-C\*-P2Me in  $\text{CDCl}_3$  ( $T = 298\text{ K}$ ).

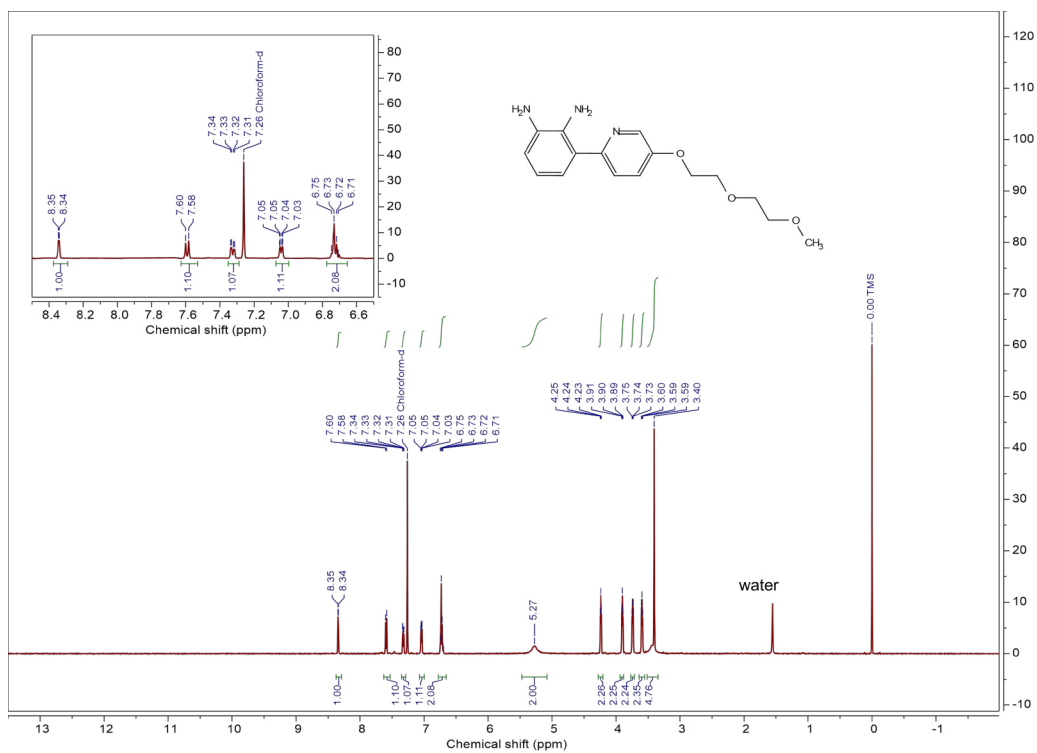

**Fig. S31** <sup>1</sup>H NMR (500 MHz) spectrum of **3** in CDCl<sub>3</sub> (*T* = 298 K).

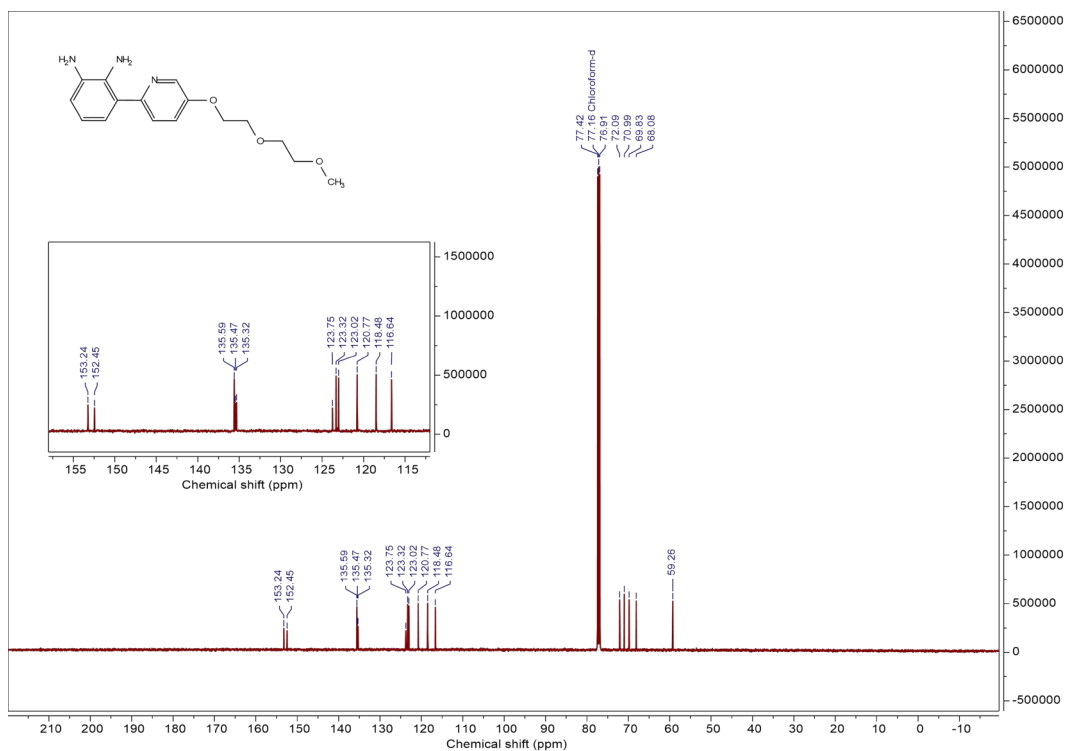

**Fig. S32** <sup>13</sup>C NMR (125 MHz) spectrum of **3** in CDCl<sub>3</sub> (*T* = 298 K).

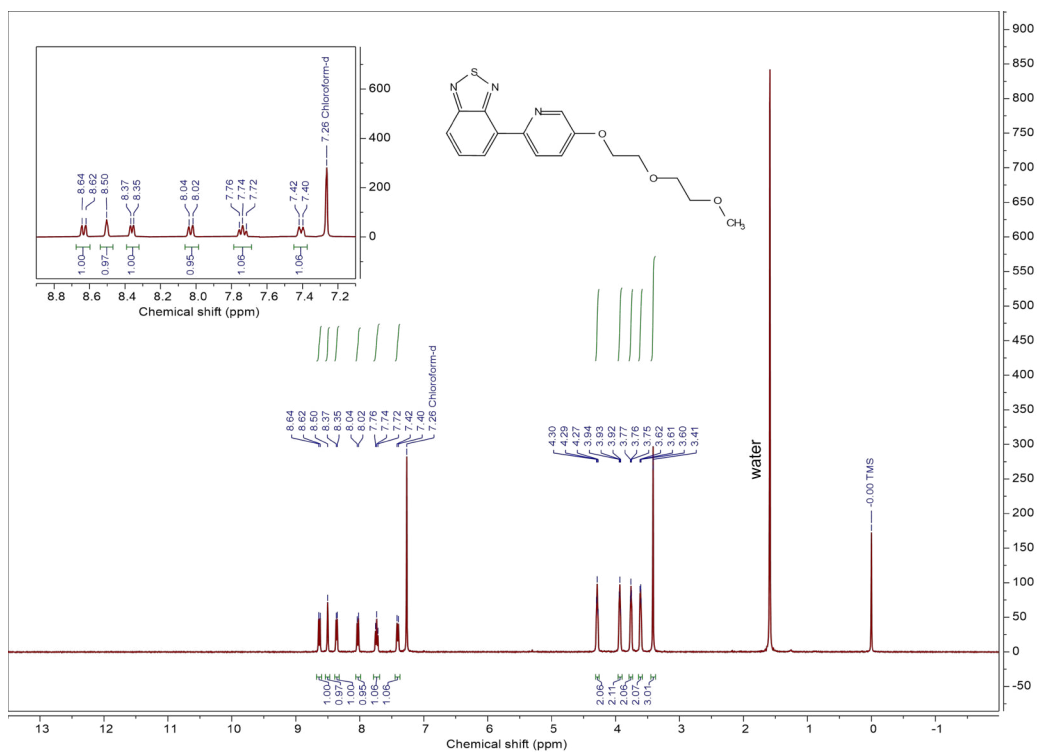

Fig. S33 <sup>1</sup>H NMR (400 MHz) spectrum of **7** in CDCl<sub>3</sub> (*T* = 298 K).

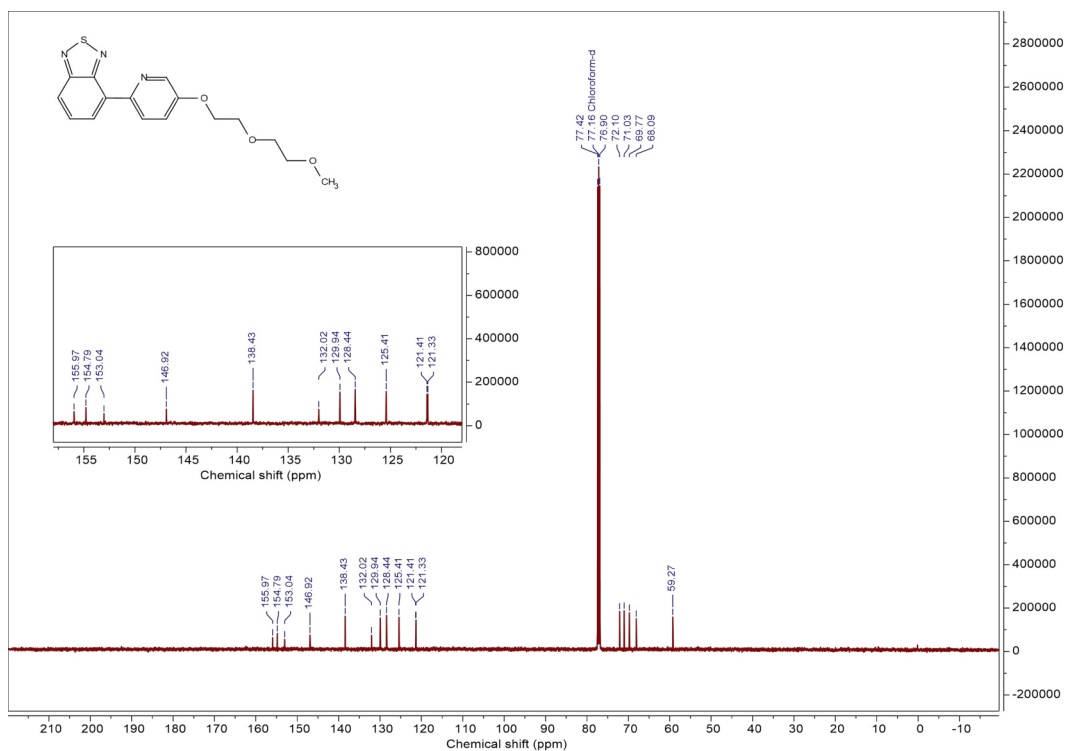

Fig. S34 <sup>13</sup>C NMR (125 MHz) spectrum of **7** in CDCl<sub>3</sub> (*T* = 298 K).

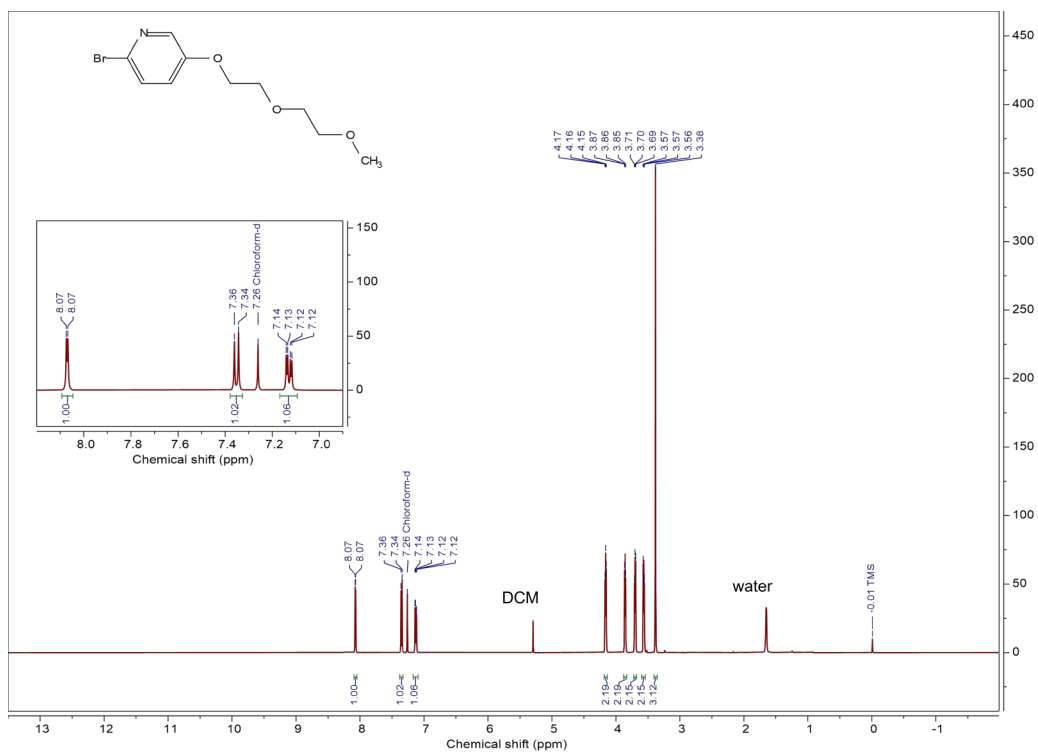

**Fig. S35** <sup>1</sup>H NMR (500 MHz) spectrum of **6** in CDCl<sub>3</sub> (*T* = 298 K).

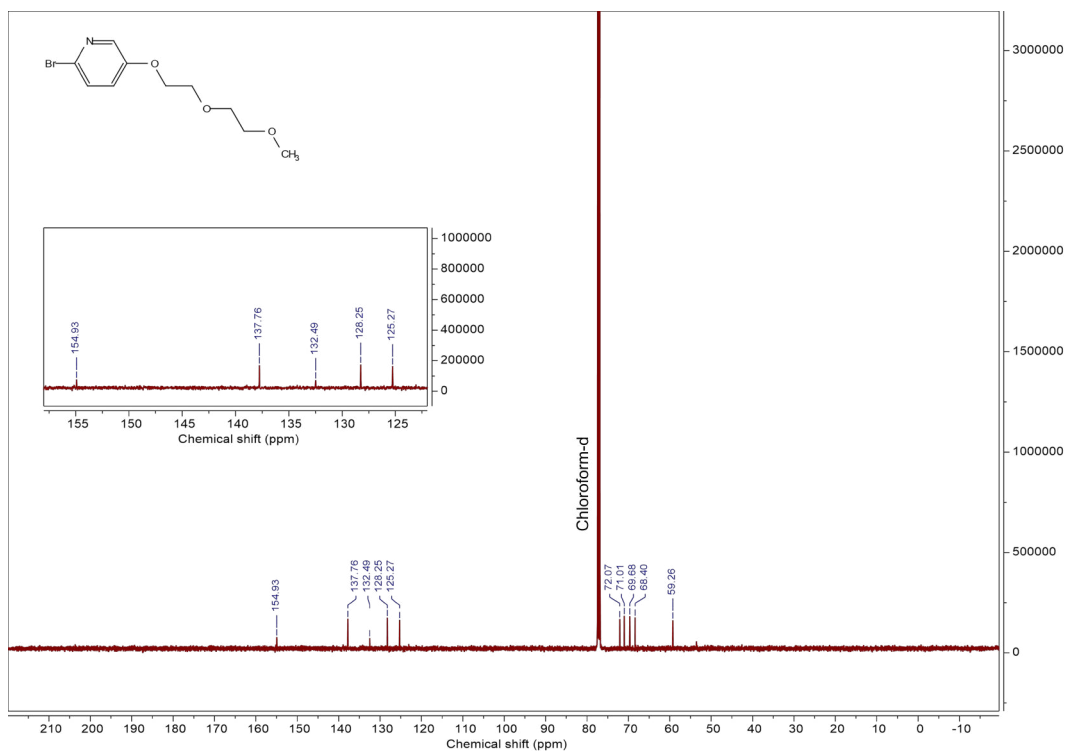

**Fig. S36** <sup>13</sup>C NMR (125 MHz) spectrum of **6** in CDCl<sub>3</sub> (*T* = 298 K).

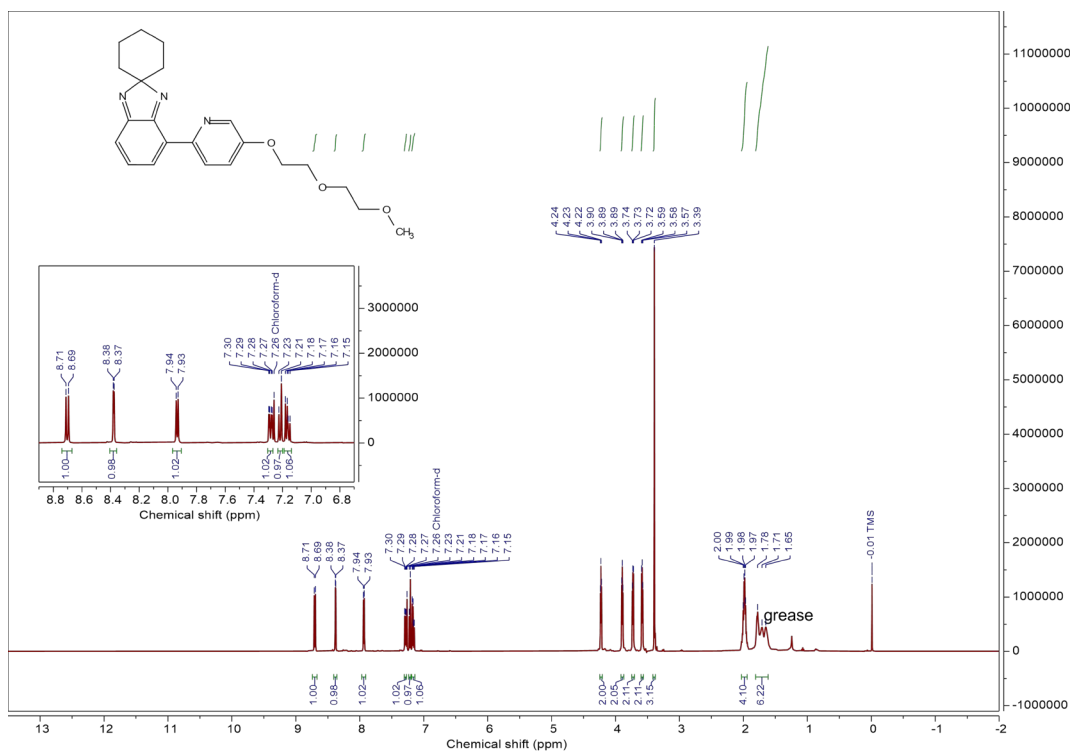

**Fig. S37** <sup>1</sup>H NMR (400 MHz) spectrum of **5** in CDCl<sub>3</sub> (*T* = 298 K).

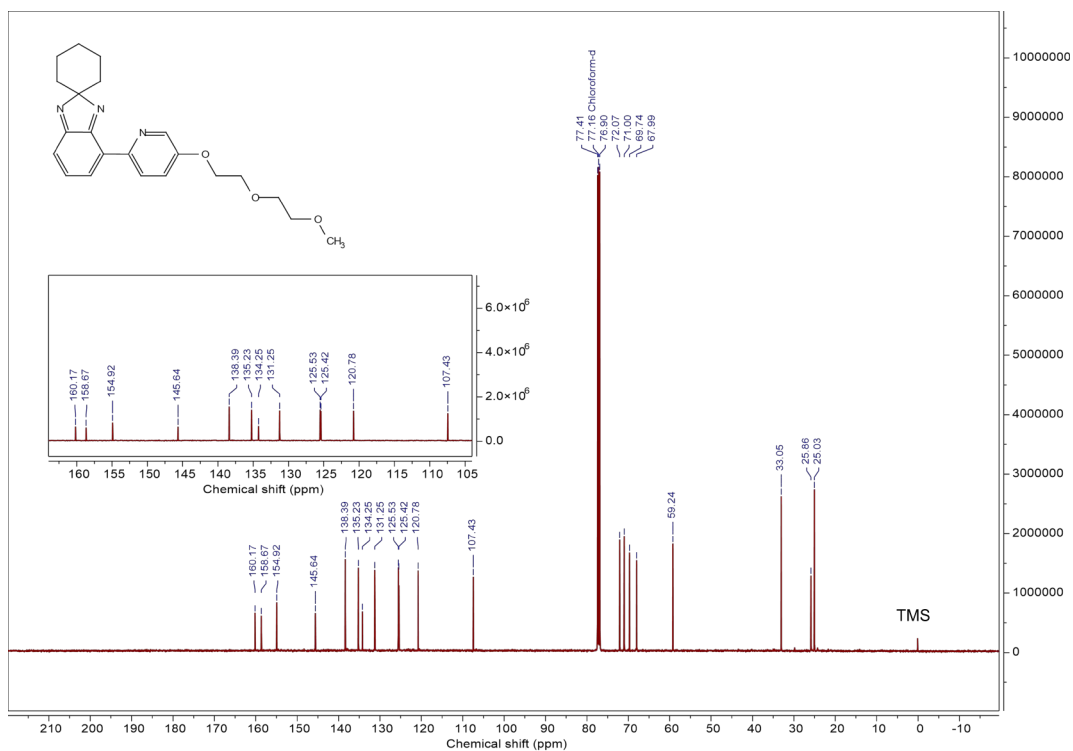

**Fig. S38** <sup>13</sup>C NMR (125 MHz) spectrum of **5** in CDCl<sub>3</sub> (*T* = 298 K).
